# Supplementary material for: Tim29 is a novel subunit of the human TIM22 translocase and is involved in complex assembly and stability
Source: eLife. 2016 Aug 24;5:e17463. doi: 10.7554/eLife.17463 (PMC5016092; doi:10.7554/eLife.17463)
Supplement: Figure 3—source data 1. — Data from C19orf523XFLAG immunoprecipitations looking at the presence of TIM22 complex subunits. The fold increase (C19orf52/EV) is shown in the last column. DOI: http://dx.doi.org/10.7554/eLife.17463.009 [file elife-17463-fig3-data1.xls]

## Sheet: C19orf52 IP
Gene symbol	Entrez Gene Id	Gene desc.	Alternate names	No. of Uniq. peptides in Empty vector (EV)	Sequence Coverage in Empty vector (EV)	No. of Uniq. peptides in C19orf52 IP	Sequence Coverage in C19orf52 IP	Fold (C19ORF/EV)
C19orf52	90580	chromosome 19 open reading frame 52	-	0	0	51	63.462	338.61
TIMM10	26519	translocase of inner mitochondrial membrane 10 homolog (yeast)	TIM10|TIM10A	0	0	8	61.111	33.46
TIMM22	29928	translocase of inner mitochondrial membrane 22 homolog (yeast)	TEX4|TIM22	0	0	6	39.175	17.05
TIMM10B	26515	translocase of inner mitochondrial membrane 10 homolog B (yeast)	FXC1|TIM10B|Tim9b	0	0	6	70.874	12.82
TIMM9	26520	translocase of inner mitochondrial membrane 9 homolog (yeast)	TIM9|TIM9A	0	0	3	41.573	8.59
