# Supplementary material for: Tim29 is a novel subunit of the human TIM22 translocase and is involved in complex assembly and stability
Source: eLife journal article supplement (doi:10.7554/elife.17463), 2016-08-24
Supplement: supp [file elife_poa_e17463_Figure_1_source_data_1.xls]

## Sheet: Tim10b IP
Gene symbol	Entrez Gene Id	Gene desc.	Alternate names	No. of peptides (in empty vector (EV))	No. of peptides (in Tim10b IP)	Avg fold (IP/EV)	Avg fold (IP/EV) (Log2)	P-value (eBayes Fit)	P-value (-log10)
TIMM10	26519	translocase of inner mitochondrial membrane 10 homolog (yeast)	TIM10|TIM10A	0	51	14.5692	3.86485	1.02701e-05	4.98843
TIMM22	29928	translocase of inner mitochondrial membrane 22 homolog (yeast)	TEX4|TIM22	0	16	5.228	2.38626	1.82233e-05	4.73937
TIMM10B	26515	translocase of inner mitochondrial membrane 10 homolog B (yeast)	FXC1|TIM10B|Tim9b	0	71	19.8315	4.30972	2.84566e-05	4.54582
STOML2	30968	stomatin (EPB72)-like 2	HSPC108|SLP-2	5	59	7.05681	2.81902	0.000128846	3.88993
IMMT	10989	inner membrane protein, mitochondrial	HMP|MINOS2|P87|P87/89|P89|PIG4|PIG52	4	20	3.48244	1.8001	0.00105702	2.97592
YWHAE	7531	tyrosine 3-monooxygenase/tryptophan 5-monooxygenase activation protein, epsilon	14-3-3E|HEL2|KCIP-1|MDCR|MDS	8	22	2.43112	1.28162	0.00139011	2.85695
NME4	4833	NME/NM23 nucleoside diphosphate kinase 4	NDPK-D|NM23H4|nm23-H4	11	1	0.320981	-1.63944	0.00295642	2.52923
TIMM9	26520	translocase of inner mitochondrial membrane 9 homolog (yeast)	TIM9|TIM9A	0	14	4.60719	2.20389	0.00370179	2.43159
YWHAB	7529	tyrosine 3-monooxygenase/tryptophan 5-monooxygenase activation protein, beta	GW128|HEL-S-1|HS1|KCIP-1|YWHAA	4	19	2.921	1.54646	0.00469435	2.32842
MRPS18B	28973	mitochondrial ribosomal protein S18B	C6orf14|HSPC183|HumanS18a|MRP-S18-2|MRPS18-2|PTD017|S18amt	14	7	0.604118	-0.727097	0.00560538	2.2514
YWHAG	7532	tyrosine 3-monooxygenase/tryptophan 5-monooxygenase activation protein, gamma	14-3-3GAMMA|PPP1R170	5	19	2.60817	1.38304	0.00732259	2.13534
PABPC4	8761	poly(A) binding protein, cytoplasmic 4 (inducible form)	APP-1|APP1|PABP4|iPABP	11	6	0.659897	-0.599688	0.0109727	1.95969
SFN	2810	stratifin	YWHAS	4	18	2.80838	1.48974	0.0117727	1.92912
YWHAH	7533	tyrosine 3-monooxygenase/tryptophan 5-monooxygenase activation protein, eta	YWHA1	4	18	2.80838	1.48974	0.0117727	1.92912
S100A8	6279	S100 calcium binding protein A8	60B8AG|CAGA|CFAG|CGLA|CP-10|L1Ag|MA387|MIF|MRP8|NIF|P8	1	5	1.88134	0.911759	0.0130117	1.88567
EEF1A2	1917	eukaryotic translation elongation factor 1 alpha 2	EEF1AL|EF-1-alpha-2|EF1A|HS1|STN|STNL	31	22	0.744924	-0.424836	0.0146496	1.83417
MRPS26	64949	mitochondrial ribosomal protein S26	C20orf193|GI008|MRP-S13|MRP-S26|MRPS13|NY-BR-87|RPMS13|dJ534B8.3	20	11	0.588223	-0.765565	0.0153022	1.81525
HAX1	10456	HCLS1 associated protein X-1	HCLSBP1|HS1BP1|SCN3	0	5	2.33967	1.22631	0.0161693	1.79131
YWHAQ	10971	tyrosine 3-monooxygenase/tryptophan 5-monooxygenase activation protein, theta	14-3-3|1C5|HS1	5	18	2.49555	1.31936	0.0174197	1.75896
PIP	5304	prolactin-induced protein	GCDFP-15|GCDFP15|GPIP4	13	36	2.88851	1.53032	0.0178077	1.74939
YME1L1	10730	YME1-like 1 ATPase	FTSH|MEG4|PAMP|YME1L	2	29	5.49705	2.45866	0.0183728	1.73582
C19orf52	90580	chromosome 19 open reading frame 52	-	0	50	14.7891	3.88647	0.0203717	1.69097
RPS4X	6191	ribosomal protein S4, X-linked	CCG2|DXS306|RPS4|S4|SCAR|SCR10	4	1	0.591671	-0.757133	0.0218034	1.66148
GGCT	79017	gamma-glutamylcyclotransferase	C7orf24|CRF21|GCTG|GGC	1	5	1.79116	0.840898	0.0220698	1.6562
PABPC3	5042	poly(A) binding protein, cytoplasmic 3	PABP3|PABPL3|tPABP	11	5	0.575474	-0.797178	0.0224916	1.64798
HNRNPD	3184	heterogeneous nuclear ribonucleoprotein D (AU-rich element RNA binding protein 1, 37kDa)	AUF1|AUF1A|HNRPD|P37|hnRNPD0	22	11	0.541204	-0.885756	0.0242366	1.61553
AGK	55750	acylglycerol kinase	CATC5|CTRCT38|MTDPS10|MULK	0	55	16.1956	4.01753	0.0245127	1.61061
MRPS31	10240	mitochondrial ribosomal protein S31	IMOGN38|MRP-S31|S31mt	32	16	0.512746	-0.963684	0.0248084	1.6054
PCBP2	5094	poly(rC) binding protein 2	HNRNPE2|HNRPE2|hnRNP-E2	17	9	0.642396	-0.638466	0.0250702	1.60084
PABPC1	26986	poly(A) binding protein, cytoplasmic 1	PAB1|PABP|PABP1|PABPC2|PABPL1	23	11	0.556303	-0.846056	0.0267881	1.57206
MRPS27	23107	mitochondrial ribosomal protein S27	MRP-S27|S27mt	41	21	0.548759	-0.865754	0.0278435	1.55528
NIPSNAP1	8508	nipsnap homolog 1 (C. elegans)	-	9	3	0.527637	-0.922382	0.0347595	1.45893
PVALB	5816	parvalbumin	D22S749	8	16	1.85123	0.888484	0.0393904	1.40461
TPP2	7174	tripeptidyl peptidase II	TPP-2	13	4	0.413219	-1.27502	0.0411558	1.38557
MRPS23	51649	mitochondrial ribosomal protein S23	CGI-138|HSPC329|MRP-S23	19	11	0.649786	-0.621963	0.0493972	1.3063
MRPS21	54460	mitochondrial ribosomal protein S21	MDS016|MRP-S21|RPMS21	11	5	0.615363	-0.700491	0.0522402	1.282
RPLP2	6181	ribosomal protein, large, P2	D11S2243E|LP2|P2|RPP2	2	5	1.71965	0.782118	0.0529538	1.2761
RPLP0	6175	ribosomal protein, large, P0	L10E|LP0|P0|PRLP0|RPP0	2	8	2.21989	1.15049	0.0536455	1.27047
APOO	79135	apolipoprotein O	FAM121B|My025	0	4	2.00864	1.00622	0.0543365	1.26491
RANBP2	5903	RAN binding protein 2	ADANE|ANE1|IIAE3|NUP358|TRP1|TRP2	4	0	0.57862	-0.789311	0.0549581	1.25997
WDR91	29062	WD repeat domain 91	HSPC049	3	0	0.611618	-0.709298	0.0549847	1.25976
MRPS22	56945	mitochondrial ribosomal protein S22	C3orf5|COXPD5|GIBT|GK002|MRP-S22|RPMS22	37	26	0.690816	-0.533627	0.0575196	1.24018
PTBP2	58155	polypyrimidine tract binding protein 2	PTBLP|brPTB|nPTB	5	2	0.634946	-0.655294	0.0616597	1.21
MTPAP	55149	mitochondrial poly(A) polymerase	PAPD1|SPAX4	14	5	0.491644	-1.02431	0.0641789	1.19261
TFAM	7019	transcription factor A, mitochondrial	MTTF1|MTTFA|TCF6|TCF6L1|TCF6L2|TCF6L3	8	0	0.458402	-1.12532	0.0692307	1.1597
SFXN1	94081	sideroflexin 1	-	3	11	2.05589	1.03976	0.070629	1.15102
SFPQ	6421	splicing factor proline/glutamine-rich	POMP100|PPP1R140|PSF	16	3	0.342782	-1.54464	0.0711906	1.14758
NACA2	342538	nascent polypeptide-associated complex alpha subunit 2	ANAC|NACAL	0	4	1.99423	0.99583	0.0853502	1.0688
HNRNPAB	3182	heterogeneous nuclear ribonucleoprotein A/B	ABBP1|HNRPAB	23	15	0.689452	-0.536479	0.0870045	1.06046
PTBP3	9991	polypyrimidine tract binding protein 3	ROD1	6	2	0.583607	-0.776932	0.0887104	1.05203
CLPB	81570	ClpB caseinolytic peptidase B homolog (E. coli)	HSP78|SKD3	4	33	5.26639	2.39682	0.0947355	1.02349
PDIA6	10130	protein disulfide isomerase family A, member 6	ERP5|P5|TXNDC7	25	19	0.765273	-0.385954	0.0990152	1.0043
MRPS7	51081	mitochondrial ribosomal protein S7	MRP-S|MRP-S7|RP-S7|RPMS7|S7mt|bMRP27a	24	10	0.435239	-1.20012	0.100642	0.99722
RAB7A	7879	RAB7A, member RAS oncogene family	PRO2706|RAB7	0	4	2.06254	1.04442	0.101468	0.993671
ASB15	142685	ankyrin repeat and SOCS box containing 15	-	1	3	1.46682	0.55269	0.101626	0.992995
CHMP2A	27243	charged multivesicular body protein 2A	BC-2|BC2|CHMP2|VPS2|VPS2A	1	3	1.46682	0.55269	0.101626	0.992995
PIGT	51604	phosphatidylinositol glycan anchor biosynthesis, class T	CGI-06|MCAHS3|NDAP|PNH2	1	3	1.46682	0.55269	0.101626	0.992995
USMG5	84833	up-regulated during skeletal muscle growth 5 homolog (mouse)	DAPIT|HCVFTP2|bA792D24.4	1	3	1.46682	0.55269	0.101626	0.992995
HSPA1A	3303	heat shock 70kDa protein 1A	HEL-S-103|HSP70-1|HSP70-1A|HSP70I|HSP72|HSPA1	36	62	1.62683	0.702064	0.102702	0.98842
HSPA1B	3304	heat shock 70kDa protein 1B	HSP70-1B|HSP70-2	36	62	1.62683	0.702064	0.102702	0.98842
RAN	5901	RAN, member RAS oncogene family	ARA24|Gsp1|TC4	6	1	0.581927	-0.78109	0.104077	0.982646
AFG3L2	10939	AFG3-like AAA ATPase 2	SCA28|SPAX5	2	14	3.30573	1.72497	0.104255	0.981905
TIMM13	26517	translocase of inner mitochondrial membrane 13 homolog (yeast)	TIM13|TIM13B|TIMM13A|TIMM13B|ppv1	2	5	1.53839	0.62142	0.108193	0.9658
RPSA	3921	ribosomal protein SA	37LRP|67LR|ICAS|LAMBR|LAMR1|LBP|LBP/p40|LRP|LRP/LR|NEM/1CHD4|SA|lamR|p40	10	16	1.47742	0.563081	0.108959	0.962738
CDSN	1041	corneodesmosin	HTSS|HTSS1|HYPT2|PSS|PSS1|S	2	11	2.88265	1.52739	0.109245	0.961598
ARF1	375	ADP-ribosylation factor 1	-	4	9	1.62576	0.701114	0.109581	0.960264
ARF3	377	ADP-ribosylation factor 3	-	4	9	1.62576	0.701114	0.109581	0.960264
ARF5	381	ADP-ribosylation factor 5	-	4	9	1.62576	0.701114	0.109581	0.960264
MRPL13	28998	mitochondrial ribosomal protein L13	L13|L13A|L13mt|RPL13|RPML13	4	1	0.664223	-0.590259	0.113012	0.946874
MRPL22	29093	mitochondrial ribosomal protein L22	HSPC158|L22mt|MRP-L22|MRP-L25|RPML25	4	1	0.664223	-0.590259	0.113012	0.946874
LONP1	9361	lon peptidase 1, mitochondrial	CODASS|LON|LONP|LonHS|PIM1|PRSS15|hLON	1	6	2.05768	1.04102	0.114051	0.942902
KRT77	374454	keratin 77, type II	K1B|KRT1B	177	136	0.762872	-0.390486	0.117444	0.930171
ANXA1	301	annexin A1	ANX1|LPC1	0	6	2.44665	1.29081	0.117666	0.929348
BSG	682	basigin (Ok blood group)	5F7|CD147|EMMPRIN|M6|OK|TCSF	0	3	1.8106	0.856467	0.119271	0.923466
CCT6A	908	chaperonin containing TCP1, subunit 6A (zeta 1)	CCT-zeta|CCT-zeta-1|CCT6|Cctz|HTR3|MoDP-2|TCP-1-zeta|TCP20|TCPZ|TTCP20	0	3	1.8106	0.856467	0.119271	0.923466
CFL1	1072	cofilin 1 (non-muscle)	CFL|HEL-S-15	0	3	1.8106	0.856467	0.119271	0.923466
DYNC1LI1	51143	dynein, cytoplasmic 1, light intermediate chain 1	DNCLI1|LIC1	0	3	1.8106	0.856467	0.119271	0.923466
DYNLRB2	83657	dynein, light chain, roadblock-type 2	DNCL2B|DNLC2B|ROBLD2	0	3	1.8106	0.856467	0.119271	0.923466
FKBP8	23770	FK506 binding protein 8, 38kDa	FKBP38|FKBPr38	0	3	1.8106	0.856467	0.119271	0.923466
NDUFS2	4720	NADH dehydrogenase (ubiquinone) Fe-S protein 2, 49kDa (NADH-coenzyme Q reductase)	CI-49	0	3	1.8106	0.856467	0.119271	0.923466
SOD2	6648	superoxide dismutase 2, mitochondrial	IPOB|MNSOD|MVCD6	0	3	1.8106	0.856467	0.119271	0.923466
DDX39A	10212	DEAD (Asp-Glu-Ala-Asp) box polypeptide 39A	BAT1|BAT1L|DDX39|DDXL|URH49	9	4	0.585342	-0.772648	0.119552	0.922442
DYNLRB1	83658	dynein, light chain, roadblock-type 1	BITH|BLP|DNCL2A|DNLC2A|ROBLD1	0	4	2.10135	1.07132	0.119656	0.922066
IQGAP1	8826	IQ motif containing GTPase activating protein 1	HUMORFA01|SAR1|p195	1	7	2.12831	1.08971	0.121492	0.915453
HSPA1L	3305	heat shock 70kDa protein 1-like	HSP70-1L|HSP70-HOM|HSP70T|hum70t	31	48	1.45422	0.540246	0.127275	0.895257
HNRNPK	3190	heterogeneous nuclear ribonucleoprotein K	CSBP|HNRPK|TUNP	72	45	0.64668	-0.628876	0.128777	0.89016
GHITM	27069	growth hormone inducible transmembrane protein	DERP2|HSPC282|MICS1|My021|PTD010|TMBIM5	0	4	2.08677	1.06127	0.129056	0.889223
PPIB	5479	peptidylprolyl isomerase B (cyclophilin B)	CYP-S1|CYPB|HEL-S-39|OI9|SCYLP	8	5	0.723862	-0.466213	0.13092	0.882993
GSDMA	284110	gasdermin A	FKSG9|GSDM|GSDM1	4	1	0.669848	-0.578093	0.136341	0.865375
HSP90AA1	3320	heat shock protein 90kDa alpha (cytosolic), class A member 1	EL52|HSP86|HSP89A|HSP90A|HSP90N|HSPC1|HSPCA|HSPCAL1|HSPCAL4|HSPN|Hsp89|Hsp90|LAP-2|LAP2	41	57	1.33098	0.412494	0.137322	0.862261
CCDC124	115098	coiled-coil domain containing 124	-	3	1	0.723672	-0.466592	0.137456	0.861837
SLC25A1	6576	solute carrier family 25 (mitochondrial carrier; citrate transporter), member 1	CTP|D2L2AD|SEA|SLC20A3	3	1	0.723672	-0.466592	0.137456	0.861837
BCLAF1	9774	BCL2-associated transcription factor 1	BTF|bK211L9.1	2	0	0.67363	-0.569972	0.137613	0.86134
HMGB1	3146	high mobility group box 1	HMG1|HMG3|SBP-1	2	0	0.67363	-0.569972	0.137613	0.86134
IRS4	8471	insulin receptor substrate 4	IRS-4|PY160	2	0	0.67363	-0.569972	0.137613	0.86134
KIF5A	3798	kinesin family member 5A	D12S1889|MY050|NKHC|SPG10	2	0	0.67363	-0.569972	0.137613	0.86134
KIF5B	3799	kinesin family member 5B	HEL-S-61|KINH|KNS|KNS1|UKHC	2	0	0.67363	-0.569972	0.137613	0.86134
KIF5C	3800	kinesin family member 5C	CDCBM2|KINN|NKHC|NKHC-2|NKHC2	2	0	0.67363	-0.569972	0.137613	0.86134
MRPL17	63875	mitochondrial ribosomal protein L17	L17mt|LIP2|MRP-L17|MRP-L26|RPL17L|RPML26	2	0	0.67363	-0.569972	0.137613	0.86134
PDAP1	11333	PDGFA associated protein 1	HASPP28|PAP|PAP1	2	0	0.67363	-0.569972	0.137613	0.86134
PSPC1	55269	paraspeckle component 1	PSP1	2	0	0.67363	-0.569972	0.137613	0.86134
SEC13	6396	SEC13 homolog (S. cerevisiae)	D3S1231E|SEC13L1|SEC13R|npp-20	2	0	0.67363	-0.569972	0.137613	0.86134
TIAL1	7073	TIA1 cytotoxic granule-associated RNA binding protein-like 1	TCBP|TIAR	2	0	0.67363	-0.569972	0.137613	0.86134
HBA1	3039	hemoglobin, alpha 1	HBA-T3|HBH	4	0	0.597922	-0.741971	0.137709	0.861039
HBA2	3040	hemoglobin, alpha 2	HBA-T2|HBH	4	0	0.597922	-0.741971	0.137709	0.861039
DDX39B	7919	DEAD (Asp-Glu-Ala-Asp) box polypeptide 39B	BAT1|D6S81E|UAP56	10	4	0.554164	-0.851615	0.137775	0.86083
KRT72	140807	keratin 72, type II	K6IRS2|K6irs|KRT6|KRT6IRS2	92	63	0.684315	-0.547268	0.139302	0.856041
FUBP3	8939	far upstream element (FUSE) binding protein 3	FBP3	9	0	0.458029	-1.12649	0.140233	0.853149
MRPS5	64969	mitochondrial ribosomal protein S5	MRP-S5|S5mt	5	1	0.635835	-0.653275	0.141088	0.85051
RPS7	6201	ribosomal protein S7	DBA8|S7	5	1	0.635835	-0.653275	0.141088	0.85051
KHSRP	8570	KH-type splicing regulatory protein	FBP2|FUBP2|KSRP	31	20	0.634497	-0.656315	0.142755	0.845409
MRPS15	64960	mitochondrial ribosomal protein S15	DC37|MPR-S15|RPMS15|S15mt	10	5	0.595192	-0.748573	0.143897	0.84195
PHB2	11331	prohibitin 2	BAP|BCAP37|Bap37|PNAS-141|REA|p22	43	103	2.22296	1.15248	0.144232	0.840937
VDAC3	7419	voltage-dependent anion channel 3	HD-VDAC3|VDAC-3	10	22	2.20778	1.1426	0.146325	0.834681
ATAD3A	55210	ATPase family, AAA domain containing 3A	-	7	19	3.15984	1.65985	0.14878	0.827456
COX4I1	1327	cytochrome c oxidase subunit IV isoform 1	COX4|COX4-1|COXIV	4	7	1.4399	0.525967	0.150353	0.822888
SNRPA	6626	small nuclear ribonucleoprotein polypeptide A	Mud1|U1-A|U1A	4	1	0.584904	-0.773728	0.150927	0.821234
KRT71	112802	keratin 71, type II	HYPT13|K6IRS1|KRT6IRS|KRT6IRS1	66	44	0.665378	-0.587754	0.151373	0.819952
MATR3	9782	matrin 3	ALS21|MPD2|VCPDM	17	6	0.425876	-1.23149	0.151657	0.819137
PTBP1	5725	polypyrimidine tract binding protein 1	HNRNP-I|HNRNPI|HNRPI|PTB|PTB-1|PTB-T|PTB2|PTB3|PTB4|pPTB	30	10	0.434423	-1.20283	0.151659	0.819132
MRPS11	64963	mitochondrial ribosomal protein S11	HCC-2	5	3	0.758581	-0.398625	0.152813	0.815841
CKAP4	10970	cytoskeleton-associated protein 4	CLIMP-63|ERGIC-63|p63	21	13	0.683165	-0.549694	0.153178	0.814803
CANX	821	calnexin	CNX|IP90|P90	18	26	1.32935	0.410716	0.153491	0.813917
TRAP1	10131	TNF receptor-associated protein 1	HSP 75|HSP75|HSP90L|TRAP-1	31	49	1.49915	0.584141	0.155029	0.809588
ACTBL2	345651	actin, beta-like 2	ACT	8	14	1.53581	0.619002	0.156102	0.806593
SLC1A5	6510	solute carrier family 1 (neutral amino acid transporter), member 5	AAAT|ASCT2|ATBO|M7V1|M7VS1|R16|RDRC	1	4	1.64301	0.716344	0.157247	0.803417
EIF3L	51386	eukaryotic translation initiation factor 3, subunit L	EIF3EIP|EIF3S11|EIF3S6IP|HSPC021|HSPC025|MSTP005	9	3	0.621301	-0.686637	0.163947	0.785296
BUB3	9184	BUB3 mitotic checkpoint protein	BUB3L|hBUB3	3	0	0.619807	-0.69011	0.16437	0.784177
IARS2	55699	isoleucyl-tRNA synthetase 2, mitochondrial	CAGSSS|ILERS	3	0	0.619807	-0.69011	0.16437	0.784177
TST	7263	thiosulfate sulfurtransferase (rhodanese)	RDS	3	0	0.619807	-0.69011	0.16437	0.784177
KRT74	121391	keratin 74, type II	ADWH|HTSS2|HYPT3|K6IRS4|KRT5C|KRT6IRS4	79	57	0.728427	-0.457145	0.165533	0.781115
RPS27A	6233	ribosomal protein S27a	CEP80|HEL112|S27A|UBA80|UBC|UBCEP1|UBCEP80	9	12	1.3889	0.473947	0.170376	0.768591
UBA52	7311	ubiquitin A-52 residue ribosomal protein fusion product 1	CEP52|HUBCEP52|L40|RPL40	9	12	1.3889	0.473947	0.170376	0.768591
UBB	7314	ubiquitin B	-	9	12	1.3889	0.473947	0.170376	0.768591
UBC	7316	ubiquitin C	HMG20	9	12	1.3889	0.473947	0.170376	0.768591
TIMM50	92609	translocase of inner mitochondrial membrane 50 homolog (S. cerevisiae)	TIM50|TIM50L	7	12	1.66538	0.735849	0.176332	0.75367
MRPS35	60488	mitochondrial ribosomal protein S35	HDCMD11P|MDS023|MRP-S28|MRPS28	19	11	0.560958	-0.834036	0.177008	0.752006
TUBA4A	7277	tubulin, alpha 4a	ALS22|H2-ALPHA|TUBA1	7	3	0.776012	-0.365849	0.179151	0.74678
TUBA8	51807	tubulin, alpha 8	TUBAL2	7	3	0.776012	-0.365849	0.179151	0.74678
PRDX1	5052	peroxiredoxin 1	MSP23|NKEF-A|NKEFA|PAG|PAGA|PAGB|PRX1|PRXI|TDPX2	32	28	0.894592	-0.160698	0.180809	0.742781
ATAD3C	219293	ATPase family, AAA domain containing 3C	-	5	10	2.22394	1.15312	0.184296	0.734484
KRT16	3868	keratin 16, type I	CK16|FNEPPK|K16|K1CP|KRT16A|NEPPK|PC1	515	411	0.78366	-0.3517	0.187346	0.727355
AP1B1	162	adaptor-related protein complex 1, beta 1 subunit	ADTB1|AP105A|BAM22|CLAPB2	1	4	1.55284	0.634909	0.187508	0.72698
AP2A1	160	adaptor-related protein complex 2, alpha 1 subunit	ADTAA|AP2-ALPHA|CLAPA1	1	4	1.55284	0.634909	0.187508	0.72698
G3BP1	10146	GTPase activating protein (SH3 domain) binding protein 1	G3BP|HDH-VIII	6	2	0.654725	-0.611039	0.188318	0.725107
TGM1	7051	transglutaminase 1	ARCI1|ICR2|KTG|LI|LI1|TGASE|TGK	5	9	1.95662	0.968362	0.188535	0.724607
LETM1	3954	leucine zipper-EF-hand containing transmembrane protein 1	-	4	13	2.02132	1.0153	0.18872	0.724183
FASN	2194	fatty acid synthase	FAS|OA-519|SDR27X1	45	74	1.69517	0.761426	0.190499	0.720107
RPS10-NUDT3	100529239	RPS10-NUDT3 readthrough	-	5	9	1.8258	0.868528	0.191639	0.717516
PCBP3	54039	poly(rC) binding protein 3	ALPHA-CP3	7	3	0.644941	-0.63276	0.1957	0.708409
DARS2	55157	aspartyl-tRNA synthetase 2, mitochondrial	ASPRS|LBSL|MT-ASPRS	5	1	0.69864	-0.517379	0.195959	0.707835
EIF3E	3646	eukaryotic translation initiation factor 3, subunit E	EIF3-P48|EIF3S6|INT6|eIF3-p46	5	1	0.69864	-0.517379	0.195959	0.707835
VDAC1	7416	voltage-dependent anion channel 1	PORIN|VDAC-1	21	41	1.9142	0.936741	0.20102	0.69676
RAB2A	5862	RAB2A, member RAS oncogene family	LHX|RAB2	0	3	1.77032	0.82401	0.201069	0.696655
MRPS25	64432	mitochondrial ribosomal protein S25	MRP-S25|RPMS25	9	3	0.82782	-0.272612	0.202186	0.69425
LTF	4057	lactotransferrin	GIG12|HEL110|HLF2|LF	7	2	0.890807	-0.166815	0.203475	0.691489
FUBP1	8880	far upstream element (FUSE) binding protein 1	FBP|FUBP|hDH V	16	7	0.48991	-1.02941	0.204752	0.688772
ATAD3B	83858	ATPase family, AAA domain containing 3B	AAA-TOB3|TOB3	4	11	2.19419	1.13369	0.207986	0.681966
AP2A2	161	adaptor-related protein complex 2, alpha 2 subunit	ADTAB|CLAPA2|HIP-9|HIP9|HYPJ	1	3	1.39107	0.4762	0.208931	0.679998
MRPL18	29074	mitochondrial ribosomal protein L18	HSPC071|L18mt|MRP-L18	1	3	1.39107	0.4762	0.208931	0.679998
NDUFAF4	29078	NADH dehydrogenase (ubiquinone) complex I, assembly factor 4	C6orf66|HRPAP20|HSPC125|My013|bA22L21.1	1	3	1.39107	0.4762	0.208931	0.679998
VAPA	9218	VAMP (vesicle-associated membrane protein)-associated protein A, 33kDa	VAP-33|VAP-A|VAP33|hVAP-33	1	3	1.39107	0.4762	0.208931	0.679998
HNRNPA3	220988	heterogeneous nuclear ribonucleoprotein A3	2610510D13Rik|D10S102|FBRNP|HNRPA3	23	8	0.506307	-0.981915	0.210034	0.677711
ENO1	2023	enolase 1, (alpha)	ENO1L1|MPB1|NNE|PPH	14	24	1.49414	0.57932	0.210173	0.677424
FUS	2521	FUS RNA binding protein	ALS6|ETM4|FUS1|HNRNPP2|POMP75|TLS	8	2	0.602795	-0.730261	0.214048	0.66949
PTCD3	55037	pentatricopeptide repeat domain 3	MRP-S39	34	27	0.819103	-0.287883	0.215068	0.667424
GBAS	2631	glioblastoma amplified sequence	NIPSNAP2	4	2	0.812152	-0.300178	0.215286	0.666984
MRPS9	64965	mitochondrial ribosomal protein S9	MRP-S9|RPMS9|S9mt	22	11	0.467791	-1.09606	0.216609	0.664324
ACAP2	23527	ArfGAP with coiled-coil, ankyrin repeat and PH domains 2	CENTB2|CNT-B2	4	1	0.654892	-0.61067	0.217071	0.663398
ANK2	287	ankyrin 2, neuronal	ANK-2|LQT4|brank-2	0	2	1.51838	0.602535	0.218052	0.66144
BCL2L2-PABPN1	100529063	BCL2L2-PABPN1 readthrough	-	0	2	1.51838	0.602535	0.218052	0.66144
CORO7-PAM16	100529144	CORO7-PAM16 readthrough	-	0	2	1.51838	0.602535	0.218052	0.66144
COX6C	1345	cytochrome c oxidase subunit VIc	-	0	2	1.51838	0.602535	0.218052	0.66144
CROCC	9696	ciliary rootlet coiled-coil, rootletin	ROLT	0	2	1.51838	0.602535	0.218052	0.66144
GDI1	2664	GDP dissociation inhibitor 1	1A|GDIL|MRX41|MRX48|OPHN2|RABGD1A|RABGDIA|XAP-4	0	2	1.51838	0.602535	0.218052	0.66144
GLRX5	51218	glutaredoxin 5	C14orf87|FLB4739|GRX5|PR01238|PRO1238|PRSA	0	2	1.51838	0.602535	0.218052	0.66144
NSF	4905	N-ethylmaleimide-sensitive factor	SKD2	0	2	1.51838	0.602535	0.218052	0.66144
OSBPL8	114882	oxysterol binding protein-like 8	MST120|MSTP120|ORP8|OSBP10	0	2	1.51838	0.602535	0.218052	0.66144
PAM16	51025	presequence translocase-associated motor 16 homolog (S. cerevisiae)	CGI-136|MAGMAS|TIM16|TIMM16	0	2	1.51838	0.602535	0.218052	0.66144
SLC25A12	8604	solute carrier family 25 (aspartate/glutamate carrier), member 12	AGC1|ARALAR	0	2	1.51838	0.602535	0.218052	0.66144
TXNDC12	51060	thioredoxin domain containing 12 (endoplasmic reticulum)	AG1|AGR1|ERP16|ERP18|ERP19|PDIA16|TLP19|hAG-1|hTLP19	0	2	1.51838	0.602535	0.218052	0.66144
NDUFAF3	25915	NADH dehydrogenase (ubiquinone) complex I, assembly factor 3	2P1|C3orf60|E3-3	3	6	1.55289	0.634954	0.219635	0.658298
CNP	1267	2',3'-cyclic nucleotide 3' phosphodiesterase	CNP1	2	0	0.751809	-0.411562	0.219721	0.658128
FASTKD1	79675	FAST kinase domains 1	-	2	0	0.751809	-0.411562	0.219721	0.658128
GLG1	2734	golgi glycoprotein 1	CFR-1|ESL-1|MG-160|MG160	2	0	0.751809	-0.411562	0.219721	0.658128
MRPS16	51021	mitochondrial ribosomal protein S16	CGI-132|COXPD2|MRP-S16|RPMS16	2	0	0.751809	-0.411562	0.219721	0.658128
NDUFA2	4695	NADH dehydrogenase (ubiquinone) 1 alpha subcomplex, 2, 8kDa	B8|CD14|CIB8	2	0	0.751809	-0.411562	0.219721	0.658128
PTCD2	79810	pentatricopeptide repeat domain 2	-	2	0	0.751809	-0.411562	0.219721	0.658128
RGPD1	400966	RANBP2-like and GRIP domain containing 1	RGP1|RGPD2|RanBP2L2	2	0	0.751809	-0.411562	0.219721	0.658128
RGPD2	729857	RANBP2-like and GRIP domain containing 2	NUP358|RANBP2L2|RGP2	2	0	0.751809	-0.411562	0.219721	0.658128
RGPD3	653489	RANBP2-like and GRIP domain containing 3	RGP3	2	0	0.751809	-0.411562	0.219721	0.658128
RGPD4	285190	RANBP2-like and GRIP domain containing 4	RGP4	2	0	0.751809	-0.411562	0.219721	0.658128
RPUSD3	285367	RNA pseudouridylate synthase domain containing 3	-	2	0	0.751809	-0.411562	0.219721	0.658128
WARS2	10352	tryptophanyl tRNA synthetase 2, mitochondrial	TrpRS	2	0	0.751809	-0.411562	0.219721	0.658128
KRT73	319101	keratin 73, type II	IRT6IRS3|K6IRS3|KRT6IRS3	78	58	0.750875	-0.413354	0.219866	0.657842
RPS16	6217	ribosomal protein S16	S16	2	0	0.702534	-0.509361	0.219931	0.657713
CKM	1158	creatine kinase, muscle	CKMM|M-CK	4	0	0.624791	-0.678554	0.220635	0.656326
ALDH7A1	501	aldehyde dehydrogenase 7 family, member A1	ATQ1|EPD|PDE	2	6	1.58017	0.660081	0.221904	0.653836
COX2	4513	cytochrome c oxidase subunit II	COII|MTCO2	2	6	1.58017	0.660081	0.221904	0.653836
RPS3	6188	ribosomal protein S3	S3	12	6	0.577549	-0.791986	0.222521	0.652629
HBB	3043	hemoglobin, beta	CD113t-C|beta-globin	12	4	0.639317	-0.645396	0.224811	0.648183
HNRNPLL	92906	heterogeneous nuclear ribonucleoprotein L-like	HNRPLL|SRRF	3	1	0.681952	-0.552258	0.228552	0.641015
SLC25A13	10165	solute carrier family 25 (aspartate/glutamate carrier), member 13	ARALAR2|CITRIN|CTLN2	0	5	2.27516	1.18597	0.231451	0.635541
HNRNPDL	9987	heterogeneous nuclear ribonucleoprotein D-like	HNRNP|HNRPDL|JKTBP|JKTBP2|LGMD1G|laAUF1	10	5	0.711399	-0.491269	0.235207	0.62855
KRT25	147183	keratin 25, type I	KRT25A	125	105	0.824951	-0.277619	0.236611	0.625964
KRT84	3890	keratin 84, type II	HB4|KRTHB4	58	32	0.54995	-0.862629	0.237806	0.623777
S100A9	6280	S100 calcium binding protein A9	60B8AG|CAGB|CFAG|CGLB|L1AG|LIAG|MAC387|MIF|MRP14|NIF|P14	2	5	1.49415	0.579325	0.237848	0.623701
DDX17	10521	DEAD (Asp-Glu-Ala-Asp) box helicase 17	P72|RH70	44	20	0.430669	-1.21535	0.240922	0.618123
DCTN2	10540	dynactin 2 (p50)	DCTN50|DYNAMITIN|HEL-S-77|RBP50	4	9	1.56728	0.648266	0.24628	0.608571
HNRNPA1	3178	heterogeneous nuclear ribonucleoprotein A1	ALS19|ALS20|HNRPA1|HNRPA1L3|IBMPFD3|hnRNP A1|hnRNP-A1	26	14	0.631538	-0.663059	0.249724	0.60254
KRT27	342574	keratin 27, type I	KRT25C	125	106	0.832638	-0.264238	0.253403	0.596188
RPL11	6135	ribosomal protein L11	DBA7|GIG34|L11	9	11	1.14204	0.191607	0.255778	0.592137
PZP	5858	pregnancy-zone protein	CPAMD6	28	18	0.757215	-0.401226	0.258919	0.586837
EIF3C	8663	eukaryotic translation initiation factor 3, subunit C	EIF3CL|EIF3S8|eIF3-p110	6	2	0.661133	-0.596987	0.25894	0.586801
EIF3CL	728689	eukaryotic translation initiation factor 3, subunit C-like	-	6	2	0.661133	-0.596987	0.25894	0.586801
PCBP1	5093	poly(rC) binding protein 1	HEL-S-85|HNRPE1|HNRPX|hnRNP-E1|hnRNP-X	9	5	0.743191	-0.428195	0.259331	0.586146
GAPDH	2597	glyceraldehyde-3-phosphate dehydrogenase	G3PD|GAPD|HEL-S-162eP	75	62	0.817078	-0.291454	0.259526	0.585819
KBTBD3	143879	kelch repeat and BTB (POZ) domain containing 3	BKLHD3	3	1	0.939459	-0.0900976	0.261073	0.583238
CSTA	1475	cystatin A (stefin A)	AREI|STF1|STFA	8	14	1.48494	0.570403	0.261331	0.58281
MYH10	4628	myosin, heavy chain 10, non-muscle	NMMHC-IIB|NMMHCB	6	13	1.71146	0.775232	0.271259	0.566616
MYH1	4619	myosin, heavy chain 1, skeletal muscle, adult	HEL71|MYHSA1|MYHa|MyHC-2X/D|MyHC-2x	0	2	1.46596	0.551844	0.272094	0.565281
DBT	1629	dihydrolipoamide branched chain transacylase E2	BCATE2|BCKAD-E2|BCKADE2|BCOADC-E2|E2|E2B	6	3	0.740598	-0.433238	0.272288	0.564972
HSD17B10	3028	hydroxysteroid (17-beta) dehydrogenase 10	17b-HSD10|ABAD|CAMR|DUPXp11.22|ERAB|HADH2|HCD2|MHBD|MRPP2|MRX17|MRX31|MRXS10|SCHAD|SDR5C1	29	19	0.596896	-0.744447	0.272365	0.564849
PFN1	5216	profilin 1	ALS18	5	13	2.11294	1.07925	0.273433	0.563149
PABPC1L	80336	poly(A) binding protein, cytoplasmic 1-like	C20orf119|PABPC1L1|dJ1069P2.3|ePAB	5	2	0.697323	-0.520101	0.273471	0.563088
SLIRP	81892	SRA stem-loop interacting RNA binding protein	C14orf156|DC50|PD04872	33	29	0.879942	-0.18452	0.27392	0.562376
NUDT21	11051	nudix (nucleoside diphosphate linked moiety X)-type motif 21	CFIM25|CPSF5	7	3	0.710426	-0.493243	0.278628	0.554976
NCL	4691	nucleolin	C23	3	1	0.781571	-0.355551	0.279493	0.553629
TAF15	8148	TAF15 RNA polymerase II, TATA box binding protein (TBP)-associated factor, 68kDa	Npl3|RBP56|TAF2N|TAFII68	6	1	0.723502	-0.466931	0.283943	0.54677
RCN2	5955	reticulocalbin 2, EF-hand calcium binding domain	E6BP|ERC-55|ERC55|TCBP49	7	3	0.804547	-0.313752	0.290002	0.5376
HNRNPL	3191	heterogeneous nuclear ribonucleoprotein L	HNRPL|P/OKcl.14|hnRNP-L	31	13	0.421429	-1.24664	0.292348	0.5341
PPIA	5478	peptidylprolyl isomerase A (cyclophilin A)	CYPA|CYPH|HEL-S-69p	8	4	0.612326	-0.707629	0.292502	0.533871
RPS12	6206	ribosomal protein S12	S12	8	4	0.78306	-0.352805	0.292767	0.533478
ACAA2	10449	acetyl-CoA acyltransferase 2	DSAEC	1	4	1.69761	0.763504	0.293843	0.531885
RPL22	6146	ribosomal protein L22	EAP|HBP15|HBP15/L22|L22	5	3	0.787578	-0.344505	0.295619	0.529267
CLNS1A	1207	chloride channel, nucleotide-sensitive, 1A	CLCI|CLNS1B|ICln	1	4	1.77076	0.824367	0.296832	0.527489
EIF3A	8661	eukaryotic translation initiation factor 3, subunit A	EIF3|EIF3S10|P167|TIF32|eIF3-p170|eIF3-theta|p180|p185	0	6	2.72216	1.44475	0.298351	0.525273
CKMT1A	548596	creatine kinase, mitochondrial 1A	CKMT1	8	6	0.79319	-0.334261	0.299057	0.524246
CKMT1B	1159	creatine kinase, mitochondrial 1B	CKMT|CKMT1|UMTCK	8	6	0.79319	-0.334261	0.299057	0.524246
EEA1	8411	early endosome antigen 1	MST105|MSTP105|ZFYVE2	0	5	2.42994	1.28092	0.300168	0.522636
RMND1	55005	required for meiotic nuclear division 1 homolog (S. cerevisiae)	C6orf96|COXPD11|RMD1|bA351K16|bA351K16.3	0	5	2.42994	1.28092	0.300168	0.522636
SLC25A5	292	solute carrier family 25 (mitochondrial carrier; adenine nucleotide translocator), member 5	2F1|AAC2|ANT2|T2|T3	9	16	1.46746	0.553317	0.301591	0.520581
EIF3G	8666	eukaryotic translation initiation factor 3, subunit G	EIF3-P42|EIF3S4|eIF3-delta|eIF3-p44	0	4	2.13919	1.09706	0.305202	0.515413
ATP5O	539	ATP synthase, H+ transporting, mitochondrial F1 complex, O subunit	ATPO|OSCP	13	9	0.692019	-0.531116	0.305663	0.514756
RALY	22913	RALY heterogeneous nuclear ribonucleoprotein	HNRPCL2|P542	9	3	0.630422	-0.665611	0.306067	0.514183
SF3B2	10992	splicing factor 3b, subunit 2, 145kDa	Cus1|SAP145|SF3B145|SF3b1|SF3b150	6	0	0.713943	-0.486119	0.307649	0.511945
SRSF1	6426	serine/arginine-rich splicing factor 1	ASF|SF2|SF2p33|SFRS1|SRp30a	6	0	0.713943	-0.486119	0.307649	0.511945
DCD	117159	dermcidin	AIDD|DCD-1|DSEP|HCAP|PIF	74	99	1.29547	0.373477	0.309453	0.509406
SF3A1	10291	splicing factor 3a, subunit 1, 120kDa	PRP21|PRPF21|SAP114|SF3A120	7	1	0.596517	-0.745366	0.30947	0.509382
IDH3A	3419	isocitrate dehydrogenase 3 (NAD+) alpha	-	2	4	1.48133	0.566892	0.312278	0.505459
PEX14	5195	peroxisomal biogenesis factor 14	NAPP2|PBD13A|Pex14p|dJ734G22.2	1	3	1.48043	0.566017	0.312649	0.504943
DHX15	1665	DEAH (Asp-Glu-Ala-His) box helicase 15	DBP1|DDX15|HRH2|PRP43|PRPF43|PrPp43p	4	0	0.734619	-0.444931	0.312919	0.504569
SNRNP200	23020	small nuclear ribonucleoprotein 200kDa (U5)	ASCC3L1|BRR2|HELIC2|RP33|U5-200KD	4	0	0.734619	-0.444931	0.312919	0.504569
SRSF9	8683	serine/arginine-rich splicing factor 9	SFRS9|SRp30c	4	0	0.734619	-0.444931	0.312919	0.504569
HNRNPF	3185	heterogeneous nuclear ribonucleoprotein F	HNRPF|OK/SW-cl.23|mcs94-1	11	5	0.566269	-0.820441	0.31584	0.500533
EEF1A1	1915	eukaryotic translation elongation factor 1 alpha 1	CCS-3|CCS3|EE1A1|EEF-1|EEF1A|EF-Tu|EF1A|GRAF-1EF|HNGC:16303|LENG7|PTI1|eEF1A-1	57	46	0.889656	-0.16868	0.317471	0.498295
SLC25A4	291	solute carrier family 25 (mitochondrial carrier; adenine nucleotide translocator), member 4	1|AAC1|ANT|ANT 1|ANT1|MTDPS12|PEO2|PEO3|T1	9	15	1.40925	0.494932	0.318937	0.496295
HIST1H2BB	3018	histone cluster 1, H2bb	H2B.1|H2B/f|H2BFF	17	25	1.50921	0.593793	0.319404	0.49566
HIST1H2BC	8347	histone cluster 1, H2bc	H2B.1|H2B/l|H2BFL|dJ221C16.3	17	25	1.50921	0.593793	0.319404	0.49566
HIST1H2BD	3017	histone cluster 1, H2bd	H2B.1B|H2B/b|H2BFB|HIRIP2|dJ221C16.6	17	25	1.50921	0.593793	0.319404	0.49566
HIST1H2BE	8344	histone cluster 1, H2be	H2B.h|H2B/h|H2BFH|dJ221C16.8	17	25	1.50921	0.593793	0.319404	0.49566
HIST1H2BF	8343	histone cluster 1, H2bf	H2B/g|H2BFG	17	25	1.50921	0.593793	0.319404	0.49566
HIST1H2BG	8339	histone cluster 1, H2bg	H2B.1A|H2B/a|H2BFA|dJ221C16.8	17	25	1.50921	0.593793	0.319404	0.49566
HIST1H2BH	8345	histone cluster 1, H2bh	H2B/j|H2BFJ	17	25	1.50921	0.593793	0.319404	0.49566
HIST1H2BI	8346	histone cluster 1, H2bi	H2B/k|H2BFK	17	25	1.50921	0.593793	0.319404	0.49566
HIST1H2BJ	8970	histone cluster 1, H2bj	H2B/r|H2BFR|H2BJ	17	25	1.50921	0.593793	0.319404	0.49566
HIST1H2BK	85236	histone cluster 1, H2bk	H2B/S|H2BFAiii|H2BFT|H2BK	17	25	1.50921	0.593793	0.319404	0.49566
HIST1H2BL	8340	histone cluster 1, H2bl	H2B/c|H2BFC|dJ97D16.4	17	25	1.50921	0.593793	0.319404	0.49566
HIST1H2BM	8342	histone cluster 1, H2bm	H2B/e|H2BFE|dJ160A22.3	17	25	1.50921	0.593793	0.319404	0.49566
HIST1H2BN	8341	histone cluster 1, H2bn	H2B/d|H2BFD	17	25	1.50921	0.593793	0.319404	0.49566
HIST1H2BO	8348	histone cluster 1, H2bo	H2B.2|H2B/n|H2BFN|dJ193B12.2	17	25	1.50921	0.593793	0.319404	0.49566
HIST2H2BE	8349	histone cluster 2, H2be	GL105|H2B|H2B.1|H2BFQ|H2BGL105|H2BQ	17	25	1.50921	0.593793	0.319404	0.49566
HIST2H2BF	440689	histone cluster 2, H2bf	-	17	25	1.50921	0.593793	0.319404	0.49566
HIST3H2BB	128312	histone cluster 3, H2bb	H2Bb	17	25	1.50921	0.593793	0.319404	0.49566
LOC102724334	102724334	histone H2B type F-S-like	-	17	25	1.50921	0.593793	0.319404	0.49566
ASAH1	427	N-acylsphingosine amidohydrolase (acid ceramidase) 1	AC|ACDase|ASAH|PHP|PHP32|SMAPME	0	3	1.84844	0.886309	0.319762	0.495174
BOD1L1	259282	biorientation of chromosomes in cell division 1-like 1	BOD1L|FAM44A	0	3	1.84844	0.886309	0.319762	0.495174
MRPL14	64928	mitochondrial ribosomal protein L14	L14mt|L32mt|MRP-L14|MRP-L32|MRPL32|RMPL32|RPML32	0	3	1.84844	0.886309	0.319762	0.495174
RAB10	10890	RAB10, member RAS oncogene family	-	0	3	1.84844	0.886309	0.319762	0.495174
ADAR	103	adenosine deaminase, RNA-specific	ADAR1|AGS6|DRADA|DSH|DSRAD|G1P1|IFI-4|IFI4|K88DSRBP|P136	3	0	0.752238	-0.410739	0.320726	0.493866
PRPSAP2	5636	phosphoribosyl pyrophosphate synthetase-associated protein 2	PAP41	3	0	0.752238	-0.410739	0.320726	0.493866
VAPB	9217	VAMP (vesicle-associated membrane protein)-associated protein B and C	ALS8|VAMP-B|VAP-B	2	5	1.4535	0.53953	0.320994	0.493503
PPP1CC	5501	protein phosphatase 1, catalytic subunit, gamma isozyme	PP-1G|PP1C|PPP1G	4	2	0.750259	-0.41454	0.323232	0.490486
LYZ	4069	lysozyme	LZM	11	17	1.39698	0.482313	0.324602	0.488649
HSPA6	3310	heat shock 70kDa protein 6 (HSP70B')	-	10	18	1.55528	0.63717	0.327108	0.485308
CCT5	22948	chaperonin containing TCP1, subunit 5 (epsilon)	CCT-epsilon|CCTE|HEL-S-69|TCP-1-epsilon	6	4	0.774972	-0.367783	0.330593	0.480706
HNRNPA2B1	3181	heterogeneous nuclear ribonucleoprotein A2/B1	HNRNPA2|HNRNPB1|HNRPA2|HNRPA2B1|HNRPB1|IBMPFD2|RNPA2|SNRPB1	35	17	0.662777	-0.593404	0.331048	0.480109
KRT17	3872	keratin 17, type I	K17|PC|PC2|PCHC1	244	203	0.823679	-0.279846	0.331782	0.479148
ELAVL1	1994	ELAV like RNA binding protein 1	ELAV1|HUR|Hua|MelG	7	3	0.684244	-0.547418	0.3339	0.476383
NONO	4841	non-POU domain containing, octamer-binding	NMT55|NRB54|P54|P54NRB|PPP1R114	14	3	0.625948	-0.675886	0.334167	0.476037
HACD3	51495	3-hydroxyacyl-CoA dehydratase 3	B-IND1|BIND1|HSPC121|PTPLAD1	2	1	0.835395	-0.25947	0.33451	0.475591
HMOX2	3163	heme oxygenase (decycling) 2	HO-2	2	1	0.835395	-0.25947	0.33451	0.475591
PSMB1	5689	proteasome (prosome, macropain) subunit, beta type, 1	HC5|PMSB1|PSC5	2	1	0.835395	-0.25947	0.33451	0.475591
PSMC2	5701	proteasome (prosome, macropain) 26S subunit, ATPase, 2	MSS1|Nbla10058|S7	2	1	0.835395	-0.25947	0.33451	0.475591
SARNP	84324	SAP domain containing ribonucleoprotein	CIP29|HCC1|HSPC316|THO1	4	1	0.665566	-0.587347	0.335609	0.474167
TARDBP	23435	TAR DNA binding protein	ALS10|TDP-43	4	1	0.665566	-0.587347	0.335609	0.474167
TIMM44	10469	translocase of inner mitochondrial membrane 44 homolog (yeast)	TIM44	1	4	1.84857	0.886411	0.339106	0.469664
CSTF3	1479	cleavage stimulation factor, 3' pre-RNA, subunit 3, 77kDa	CSTF-77	2	0	0.780711	-0.357139	0.342206	0.465712
DES	1674	desmin	CSM1|CSM2|LGMD2R	2	0	0.780711	-0.357139	0.342206	0.465712
EFTUD2	9343	elongation factor Tu GTP binding domain containing 2	MFDGA|MFDM|SNRNP116|Snrp116|Snu114|U5-116KD	2	0	0.780711	-0.357139	0.342206	0.465712
ERLIN2	11160	ER lipid raft associated 2	C8orf2|Erlin-2|NET32|SPFH2|SPG18	2	0	0.780711	-0.357139	0.342206	0.465712
FAM98B	283742	family with sequence similarity 98, member B	-	2	0	0.780711	-0.357139	0.342206	0.465712
HIBCH	26275	3-hydroxyisobutyryl-CoA hydrolase	HIBYLCOAH	2	0	0.780711	-0.357139	0.342206	0.465712
LDHB	3945	lactate dehydrogenase B	HEL-S-281|LDH-B|LDH-H|LDHBD|TRG-5	2	0	0.780711	-0.357139	0.342206	0.465712
MAGOH	4116	mago-nashi homolog, proliferation-associated (Drosophila)	MAGOH1|MAGOHA	2	0	0.780711	-0.357139	0.342206	0.465712
PUF60	22827	poly-U binding splicing factor 60KDa	FIR|RoBPI|SIAHBP1|VRJS	2	0	0.780711	-0.357139	0.342206	0.465712
RBM10	8241	RNA binding motif protein 10	DXS8237E|GPATC9|GPATCH9|S1-1|TARPS|ZRANB5	2	0	0.780711	-0.357139	0.342206	0.465712
RBM4	5936	RNA binding motif protein 4	LARK|RBM4A|ZCCHC21|ZCRB3A	2	0	0.780711	-0.357139	0.342206	0.465712
RCN1	5954	reticulocalbin 1, EF-hand calcium binding domain	HEL-S-84|PIG20|RCAL|RCN	2	0	0.780711	-0.357139	0.342206	0.465712
SF3B1	23451	splicing factor 3b, subunit 1, 155kDa	Hsh155|MDS|PRP10|PRPF10|SAP155|SF3b155	2	0	0.780711	-0.357139	0.342206	0.465712
SNRPD2	6633	small nuclear ribonucleoprotein D2 polypeptide 16.5kDa	SMD2|SNRPD1|Sm-D2	2	0	0.780711	-0.357139	0.342206	0.465712
STRBP	55342	spermatid perinuclear RNA binding protein	HEL162|ILF3L|SPNR|p74	2	0	0.780711	-0.357139	0.342206	0.465712
TPI1	7167	triosephosphate isomerase 1	HEL-S-49|TIM|TPI|TPID	2	0	0.780711	-0.357139	0.342206	0.465712
ZC3H11A	9877	zinc finger CCCH-type containing 11A	ZC3HDC11A	2	0	0.780711	-0.357139	0.342206	0.465712
ZFR	51663	zinc finger RNA binding protein	SPG71|ZFR1	2	0	0.780711	-0.357139	0.342206	0.465712
PHB	5245	prohibitin	HEL-215|HEL-S-54e|PHB1	37	68	1.70421	0.769104	0.342278	0.465621
HNRNPA1L2	144983	heterogeneous nuclear ribonucleoprotein A1-like 2	-	15	8	0.710556	-0.49298	0.345063	0.462102
MYH3	4621	myosin, heavy chain 3, skeletal muscle, embryonic	HEMHC|MYHC-EMB|MYHSE1|SMHCE	0	4	1.98442	0.988714	0.348755	0.45748
CCT8	10694	chaperonin containing TCP1, subunit 8 (theta)	C21orf112|Cctq|D21S246|PRED71	1	8	2.11039	1.07751	0.350203	0.45568
KRT34	3885	keratin 34, type I	HA4|Ha-4|KRTHA4|hHa4	0	5	2.16555	1.11473	0.3506	0.455188
LOC100653049	100653049	keratin, type I cuticular Ha4-like	-	0	5	2.16555	1.11473	0.3506	0.455188
ATP5F1	515	ATP synthase, H+ transporting, mitochondrial Fo complex, subunit B1	PIG47	3	7	1.55861	0.640255	0.352027	0.453424
SEC22B	9554	SEC22 vesicle trafficking protein homolog B (S. cerevisiae) (gene/pseudogene)	ERS-24|SEC22L1	3	7	1.55861	0.640255	0.352027	0.453424
DAP3	7818	death associated protein 3	DAP-3|MRP-S29|MRPS29|bMRP-10	23	16	0.845423	-0.242254	0.354121	0.450848
TMEM109	79073	transmembrane protein 109	-	3	2	0.843717	-0.24517	0.354216	0.450732
KRT12	3859	keratin 12, type I	K12	46	37	0.814707	-0.295648	0.361295	0.442138
BCKDHA	593	branched chain keto acid dehydrogenase E1, alpha polypeptide	BCKDE1A|MSU|MSUD1|OVD1A	1	0	0.813821	-0.297216	0.363344	0.439683
C1orf68	100129271	chromosome 1 open reading frame 68	LEP7|XP32	1	0	0.813821	-0.297216	0.363344	0.439683
CCDC87	55231	coiled-coil domain containing 87	-	1	0	0.813821	-0.297216	0.363344	0.439683
COX5B	1329	cytochrome c oxidase subunit Vb	COXVB	1	0	0.813821	-0.297216	0.363344	0.439683
CST6	1474	cystatin E/M	-	1	0	0.813821	-0.297216	0.363344	0.439683
CTNNB1	1499	catenin (cadherin-associated protein), beta 1, 88kDa	CTNNB|MRD19|armadillo	1	0	0.813821	-0.297216	0.363344	0.439683
DDB1	1642	damage-specific DNA binding protein 1, 127kDa	DDBA|UV-DDB1|XAP1|XPCE|XPE|XPE-BF	1	0	0.813821	-0.297216	0.363344	0.439683
DNAJA1	3301	DnaJ (Hsp40) homolog, subfamily A, member 1	DJ-2|DjA1|HDJ2|HSDJ|HSJ2|HSPF4|NEDD7|hDJ-2	1	0	0.813821	-0.297216	0.363344	0.439683
EIF2AK2	5610	eukaryotic translation initiation factor 2-alpha kinase 2	EIF2AK1|PKR|PPP1R83|PRKR	1	0	0.813821	-0.297216	0.363344	0.439683
EIF6	3692	eukaryotic translation initiation factor 6	CAB|EIF3A|ITGB4BP|b(2)gcn|eIF-6|p27(BBP)|p27BBP	1	0	0.813821	-0.297216	0.363344	0.439683
EMC1	23065	ER membrane protein complex subunit 1	KIAA0090	1	0	0.813821	-0.297216	0.363344	0.439683
FKBP3	2287	FK506 binding protein 3, 25kDa	FKBP-25|FKBP-3|FKBP25|PPIase	1	0	0.813821	-0.297216	0.363344	0.439683
FRYL	285527	FRY-like	KIAA0826	1	0	0.813821	-0.297216	0.363344	0.439683
GOLIM4	27333	golgi integral membrane protein 4	GIMPC|GOLPH4|GPP130|P138	1	0	0.813821	-0.297216	0.363344	0.439683
GSTK1	373156	glutathione S-transferase kappa 1	GST|GST 13-13|GST13|GST13-13|GSTK1-1|hGSTK1	1	0	0.813821	-0.297216	0.363344	0.439683
GUF1	60558	GUF1 GTPase homolog (S. cerevisiae)	EF-4	1	0	0.813821	-0.297216	0.363344	0.439683
MARS	4141	methionyl-tRNA synthetase	METRS|MRS|MTRNS|SPG70	1	0	0.813821	-0.297216	0.363344	0.439683
MGME1	92667	mitochondrial genome maintenance exonuclease 1	C20orf72|DDK1|MTDPS11|bA504H3.4	1	0	0.813821	-0.297216	0.363344	0.439683
MRM1	79922	mitochondrial rRNA methyltransferase 1 homolog (S. cerevisiae)	-	1	0	0.813821	-0.297216	0.363344	0.439683
MRPL15	29088	mitochondrial ribosomal protein L15	HSPC145|L15mt|MRP-L15|MRP-L7|RPML7	1	0	0.813821	-0.297216	0.363344	0.439683
MRPL21	219927	mitochondrial ribosomal protein L21	L21mt|MRP-L21	1	0	0.813821	-0.297216	0.363344	0.439683
MRPL30	51263	mitochondrial ribosomal protein L30	L28MT|L30MT|MRP-L28|MRP-L30|MRPL28|MRPL28M|RPML28	1	0	0.813821	-0.297216	0.363344	0.439683
MRPL55	128308	mitochondrial ribosomal protein L55	AAVG5835|L55nt|MRP-L55|PRO19675	1	0	0.813821	-0.297216	0.363344	0.439683
MRPS12	6183	mitochondrial ribosomal protein S12	MPR-S12|MT-RPS12|RPMS12|RPS12|RPSM12	1	0	0.813821	-0.297216	0.363344	0.439683
NCLN	56926	nicalin	NET59	1	0	0.813821	-0.297216	0.363344	0.439683
NUP155	9631	nucleoporin 155kDa	ATFB15|N155	1	0	0.813821	-0.297216	0.363344	0.439683
PABPC1L2A	340529	poly(A) binding protein, cytoplasmic 1-like 2A	RBM32A	1	0	0.813821	-0.297216	0.363344	0.439683
PABPC1L2B	645974	poly(A) binding protein, cytoplasmic 1-like 2B	RBM32B	1	0	0.813821	-0.297216	0.363344	0.439683
PICALM	8301	phosphatidylinositol binding clathrin assembly protein	CALM|CLTH|LAP	1	0	0.813821	-0.297216	0.363344	0.439683
PPA2	27068	pyrophosphatase (inorganic) 2	HSPC124|SID6-306	1	0	0.813821	-0.297216	0.363344	0.439683
PPM1A	5494	protein phosphatase, Mg2+/Mn2+ dependent, 1A	PP2C-ALPHA|PP2CA|PP2Calpha	1	0	0.813821	-0.297216	0.363344	0.439683
PPM1B	5495	protein phosphatase, Mg2+/Mn2+ dependent, 1B	PP2C-beta|PP2C-beta-X|PP2CB|PP2CBETA|PPC2BETAX	1	0	0.813821	-0.297216	0.363344	0.439683
PSMA6	5687	proteasome (prosome, macropain) subunit, alpha type, 6	IOTA|PROS27|p27K	1	0	0.813821	-0.297216	0.363344	0.439683
PSMB3	5691	proteasome (prosome, macropain) subunit, beta type, 3	HC10-II	1	0	0.813821	-0.297216	0.363344	0.439683
RPL38	6169	ribosomal protein L38	L38	1	0	0.813821	-0.297216	0.363344	0.439683
SDHAF1	644096	succinate dehydrogenase complex assembly factor 1	LYRM8	1	0	0.813821	-0.297216	0.363344	0.439683
SNAP91	9892	synaptosomal-associated protein, 91kDa	AP180|CALM	1	0	0.813821	-0.297216	0.363344	0.439683
TBL2	26608	transducin (beta)-like 2	WBSCR13|WS-betaTRP	1	0	0.813821	-0.297216	0.363344	0.439683
TMEM214	54867	transmembrane protein 214	-	1	0	0.813821	-0.297216	0.363344	0.439683
TRA2A	29896	transformer 2 alpha homolog (Drosophila)	AWMS1|HSU53209	1	0	0.813821	-0.297216	0.363344	0.439683
CHCHD3	54927	coiled-coil-helix-coiled-coil-helix domain containing 3	MINOS3|PPP1R22	2	4	1.34144	0.423788	0.365834	0.436716
VARS	7407	valyl-tRNA synthetase	G7A|VARS1|VARS2	2	4	1.34144	0.423788	0.365834	0.436716
CAPZB	832	capping protein (actin filament) muscle Z-line, beta	CAPB|CAPPB|CAPZ	0	2	1.55769	0.63941	0.369402	0.432501
CCDC8	83987	coiled-coil domain containing 8	3M3|PPP1R20|p90	0	2	1.55769	0.63941	0.369402	0.432501
DDX28	55794	DEAD (Asp-Glu-Ala-Asp) box polypeptide 28	MDDX28	0	2	1.55769	0.63941	0.369402	0.432501
EIF3M	10480	eukaryotic translation initiation factor 3, subunit M	B5|GA17|PCID1|TANGO7|hfl-B5	0	2	1.55769	0.63941	0.369402	0.432501
EIF4G1	1981	eukaryotic translation initiation factor 4 gamma, 1	EIF-4G1|EIF4F|EIF4G|EIF4GI|P220|PARK18	0	2	1.55769	0.63941	0.369402	0.432501
ESYT1	23344	extended synaptotagmin-like protein 1	FAM62A|MBC2	0	2	1.55769	0.63941	0.369402	0.432501
GNS	2799	glucosamine (N-acetyl)-6-sulfatase	G6S	0	2	1.55769	0.63941	0.369402	0.432501
MRPL52	122704	mitochondrial ribosomal protein L52	-	0	2	1.55769	0.63941	0.369402	0.432501
NDUFA10	4705	NADH dehydrogenase (ubiquinone) 1 alpha subcomplex, 10, 42kDa	CI-42KD|CI-42k	0	2	1.55769	0.63941	0.369402	0.432501
RAB12	201475	RAB12, member RAS oncogene family	-	0	2	1.55769	0.63941	0.369402	0.432501
RAB14	51552	RAB14, member RAS oncogene family	FBP|RAB-14	0	2	1.55769	0.63941	0.369402	0.432501
RAB15	376267	RAB15, member RAS oncogene family	-	0	2	1.55769	0.63941	0.369402	0.432501
RAB1A	5861	RAB1A, member RAS oncogene family	RAB1|YPT1	0	2	1.55769	0.63941	0.369402	0.432501
RAB1B	81876	RAB1B, member RAS oncogene family	-	0	2	1.55769	0.63941	0.369402	0.432501
RAB30	27314	RAB30, member RAS oncogene family	-	0	2	1.55769	0.63941	0.369402	0.432501
RAB33B	83452	RAB33B, member RAS oncogene family	SMC2	0	2	1.55769	0.63941	0.369402	0.432501
RAB35	11021	RAB35, member RAS oncogene family	H-ray|RAB1C|RAY	0	2	1.55769	0.63941	0.369402	0.432501
RAB37	326624	RAB37, member RAS oncogene family	-	0	2	1.55769	0.63941	0.369402	0.432501
RAB39A	54734	RAB39A, member RAS oncogene family	RAB39	0	2	1.55769	0.63941	0.369402	0.432501
RAB39B	116442	RAB39B, member RAS oncogene family	MRX72|WSMN	0	2	1.55769	0.63941	0.369402	0.432501
RAB3A	5864	RAB3A, member RAS oncogene family	-	0	2	1.55769	0.63941	0.369402	0.432501
RAB3B	5865	RAB3B, member RAS oncogene family	-	0	2	1.55769	0.63941	0.369402	0.432501
RAB3C	115827	RAB3C, member RAS oncogene family	-	0	2	1.55769	0.63941	0.369402	0.432501
RAB3D	9545	RAB3D, member RAS oncogene family	D2-2|GOV|RAB16|RAD3D	0	2	1.55769	0.63941	0.369402	0.432501
RAB43	339122	RAB43, member RAS oncogene family	RAB11B|RAB41	0	2	1.55769	0.63941	0.369402	0.432501
RAB4A	5867	RAB4A, member RAS oncogene family	HRES-1|HRES-1/RAB4|HRES1|RAB4	0	2	1.55769	0.63941	0.369402	0.432501
RAB4B	53916	RAB4B, member RAS oncogene family	-	0	2	1.55769	0.63941	0.369402	0.432501
RAB6A	5870	RAB6A, member RAS oncogene family	RAB6	0	2	1.55769	0.63941	0.369402	0.432501
RAB6B	51560	RAB6B, member RAS oncogene family	-	0	2	1.55769	0.63941	0.369402	0.432501
RAB8A	4218	RAB8A, member RAS oncogene family	MEL|RAB8	0	2	1.55769	0.63941	0.369402	0.432501
RAB8B	51762	RAB8B, member RAS oncogene family	-	0	2	1.55769	0.63941	0.369402	0.432501
RFC4	5984	replication factor C (activator 1) 4, 37kDa	A1|RFC37	0	2	1.55769	0.63941	0.369402	0.432501
ROCK2	9475	Rho-associated, coiled-coil containing protein kinase 2	ROCK-II	0	2	1.55769	0.63941	0.369402	0.432501
RRBP1	6238	ribosome binding protein 1	ES/130|ES130|RRp|hES	0	2	1.55769	0.63941	0.369402	0.432501
SAMM50	25813	SAMM50 sorting and assembly machinery component	CGI-51|OMP85|SAM50|TOB55|TRG-3|YNL026W	0	2	1.55769	0.63941	0.369402	0.432501
TCP1	6950	t-complex 1	CCT-alpha|CCT1|CCTa|D6S230E|TCP-1-alpha	0	2	1.55769	0.63941	0.369402	0.432501
TRUB2	26995	TruB pseudouridine (psi) synthase family member 2	CLONE24922	0	2	1.55769	0.63941	0.369402	0.432501
VAT1	10493	vesicle amine transport 1	VATI	0	2	1.55769	0.63941	0.369402	0.432501
MARCKS	4082	myristoylated alanine-rich protein kinase C substrate	80K-L|MACS|PKCSL|PRKCSL	4	8	1.40955	0.495239	0.369696	0.432155
ACAD9	28976	acyl-CoA dehydrogenase family, member 9	NPD002	1	6	1.78604	0.836767	0.369789	0.432046
KRT6A	3853	keratin 6A, type II	CK6A|CK6C|CK6D|K6A|K6C|K6D|KRT6C|KRT6D|PC3	518	443	0.84867	-0.236724	0.376352	0.424405
C1QBP	708	complement component 1, q subcomponent binding protein	GC1QBP|HABP1|SF2p32|gC1Q-R|gC1qR|p32	22	19	0.888372	-0.170764	0.377169	0.423464
APMAP	57136	adipocyte plasma membrane associated protein	BSCv|C20orf3	3	1	0.716905	-0.480147	0.380528	0.419613
SRSF3	6428	serine/arginine-rich splicing factor 3	SFRS3|SRp20	6	3	0.79646	-0.328327	0.383439	0.416304
CSDE1	7812	cold shock domain containing E1, RNA-binding	D1S155E|UNR	3	1	0.804415	-0.313989	0.385409	0.414078
FASTKD2	22868	FAST kinase domains 2	KIAA0971	3	1	0.804415	-0.313989	0.385409	0.414078
HK1	3098	hexokinase 1	HK1-ta|HK1-tb|HK1-tc|HKD|HKI|HMSNR|HXK1	3	1	0.804415	-0.313989	0.385409	0.414078
MRPS34	65993	mitochondrial ribosomal protein S34	MRP-S12|MRP-S34|MRPS12	3	1	0.804415	-0.313989	0.385409	0.414078
PPP1CA	5499	protein phosphatase 1, catalytic subunit, alpha isozyme	PP-1A|PP1A|PP1alpha|PPP1A	3	1	0.804415	-0.313989	0.385409	0.414078
PPP1CB	5500	protein phosphatase 1, catalytic subunit, beta isozyme	HEL-S-80p|PP-1B|PP1B|PP1beta|PPP1CD	3	1	0.804415	-0.313989	0.385409	0.414078
DLAT	1737	dihydrolipoamide S-acetyltransferase	DLTA|PDC-E2|PDCE2	8	6	0.769861	-0.377331	0.386878	0.412427
ICT1	3396	immature colon carcinoma transcript 1	DS-1|DS1|MRP-L58	6	4	0.84543	-0.242244	0.389211	0.409815
PRMT5	10419	protein arginine methyltransferase 5	HRMT1L5|IBP72|JBP1|SKB1|SKB1Hs	24	18	0.716371	-0.481222	0.393218	0.405367
ILF3	3609	interleukin enhancer binding factor 3, 90kDa	CBTF|DRBF|DRBP76|MMP4|MPHOSPH4|MPP4|NF-AT-90|NF110|NF110b|NF90|NF90a|NF90b|NFAR|NFAR-1|NFAR2|TCP110|TCP80	15	6	0.657205	-0.605584	0.393539	0.405012
KRT83	3889	keratin 83, type II	HB3|Hb-3|KRTHB3	2	12	2.27332	1.1848	0.394234	0.404246
PTCD1	26024	pentatricopeptide repeat domain 1	-	10	5	0.585613	-0.77198	0.394708	0.403724
ACADVL	37	acyl-CoA dehydrogenase, very long chain	ACAD6|LCACD|VLCAD	15	27	1.58691	0.666217	0.395122	0.403269
KRT28	162605	keratin 28, type I	KRT25D	168	144	0.837518	-0.255808	0.398118	0.399988
KRT6C	286887	keratin 6C, type II	K6E|KRT6E|PPKNEFD	475	406	0.851438	-0.232026	0.400562	0.39733
GNB2L1	10399	guanine nucleotide binding protein (G protein), beta polypeptide 2-like 1	Gnb2-rs1|H12.3|HLC-7|PIG21|RACK1	3	5	1.4809	0.566473	0.402772	0.394941
MYH11	4629	myosin, heavy chain 11, smooth muscle	AAT4|FAA4|SMHC|SMMHC	3	5	1.4809	0.566473	0.402772	0.394941
RBBP4	5928	retinoblastoma binding protein 4	NURF55|RBAP48|lin-53	5	3	0.769277	-0.378425	0.40284	0.394868
GFAP	2670	glial fibrillary acidic protein	-	30	41	1.28658	0.363537	0.403002	0.394693
EIF4A3	9775	eukaryotic translation initiation factor 4A3	DDX48|MUK34|NMP265|NUK34|RCPS|eIF4AIII	4	2	0.68163	-0.552939	0.40391	0.393716
KRT19	3880	keratin 19, type I	CK19|K19|K1CS	131	111	0.824086	-0.279134	0.404984	0.392562
GSTM2	2946	glutathione S-transferase mu 2 (muscle)	GST4|GSTM|GSTM2-2|GTHMUS	3	1	0.743443	-0.427706	0.405488	0.392022
GSTM5	2949	glutathione S-transferase mu 5	GSTM5-5|GTM5	3	1	0.743443	-0.427706	0.405488	0.392022
G6PD	2539	glucose-6-phosphate dehydrogenase	G6PD1	3	1	0.883939	-0.177981	0.410889	0.386275
KRT86	3892	keratin 86, type II	HB6|Hb1|KRTHB1|KRTHB6|MNX|hHb6	2	10	2.00755	1.00543	0.414122	0.382871
PRDX2	7001	peroxiredoxin 2	HEL-S-2a|NKEF-B|NKEFB|PRP|PRX2|PRXII|PTX1|TDPX1|TPX1|TSA	18	14	0.898478	-0.154445	0.414899	0.382057
PDHB	5162	pyruvate dehydrogenase (lipoamide) beta	PDHBD|PDHE1-B|PHE1B	15	22	1.27268	0.347866	0.414954	0.382001
ALDH9A1	223	aldehyde dehydrogenase 9 family, member A1	ALDH4|ALDH7|ALDH9|E3|TMABADH	1	2	1.22849	0.29689	0.41671	0.380166
GDI2	2665	GDP dissociation inhibitor 2	HEL-S-46e|RABGDIB	1	2	1.22849	0.29689	0.41671	0.380166
IGF2BP2	10644	insulin-like growth factor 2 mRNA binding protein 2	IMP-2|IMP2|VICKZ2	1	2	1.22849	0.29689	0.41671	0.380166
LOC102724828	102724828	39S ribosomal protein L23, mitochondrial-like	-	1	2	1.22849	0.29689	0.41671	0.380166
MRPL23	6150	mitochondrial ribosomal protein L23	L23MRP|RPL23|RPL23L	1	2	1.22849	0.29689	0.41671	0.380166
MRPL32	64983	mitochondrial ribosomal protein L32	HSPC283|L32mt|MRP-L32|bMRP-59b	1	2	1.22849	0.29689	0.41671	0.380166
MRPL40	64976	mitochondrial ribosomal protein L40	MRP-L22|MRPL22|NLVCF|URIM	1	2	1.22849	0.29689	0.41671	0.380166
MYH9	4627	myosin, heavy chain 9, non-muscle	BDPLT6|DFNA17|EPSTS|FTNS|MHA|NMHC-II-A|NMMHC-IIA|NMMHCA	1	2	1.22849	0.29689	0.41671	0.380166
MYL12A	10627	myosin, light chain 12A, regulatory, non-sarcomeric	HEL-S-24|MLC-2B|MLCB|MRCL3|MRLC3|MYL2B	1	2	1.22849	0.29689	0.41671	0.380166
MYL12B	103910	myosin, light chain 12B, regulatory	MLC-B|MRLC2	1	2	1.22849	0.29689	0.41671	0.380166
SPTBN2	6712	spectrin, beta, non-erythrocytic 2	GTRAP41|SCA5|SCAR14	1	2	1.22849	0.29689	0.41671	0.380166
LCN1	3933	lipocalin 1	PMFA|TLC|TP|VEGP	0	2	1.47957	0.565179	0.417095	0.379765
LMNB1	4001	lamin B1	ADLD|LMN|LMN2|LMNB	0	2	1.47957	0.565179	0.417095	0.379765
PCK2	5106	phosphoenolpyruvate carboxykinase 2 (mitochondrial)	PEPCK|PEPCK-M|PEPCK2	0	2	1.47957	0.565179	0.417095	0.379765
RBBP7	5931	retinoblastoma binding protein 7	RbAp46	0	2	1.47957	0.565179	0.417095	0.379765
S100A14	57402	S100 calcium binding protein A14	BCMP84|S100A15	0	2	1.47957	0.565179	0.417095	0.379765
TKT	7086	transketolase	HEL107|TK|TKT1	0	2	1.47957	0.565179	0.417095	0.379765
ECH1	1891	enoyl CoA hydratase 1, peroxisomal	HPXEL	12	7	0.744934	-0.424816	0.417409	0.379438
ATAD1	84896	ATPase family, AAA domain containing 1	AFDC1|FNP001|THORASE	1	4	1.4617	0.547644	0.417595	0.379245
ALB	213	albumin	ANALBA|FDAH|PRO0883|PRO0903|PRO1341	251	210	0.803919	-0.314879	0.418999	0.377787
ATP4A	495	ATPase, H+/K+ exchanging, alpha polypeptide	ATP6A	22	18	0.822639	-0.281669	0.421281	0.375428
A2M	2	alpha-2-macroglobulin	A2MD|CPAMD5|FWP007|S863-7	55	44	0.798652	-0.324361	0.421297	0.375411
ATP1A1	476	ATPase, Na+/K+ transporting, alpha 1 polypeptide	-	33	43	1.2368	0.306608	0.422063	0.374623
VCP	7415	valosin containing protein	ALS14|HEL-220|HEL-S-70|IBMPFD|IBMPFD1|TERA|p97	22	30	1.50999	0.594539	0.425021	0.371589
SLC25A6	293	solute carrier family 25 (mitochondrial carrier; adenine nucleotide translocator), member 6	2|3|AAC3|ANT|ANT 2|ANT 3|ANT3|ANT3Y	12	18	1.28435	0.361039	0.425844	0.370749
KRT14	3861	keratin 14, type I	CK14|EBS3|EBS4|K14|NFJ	531	461	0.860472	-0.2168	0.426274	0.370311
AARD	441376	alanine and arginine rich domain containing protein	C8orf85	1	0	0.834535	-0.260956	0.426323	0.370262
ACIN1	22985	apoptotic chromatin condensation inducer 1	ACINUS|ACN|fSAP152	1	0	0.834535	-0.260956	0.426323	0.370262
ACOT8	10005	acyl-CoA thioesterase 8	HNAACTE|PTE-1|PTE-2|PTE1|PTE2|hACTE-III|hTE	1	0	0.834535	-0.260956	0.426323	0.370262
ACOT9	23597	acyl-CoA thioesterase 9	ACATE2|CGI-16|MT-ACT48|MTACT48	1	0	0.834535	-0.260956	0.426323	0.370262
ACSS1	84532	acyl-CoA synthetase short-chain family member 1	ACAS2L|ACECS1|AceCS2L	1	0	0.834535	-0.260956	0.426323	0.370262
ALDH1A2	8854	aldehyde dehydrogenase 1 family, member A2	RALDH(II)|RALDH2|RALDH2-T	1	0	0.834535	-0.260956	0.426323	0.370262
ALDH6A1	4329	aldehyde dehydrogenase 6 family, member A1	MMSADHA|MMSDH	1	0	0.834535	-0.260956	0.426323	0.370262
AP3S1	1176	adaptor-related protein complex 3, sigma 1 subunit	CLAPS3|Sigma3A	1	0	0.834535	-0.260956	0.426323	0.370262
API5	8539	apoptosis inhibitor 5	AAC-11|AAC11	1	0	0.834535	-0.260956	0.426323	0.370262
BASP1	10409	brain abundant, membrane attached signal protein 1	CAP-23|CAP23|NAP-22|NAP22	1	0	0.834535	-0.260956	0.426323	0.370262
BLNK	29760	B-cell linker	AGM4|BASH|BLNK-S|LY57|SLP-65|SLP65|bca	1	0	0.834535	-0.260956	0.426323	0.370262
C17orf85	55421	chromosome 17 open reading frame 85	ELG|HSA277841	1	0	0.834535	-0.260956	0.426323	0.370262
CARS2	79587	cysteinyl-tRNA synthetase 2, mitochondrial (putative)	-	1	0	0.834535	-0.260956	0.426323	0.370262
CHTOP	26097	chromatin target of PRMT1	C1orf77|FL-SRAG|FOP|SRAG|SRAG-3|SRAG-5|pp7704	1	0	0.834535	-0.260956	0.426323	0.370262
COA6	388753	cytochrome c oxidase assembly factor 6	C1orf31	1	0	0.834535	-0.260956	0.426323	0.370262
CPSF1	29894	cleavage and polyadenylation specific factor 1, 160kDa	CPSF160|HSU37012|P/cl.18	1	0	0.834535	-0.260956	0.426323	0.370262
CPSF6	11052	cleavage and polyadenylation specific factor 6, 68kDa	CFIM|CFIM68|HPBRII-4|HPBRII-7	1	0	0.834535	-0.260956	0.426323	0.370262
CTSZ	1522	cathepsin Z	CTSX	1	0	0.834535	-0.260956	0.426323	0.370262
DDX21	9188	DEAD (Asp-Glu-Ala-Asp) box helicase 21	GUA|GURDB|RH-II/GU|RH-II/GuA	1	0	0.834535	-0.260956	0.426323	0.370262
DENR	8562	density-regulated protein	DRP|DRP1|SMAP-3	1	0	0.834535	-0.260956	0.426323	0.370262
DNAH12	201625	dynein, axonemal, heavy chain 12	DHC3|DLP12|DNAH12L|DNAH7L|DNAHC12|DNAHC3|DNHD2|HDHC3|HL-19|HL19	1	0	0.834535	-0.260956	0.426323	0.370262
DNAJC10	54431	DnaJ (Hsp40) homolog, subfamily C, member 10	ERdj5|JPDI|MTHr|PDIA19	1	0	0.834535	-0.260956	0.426323	0.370262
ERLIN1	10613	ER lipid raft associated 1	C10orf69|Erlin-1|KE04|KEO4|SPFH1|SPG62	1	0	0.834535	-0.260956	0.426323	0.370262
EXOSC3	51010	exosome component 3	CGI-102|PCH1B|RRP40|Rrp40p|bA3J10.7|hRrp-40|p10	1	0	0.834535	-0.260956	0.426323	0.370262
EXOSC4	54512	exosome component 4	RRP41|RRP41A|Rrp41p|SKI6|Ski6p|hRrp41p|p12A	1	0	0.834535	-0.260956	0.426323	0.370262
FABP3	2170	fatty acid binding protein 3, muscle and heart	FABP11|H-FABP|M-FABP|MDGI|O-FABP	1	0	0.834535	-0.260956	0.426323	0.370262
FABP5	2171	fatty acid binding protein 5 (psoriasis-associated)	E-FABP|EFABP|KFABP|PA-FABP|PAFABP	1	0	0.834535	-0.260956	0.426323	0.370262
FREM2	341640	FRAS1 related extracellular matrix protein 2	-	1	0	0.834535	-0.260956	0.426323	0.370262
GP2	2813	glycoprotein 2 (zymogen granule membrane)	ZAP75	1	0	0.834535	-0.260956	0.426323	0.370262
GPI	2821	glucose-6-phosphate isomerase	AMF|GNPI|NLK|PGI|PHI|SA-36|SA36	1	0	0.834535	-0.260956	0.426323	0.370262
H2AFV	94239	H2A histone family, member V	H2A.Z-2|H2AV	1	0	0.834535	-0.260956	0.426323	0.370262
H2AFX	3014	H2A histone family, member X	H2A.X|H2A/X|H2AX	1	0	0.834535	-0.260956	0.426323	0.370262
H2AFZ	3015	H2A histone family, member Z	H2A.Z-1|H2A.z|H2A/z|H2AZ	1	0	0.834535	-0.260956	0.426323	0.370262
HIST1H2AA	221613	histone cluster 1, H2aa	H2AA|H2AFR|bA317E16.2	1	0	0.834535	-0.260956	0.426323	0.370262
HIST2H2AB	317772	histone cluster 2, H2ab	H2AB	1	0	0.834535	-0.260956	0.426323	0.370262
HMGB2	3148	high mobility group box 2	HMG2	1	0	0.834535	-0.260956	0.426323	0.370262
HMGB3	3149	high mobility group box 3	HMG-2a|HMG-4|HMG2A|HMG4	1	0	0.834535	-0.260956	0.426323	0.370262
HN1L	90861	hematological and neurological expressed 1-like	C16orf34|L11	1	0	0.834535	-0.260956	0.426323	0.370262
INA	9118	internexin neuronal intermediate filament protein, alpha	NEF5|NF-66|TXBP-1	1	0	0.834535	-0.260956	0.426323	0.370262
LAP3	51056	leucine aminopeptidase 3	HEL-S-106|LAP|LAPEP|PEPS	1	0	0.834535	-0.260956	0.426323	0.370262
LOC102724594	102724594	splicing factor U2AF 35 kDa subunit-like	-	1	0	0.834535	-0.260956	0.426323	0.370262
LSM2	57819	LSM2 homolog, U6 small nuclear RNA associated (S. cerevisiae)	C6orf28|G7B|YBL026W|snRNP	1	0	0.834535	-0.260956	0.426323	0.370262
LSM4	25804	LSM4 homolog, U6 small nuclear RNA associated (S. cerevisiae)	GRP|YER112W	1	0	0.834535	-0.260956	0.426323	0.370262
LZTS3	9762	leucine zipper, putative tumor suppressor family member 3	PROSAPIP1	1	0	0.834535	-0.260956	0.426323	0.370262
M1AP	130951	meiosis 1 associated protein	C2orf65|D6Mm5e|SPATA37	1	0	0.834535	-0.260956	0.426323	0.370262
METTL3	56339	methyltransferase like 3	IME4|M6A|MT-A70|Spo8	1	0	0.834535	-0.260956	0.426323	0.370262
MICAL2	9645	microtubule associated monooxygenase, calponin and LIM domain containing 2	MICAL-2|MICAL2PV1|MICAL2PV2	1	0	0.834535	-0.260956	0.426323	0.370262
MLEC	9761	malectin	KIAA0152	1	0	0.834535	-0.260956	0.426323	0.370262
MYEF2	50804	myelin expression factor 2	HsT18564|MEF-2|MST156|MSTP156|myEF-2	1	0	0.834535	-0.260956	0.426323	0.370262
NEFM	4741	neurofilament, medium polypeptide	NEF3|NF-M|NFM	1	0	0.834535	-0.260956	0.426323	0.370262
NME1	4830	NME/NM23 nucleoside diphosphate kinase 1	AWD|GAAD|NB|NBS|NDKA|NDPK-A|NDPKA|NM23|NM23-H1	1	0	0.834535	-0.260956	0.426323	0.370262
NME1-NME2	654364	NME1-NME2 readthrough	NM23-LV|NMELV	1	0	0.834535	-0.260956	0.426323	0.370262
NME2	4831	NME/NM23 nucleoside diphosphate kinase 2	NDKB|NDPK-B|NDPKB|NM23-H2|NM23B|PUF	1	0	0.834535	-0.260956	0.426323	0.370262
NUP210	23225	nucleoporin 210kDa	GP210|POM210	1	0	0.834535	-0.260956	0.426323	0.370262
NUP98	4928	nucleoporin 98kDa	ADIR2|NUP196|NUP96	1	0	0.834535	-0.260956	0.426323	0.370262
OPA1	4976	optic atrophy 1 (autosomal dominant)	MGM1|NPG|NTG|largeG	1	0	0.834535	-0.260956	0.426323	0.370262
OR1N1	138883	olfactory receptor, family 1, subfamily N, member 1	OR1-26|OR1N3|OR9-22	1	0	0.834535	-0.260956	0.426323	0.370262
PEBP1	5037	phosphatidylethanolamine binding protein 1	HCNP|HCNPpp|HEL-210|HEL-S-34|PBP|PEBP|PEBP-1|RKIP	1	0	0.834535	-0.260956	0.426323	0.370262
PPIAL4B	653505	peptidylprolyl isomerase A (cyclophilin A)-like 4B	COAS-2|COAS2|PPIAL4|PPIAL4A	1	0	0.834535	-0.260956	0.426323	0.370262
PPIAL4C	653598	peptidylprolyl isomerase A (cyclophilin A)-like 4C	COAS-2	1	0	0.834535	-0.260956	0.426323	0.370262
PPIAL4D	645142	peptidylprolyl isomerase A (cyclophilin A)-like 4D	-	1	0	0.834535	-0.260956	0.426323	0.370262
PPIAL4E	730262	peptidylprolyl isomerase A (cyclophilin A)-like 4E	COAS2	1	0	0.834535	-0.260956	0.426323	0.370262
PPIAL4F	728945	peptidylprolyl isomerase A (cyclophilin A)-like 4F	-	1	0	0.834535	-0.260956	0.426323	0.370262
PPIAL4G	644591	peptidylprolyl isomerase A (cyclophilin A)-like 4G	COAS-2	1	0	0.834535	-0.260956	0.426323	0.370262
PRPH	5630	peripherin	NEF4|PRPH1	1	0	0.834535	-0.260956	0.426323	0.370262
PRPS1	5631	phosphoribosyl pyrophosphate synthetase 1	ARTS|CMTX5|DFN2|DFNX1|PPRibP|PRS-I|PRSI	1	0	0.834535	-0.260956	0.426323	0.370262
PRPS1L1	221823	phosphoribosyl pyrophosphate synthetase 1-like 1	PRPS1|PRPS3|PRPSL|PRS-III	1	0	0.834535	-0.260956	0.426323	0.370262
PRPS2	5634	phosphoribosyl pyrophosphate synthetase 2	PRSII	1	0	0.834535	-0.260956	0.426323	0.370262
PSMA7	5688	proteasome (prosome, macropain) subunit, alpha type, 7	C6|HSPC|RC6-1|XAPC7	1	0	0.834535	-0.260956	0.426323	0.370262
RBM4B	83759	RNA binding motif protein 4B	RBM30|RBM4L|ZCCHC15|ZCCHC21B|ZCRB3B	1	0	0.834535	-0.260956	0.426323	0.370262
RCBTB2	1102	regulator of chromosome condensation (RCC1) and BTB (POZ) domain containing protein 2	CHC1L|RLG	1	0	0.834535	-0.260956	0.426323	0.370262
RPL13	6137	ribosomal protein L13	BBC1|D16S444E|D16S44E|L13	1	0	0.834535	-0.260956	0.426323	0.370262
RPL3	6122	ribosomal protein L3	ASC-1|L3|TARBP-B	1	0	0.834535	-0.260956	0.426323	0.370262
RPL35	11224	ribosomal protein L35	L35	1	0	0.834535	-0.260956	0.426323	0.370262
SART1	9092	squamous cell carcinoma antigen recognized by T cells	Ara1|HOMS1|SART1259|SNRNP110|Snu66	1	0	0.834535	-0.260956	0.426323	0.370262
SMU1	55234	smu-1 suppressor of mec-8 and unc-52 homolog (C. elegans)	BWD|SMU-1|fSAP57	1	0	0.834535	-0.260956	0.426323	0.370262
SNRPE	6635	small nuclear ribonucleoprotein polypeptide E	B-raf|HYPT11|SME|Sm-E	1	0	0.834535	-0.260956	0.426323	0.370262
SNW1	22938	SNW domain containing 1	Bx42|NCOA-62|PRPF45|Prp45|SKIIP|SKIP	1	0	0.834535	-0.260956	0.426323	0.370262
SSB	6741	Sjogren syndrome antigen B (autoantigen La)	LARP3|La|La/SSB	1	0	0.834535	-0.260956	0.426323	0.370262
SUMO2	6613	small ubiquitin-like modifier 2	HSMT3|SMT3B|SMT3H2|SUMO3|Smt3A	1	0	0.834535	-0.260956	0.426323	0.370262
SUMO3	6612	small ubiquitin-like modifier 3	SMT3A|SMT3H1|SUMO-3|Smt3B	1	0	0.834535	-0.260956	0.426323	0.370262
SUMO4	387082	small ubiquitin-like modifier 4	IDDM5|SMT3H4|SUMO-4|dJ281H8.4	1	0	0.834535	-0.260956	0.426323	0.370262
TADA2B	93624	transcriptional adaptor 2B	ADA2(beta)|ADA2B	1	0	0.834535	-0.260956	0.426323	0.370262
U2AF1	7307	U2 small nuclear RNA auxiliary factor 1	FP793|RN|RNU2AF1|U2AF35|U2AFBP	1	0	0.834535	-0.260956	0.426323	0.370262
U2AF2	11338	U2 small nuclear RNA auxiliary factor 2	U2AF65	1	0	0.834535	-0.260956	0.426323	0.370262
UACA	55075	uveal autoantigen with coiled-coil domains and ankyrin repeats	NUCLING	1	0	0.834535	-0.260956	0.426323	0.370262
WTAP	9589	Wilms tumor 1 associated protein	Mum2	1	0	0.834535	-0.260956	0.426323	0.370262
XRCC5	7520	X-ray repair complementing defective repair in Chinese hamster cells 5 (double-strand-break rejoining)	KARP-1|KARP1|KU80|KUB2|Ku86|NFIV	1	0	0.834535	-0.260956	0.426323	0.370262
ZC3H14	79882	zinc finger CCCH-type containing 14	MSUT-2|NY-REN-37|SUT2|UKp68	1	0	0.834535	-0.260956	0.426323	0.370262
DHX9	1660	DEAH (Asp-Glu-Ala-His) box helicase 9	DDX9|LKP|NDH2|NDHII|RHA	14	5	1.05658	0.0794069	0.427621	0.368941
KRT81	3887	keratin 81, type II	HB1|Hb-1|KRTHB1|MLN137|ghHkb1|hHAKB2-1	2	9	1.87466	0.90663	0.42777	0.36879
MRPL43	84545	mitochondrial ribosomal protein L43	bMRP36a	6	3	0.719334	-0.475266	0.431881	0.364636
VDAC2	7417	voltage-dependent anion channel 2	POR	9	19	1.67175	0.741357	0.432454	0.36406
ACTN1	87	actinin, alpha 1	BDPLT15	3	5	1.6482	0.720893	0.433488	0.363023
HIST1H4A	8359	histone cluster 1, H4a	H4FA	0	2	1.45057	0.536621	0.433676	0.362834
HIST1H4B	8366	histone cluster 1, H4b	H4/I|H4FI	0	2	1.45057	0.536621	0.433676	0.362834
HIST1H4C	8364	histone cluster 1, H4c	H4/g|H4FG|dJ221C16.1	0	2	1.45057	0.536621	0.433676	0.362834
HIST1H4D	8360	histone cluster 1, H4d	H4/b|H4FB|dJ221C16.9	0	2	1.45057	0.536621	0.433676	0.362834
HIST1H4E	8367	histone cluster 1, H4e	H4/j|H4FJ	0	2	1.45057	0.536621	0.433676	0.362834
HIST1H4F	8361	histone cluster 1, H4f	H4|H4/c|H4FC	0	2	1.45057	0.536621	0.433676	0.362834
HIST1H4H	8365	histone cluster 1, H4h	H4/h|H4FH	0	2	1.45057	0.536621	0.433676	0.362834
HIST1H4I	8294	histone cluster 1, H4i	H4/m|H4FM|H4M	0	2	1.45057	0.536621	0.433676	0.362834
HIST1H4J	8363	histone cluster 1, H4j	H4/e|H4F2iv|H4FE|dJ160A22.2	0	2	1.45057	0.536621	0.433676	0.362834
HIST1H4K	8362	histone cluster 1, H4k	H4/d|H4F2iii|H4FD|dJ160A22.1	0	2	1.45057	0.536621	0.433676	0.362834
HIST1H4L	8368	histone cluster 1, H4l	H4.k|H4/k|H4FK	0	2	1.45057	0.536621	0.433676	0.362834
HIST2H4A	8370	histone cluster 2, H4a	FO108|H4|H4/n|H4F2|H4FN|HIST2H4	0	2	1.45057	0.536621	0.433676	0.362834
HIST2H4B	554313	histone cluster 2, H4b	H4/o	0	2	1.45057	0.536621	0.433676	0.362834
HIST4H4	121504	histone cluster 4, H4	H4/p	0	2	1.45057	0.536621	0.433676	0.362834
KRT40	125115	keratin 40, type I	CK-40|K40|KA36	0	2	1.45057	0.536621	0.433676	0.362834
RB1CC1	9821	RB1-inducible coiled-coil 1	ATG17|CC1|FIP200|PPP1R131	0	2	1.45057	0.536621	0.433676	0.362834
HSPA8	3312	heat shock 70kDa protein 8	HEL-33|HEL-S-72p|HSC54|HSC70|HSC71|HSP71|HSP73|HSPA10|LAP-1|LAP1|NIP71	14	20	1.31418	0.394167	0.435706	0.360806
IKBIP	121457	IKBKB interacting protein	IKIP	4	3	0.816346	-0.292748	0.436442	0.360074
KRT33A	3883	keratin 33A, type I	HA3I|Ha-3I|K33A|KRTHA3A|Krt1-3|hHa3-I	2	11	1.80185	0.849479	0.437246	0.359275
HNRNPH1	3187	heterogeneous nuclear ribonucleoprotein H1 (H)	HNRPH|HNRPH1|hnRNPH	21	11	0.466387	-1.1004	0.437612	0.358911
PYCR1	5831	pyrroline-5-carboxylate reductase 1	ARCL2B|ARCL3B|P5C|P5CR|PIG45|PP222|PRO3|PYCR	9	5	0.80206	-0.318217	0.440582	0.355974
AK2	204	adenylate kinase 2	ADK2|AK 2	3	7	1.4289	0.514905	0.44404	0.352578
EWSR1	2130	EWS RNA-binding protein 1	EWS|bK984G1.4	4	2	0.82733	-0.273465	0.444942	0.351696
KRT85	3891	keratin 85, type II	ECTD4|HB5|Hb-5|K85|KRTHB5|hHb5	2	8	1.74178	0.800559	0.445243	0.351402
SEMG2	6407	semenogelin II	SGII	2	6	2.18096	1.12496	0.446197	0.350474
ACTN4	81	actinin, alpha 4	ACTININ-4|FSGS|FSGS1	6	10	1.364	0.447844	0.448023	0.3487
TGM3	7053	transglutaminase 3	TGE	10	14	1.29662	0.374753	0.450527	0.34628
JUP	3728	junction plakoglobin	ARVD12|CTNNG|DP3|DPIII|PDGB|PKGB	51	62	1.3257	0.406758	0.453405	0.343514
KRT3	3850	keratin 3, type II	CK3|K3	159	130	0.818377	-0.289162	0.454773	0.342206
ECM1	1893	extracellular matrix protein 1	URBWD	1	2	1.21391	0.279663	0.455607	0.34141
COL1A1	1277	collagen, type I, alpha 1	OI4	1	0	0.842725	-0.246866	0.458521	0.338641
COL3A1	1281	collagen, type III, alpha 1	EDS4A	1	0	0.842725	-0.246866	0.458521	0.338641
KIAA0922	23240	KIAA0922	TMEM131L	1	0	0.842725	-0.246866	0.458521	0.338641
QPCT	25797	glutaminyl-peptide cyclotransferase	GCT|QC|sQC	1	0	0.842725	-0.246866	0.458521	0.338641
REPS2	9185	RALBP1 associated Eps domain containing 2	POB1	1	0	0.842725	-0.246866	0.458521	0.338641
TTN	7273	titin	CMD1G|CMH9|CMPD4|EOMFC|HMERF|LGMD2J|MYLK5|TMD	1	0	0.842725	-0.246866	0.458521	0.338641
HDLBP	3069	high density lipoprotein binding protein	HBP|PRO2900|VGL	30	21	0.6881	-0.539311	0.462591	0.334802
DLST	1743	dihydrolipoamide S-succinyltransferase (E2 component of 2-oxo-glutarate complex)	DLTS	5	8	1.34968	0.432617	0.464315	0.333187
OXCT1	5019	3-oxoacid CoA transferase 1	OXCT|SCOT	2	4	1.30006	0.378582	0.465398	0.332176
SLC25A3	5250	solute carrier family 25 (mitochondrial carrier; phosphate carrier), member 3	OK/SW-cl.48|PHC|PTP	2	4	1.30006	0.378582	0.465398	0.332176
TOMM40	10452	translocase of outer mitochondrial membrane 40 homolog (yeast)	C19orf1|D19S1177E|PER-EC1|PEREC1|TOM40	2	4	1.30006	0.378582	0.465398	0.332176
RDX	5962	radixin	DFNB24	5	8	1.25529	0.328021	0.467781	0.329957
DSC1	1823	desmocollin 1	CDHF1|DG2/DG3	11	14	2.45177	1.29383	0.468117	0.329646
MRPS10	55173	mitochondrial ribosomal protein S10	MRP-S10|PNAS-122	8	5	0.987112	-0.0187144	0.46837	0.329411
TXN	7295	thioredoxin	TRDX|TRX|TRX1	4	7	1.48908	0.574421	0.468435	0.329351
DDX5	1655	DEAD (Asp-Glu-Ala-Asp) box helicase 5	G17P1|HLR1|HUMP68|p68	18	13	0.703808	-0.506746	0.469213	0.32863
ROCK1	6093	Rho-associated, coiled-coil containing protein kinase 1	P160ROCK|ROCK-I	3	11	1.85524	0.891602	0.473604	0.324585
YWHAZ	7534	tyrosine 3-monooxygenase/tryptophan 5-monooxygenase activation protein, zeta	14-3-3-zeta|HEL-S-3|HEL4|KCIP-1|YWHAD	21	27	1.43442	0.520464	0.474461	0.323799
MRPL9	65005	mitochondrial ribosomal protein L9	L9mt	3	2	0.836292	-0.257921	0.474879	0.323417
RPS5	6193	ribosomal protein S5	S5	3	2	0.836292	-0.257921	0.474879	0.323417
SF3B3	23450	splicing factor 3b, subunit 3, 130kDa	RSE1|SAP130|SF3b130|STAF130	5	2	0.69365	-0.52772	0.47607	0.32233
BLMH	642	bleomycin hydrolase	BH|BMH	2	6	2.47425	1.30699	0.476704	0.321751
MRPL24	79590	mitochondrial ribosomal protein L24	L24mt|MRP-L18|MRP-L24	1	3	1.29993	0.378437	0.477279	0.321228
MTX2	10651	metaxin 2	-	1	3	1.29993	0.378437	0.477279	0.321228
NDUFS7	374291	NADH dehydrogenase (ubiquinone) Fe-S protein 7, 20kDa (NADH-coenzyme Q reductase)	CI-20|CI-20KD|MY017|PSST	1	3	1.29993	0.378437	0.477279	0.321228
UQCRB	7381	ubiquinol-cytochrome c reductase binding protein	MC3DN3|QCR7|QP-C|QPC|UQBC|UQBP|UQCR6|UQPC	1	3	1.29993	0.378437	0.477279	0.321228
ACO2	50	aconitase 2, mitochondrial	ACONM|ICRD	5	2	1.06385	0.0893011	0.480993	0.317861
MRPS33	51650	mitochondrial ribosomal protein S33	CGI-139|MRP-S33|PTD003|S33mt	3	2	0.844483	-0.24386	0.483769	0.315362
RPS8	6202	ribosomal protein S8	S8	3	2	0.844483	-0.24386	0.483769	0.315362
PGD	5226	phosphogluconate dehydrogenase	6PGD	1	3	1.40539	0.490972	0.484884	0.314362
SERPINB12	89777	serpin peptidase inhibitor, clade B (ovalbumin), member 12	YUKOPIN	10	12	2.0858	1.0606	0.486456	0.312957
HSPD1	3329	heat shock 60kDa protein 1 (chaperonin)	CPN60|GROEL|HLD4|HSP-60|HSP60|HSP65|HuCHA60|SPG13	123	158	1.19863	0.261388	0.487135	0.312351
CLPX	10845	caseinolytic mitochondrial matrix peptidase chaperone subunit	-	5	2	0.801324	-0.319542	0.488952	0.310734
DSC3	1825	desmocollin 3	CDHF3|DSC|DSC1|DSC2|DSC4|HT-CP	5	2	0.801324	-0.319542	0.488952	0.310734
ERAL1	26284	Era-like 12S mitochondrial rRNA chaperone 1	ERA|ERAL1A|H-ERA|HERA-A|HERA-B	5	2	0.801324	-0.319542	0.488952	0.310734
PGRMC1	10857	progesterone receptor membrane component 1	HPR6.6|MPR	2	5	1.84825	0.88616	0.49044	0.309414
ZNF326	284695	zinc finger protein 326	ZAN75|ZIRD|Zfp326|dJ871E2.1	3	1	0.82647	-0.274966	0.494137	0.306152
PNPT1	87178	polyribonucleotide nucleotidyltransferase 1	COXPD13|DFNB70|OLD35|PNPASE|old-35	10	6	0.709509	-0.495106	0.49476	0.305605
DDOST	1650	dolichyl-diphosphooligosaccharide--protein glycosyltransferase subunit (non-catalytic)	AGER1|CDG1R|OKSWcl45|OST|OST48|WBP1	4	8	1.62339	0.699006	0.502624	0.298757
COX5A	9377	cytochrome c oxidase subunit Va	COX|COX-VA|VA	4	6	1.20157	0.264924	0.50298	0.298449
NDUFA5	4698	NADH dehydrogenase (ubiquinone) 1 alpha subcomplex, 5	B13|CI-13KD-B|CI-13kB|NUFM|UQOR13	4	6	1.20157	0.264924	0.50298	0.298449
CALML5	51806	calmodulin-like 5	CLSP	12	9	0.78374	-0.351554	0.50341	0.298078
COX6B1	1340	cytochrome c oxidase subunit VIb polypeptide 1 (ubiquitous)	COX6B|COXG|COXVIb1	2	1	0.863863	-0.211125	0.504684	0.29698
DYNLL1	8655	dynein, light chain, LC8-type 1	DLC1|DLC8|DNCL1|DNCLC1|LC8|LC8a|PIN|hdlc1	2	1	0.863863	-0.211125	0.504684	0.29698
EMC8	10328	ER membrane protein complex subunit 8	C16orf2|C16orf4|COX4NB|FAM158B|NOC4	2	1	0.863863	-0.211125	0.504684	0.29698
FAR1	84188	fatty acyl CoA reductase 1	MLSTD2|PFCRD|SDR10E1	2	1	0.863863	-0.211125	0.504684	0.29698
KPRP	448834	keratinocyte proline-rich protein	C1orf45	2	1	0.863863	-0.211125	0.504684	0.29698
LOC102723728	102723728	nodal modulator 3-like	-	2	1	0.863863	-0.211125	0.504684	0.29698
MRPL45	84311	mitochondrial ribosomal protein L45	L45mt|MRP-L45	2	1	0.863863	-0.211125	0.504684	0.29698
MTDH	92140	metadherin	3D3|AEG-1|AEG1|LYRIC|LYRIC/3D3	2	1	0.863863	-0.211125	0.504684	0.29698
RAB5A	5868	RAB5A, member RAS oncogene family	RAB5	2	1	0.863863	-0.211125	0.504684	0.29698
RAB5B	5869	RAB5B, member RAS oncogene family	-	2	1	0.863863	-0.211125	0.504684	0.29698
VWA8	23078	von Willebrand factor A domain containing 8	KIAA0564	2	1	0.863863	-0.211125	0.504684	0.29698
DYNC1I2	1781	dynein, cytoplasmic 1, intermediate chain 2	DNCI2|IC2	7	6	0.913838	-0.129989	0.50608	0.29578
DNAJC19	131118	DnaJ (Hsp40) homolog, subfamily C, member 19	PAM18|TIM14|TIMM14	2	3	1.22939	0.297943	0.506223	0.295658
PYCR2	29920	pyrroline-5-carboxylate reductase family, member 2	P5CR2	23	16	0.669891	-0.578002	0.5114	0.291239
ATP2A1	487	ATPase, Ca++ transporting, cardiac muscle, fast twitch 1	ATP2A|SERCA1	3	2	0.944153	-0.0829075	0.511494	0.291159
SCO2	9997	SCO2 cytochrome c oxidase assembly protein	CEMCOX1|MYP6|SCO1L	3	2	0.944153	-0.0829075	0.511494	0.291159
AGPS	8540	alkylglycerone phosphate synthase	ADAP-S|ADAS|ADHAPS|ADPS|ALDHPSY	2	5	1.31265	0.392478	0.512624	0.290201
TUBB8	347688	tubulin, beta 8 class VIII	bA631M21.2	17	22	1.58013	0.660044	0.514299	0.288784
CCAR1	55749	cell division cycle and apoptosis regulator 1	-	2	1	1.07146	0.099578	0.515013	0.288182
PDHX	8050	pyruvate dehydrogenase complex, component X	DLDBP|E3BP|OPDX|PDX1|proX	2	1	1.07146	0.099578	0.515013	0.288182
RPS20	6224	ribosomal protein S20	S20	2	1	1.07146	0.099578	0.515013	0.288182
ATP5J2-PTCD1	100526740	ATP5J2-PTCD1 readthrough	-	10	6	0.625121	-0.677793	0.518929	0.284892
KRT15	3866	keratin 15, type I	CK15|K15|K1CO	181	159	0.852851	-0.229634	0.520484	0.283592
KRT6B	3854	keratin 6B, type II	CK-6B|CK6B|K6B|KRTL1|PC2|PC4	524	463	0.885421	-0.175564	0.521	0.283162
MIF	4282	macrophage migration inhibitory factor (glycosylation-inhibiting factor)	GIF|GLIF|MMIF	28	36	1.26211	0.335838	0.522328	0.282057
AZGP1	563	alpha-2-glycoprotein 1, zinc-binding	ZA2G|ZAG	11	14	1.30727	0.386557	0.522575	0.281851
ATP1A3	478	ATPase, Na+/K+ transporting, alpha 3 polypeptide	AHC2|CAPOS|DYT12|RDP	31	39	1.21868	0.285315	0.523698	0.280919
NACA	4666	nascent polypeptide-associated complex alpha subunit	HSD48|NACA1|skNAC	26	23	0.891312	-0.165998	0.525482	0.279442
HNRNPM	4670	heterogeneous nuclear ribonucleoprotein M	CEAR|HNRNPM4|HNRPM|HNRPM4|HTGR1|NAGR1|hnRNP M	35	16	0.515361	-0.956345	0.526384	0.278698
MRPS14	63931	mitochondrial ribosomal protein S14	DJ262D12.2|HSMRPS14|MRP-S14|S14mt	11	9	0.816683	-0.292152	0.527311	0.277933
APOD	347	apolipoprotein D	-	1	5	2.29794	1.20034	0.527501	0.277777
CASP14	23581	caspase 14, apoptosis-related cysteine peptidase	-	24	20	0.817629	-0.290482	0.530969	0.27493
HNRNPUL2	221092	heterogeneous nuclear ribonucleoprotein U-like 2	HNRPUL2|SAF-A2	5	2	0.823376	-0.280376	0.532157	0.27396
HRNR	388697	hornerin	FLG3|S100A16|S100a18	26	22	0.83481	-0.260479	0.536134	0.270727
DHX30	22907	DEAH (Asp-Glu-Ala-His) box helicase 30	DDX30|RETCOR	47	33	0.73179	-0.450498	0.538262	0.269006
HIST1H1C	3006	histone cluster 1, H1c	H1.2|H1C|H1F2|H1s-1	6	9	1.52893	0.612521	0.541066	0.26675
HIST1H1D	3007	histone cluster 1, H1d	H1.3|H1D|H1F3|H1s-2	6	9	1.52893	0.612521	0.541066	0.26675
HIST1H1E	3008	histone cluster 1, H1e	H1.4|H1E|H1F4|H1s-4|dJ221C16.5	6	9	1.52893	0.612521	0.541066	0.26675
GSTM3	2947	glutathione S-transferase mu 3 (brain)	GST5|GSTB|GSTM3-3|GTM3	5	3	1.01209	0.0173376	0.543539	0.264769
TUBB1	81027	tubulin, beta 1 class VI	-	15	19	1.47353	0.559281	0.545636	0.263097
CIRBP	1153	cold inducible RNA binding protein	CIRP	2	1	0.813953	-0.296983	0.550199	0.25948
MAGOHB	55110	mago-nashi homolog B (Drosophila)	MGN2|mago|magoh	2	1	0.813953	-0.296983	0.550199	0.25948
PMPCA	23203	peptidase (mitochondrial processing) alpha	Alpha-MPP|INPP5E|P-55	2	1	0.813953	-0.296983	0.550199	0.25948
SUCLA2	8803	succinate-CoA ligase, ADP-forming, beta subunit	A-BETA|MTDPS5|SCS-betaA	2	1	0.813953	-0.296983	0.550199	0.25948
TMPO	7112	thymopoietin	CMD1T|LAP2|LEMD4|PRO0868|TP	7	5	0.832534	-0.264419	0.550486	0.259254
HNRNPA0	10949	heterogeneous nuclear ribonucleoprotein A0	HNRPA0	3	2	0.878669	-0.186607	0.551432	0.258508
HNRNPH2	3188	heterogeneous nuclear ribonucleoprotein H2 (H')	FTP3|HNRPH'|HNRPH2|hnRNPH'	7	5	0.792561	-0.335406	0.553199	0.257118
SRSF7	6432	serine/arginine-rich splicing factor 7	9G8|AAG3|SFRS7	4	3	0.879567	-0.185135	0.554984	0.25572
TOMM20	9804	translocase of outer mitochondrial membrane 20 homolog (yeast)	MAS20|MOM19|TOM20	4	3	0.879567	-0.185135	0.554984	0.25572
EZR	7430	ezrin	CVIL|CVL|HEL-S-105|VIL2	7	11	1.3523	0.435416	0.558015	0.253354
POLDIP3	84271	polymerase (DNA-directed), delta interacting protein 3	PDIP46|SKAR	8	4	0.664606	-0.589429	0.559404	0.252274
SEMG1	6406	semenogelin I	CT103|SEMG|SGI|dJ172H20.2	3	5	1.90963	0.933295	0.560921	0.251098
DDX3Y	8653	DEAD (Asp-Glu-Ala-Asp) box helicase 3, Y-linked	DBY	13	10	0.82312	-0.280826	0.562271	0.250054
KRT24	192666	keratin 24, type I	K24|KA24	53	47	0.8729	-0.196112	0.562725	0.249704
KRT76	51350	keratin 76, type II	HUMCYT2A|KRT2B|KRT2P	201	171	0.843789	-0.245045	0.563165	0.249364
HBD	3045	hemoglobin, delta	-	5	3	1.02855	0.0406159	0.565041	0.24792
PDE4D	5144	phosphodiesterase 4D, cAMP-specific	ACRDYS2|DPDE3|HSPDE4D|PDE43|PDE4DN2|STRK1	2	4	1.24045	0.310867	0.565649	0.247453
OAT	4942	ornithine aminotransferase	GACR|HOGA|OATASE|OKT	14	21	1.26174	0.335414	0.565981	0.247198
KRT26	353288	keratin 26, type I	CK26|K25IRS2|K26|KRT25B	68	63	0.91376	-0.130113	0.568947	0.244928
ACOT1	641371	acyl-CoA thioesterase 1	ACH2|CTE-1|LACH2	0	1	1.22763	0.295879	0.569846	0.244242
ACOT2	10965	acyl-CoA thioesterase 2	CTE-IA|CTE1A|MTE1|PTE2|PTE2A|ZAP128	0	1	1.22763	0.295879	0.569846	0.244242
ACSL4	2182	acyl-CoA synthetase long-chain family member 4	ACS4|FACL4|LACS4|MRX63|MRX68	0	1	1.22763	0.295879	0.569846	0.244242
ANXA6	309	annexin A6	ANX6|CBP68	0	1	1.22763	0.295879	0.569846	0.244242
CNPY2	10330	canopy FGF signaling regulator 2	HP10390|MSAP|TMEM4|ZSIG9	0	1	1.22763	0.295879	0.569846	0.244242
CPSF7	79869	cleavage and polyadenylation specific factor 7, 59kDa	CFIm59	0	1	1.22763	0.295879	0.569846	0.244242
CSRP2	1466	cysteine and glycine-rich protein 2	CRP2|LMO5|SmLIM	0	1	1.22763	0.295879	0.569846	0.244242
CSTF2	1478	cleavage stimulation factor, 3' pre-RNA, subunit 2, 64kDa	CstF-64	0	1	1.22763	0.295879	0.569846	0.244242
CSTF2T	23283	cleavage stimulation factor, 3' pre-RNA, subunit 2, 64kDa, tau variant	CstF-64T	0	1	1.22763	0.295879	0.569846	0.244242
FAM227B	196951	family with sequence similarity 227, member B	C15orf33	0	1	1.22763	0.295879	0.569846	0.244242
FIS1	51024	fission 1 (mitochondrial outer membrane) homolog (S. cerevisiae)	CGI-135|TTC11	0	1	1.22763	0.295879	0.569846	0.244242
FLNB	2317	filamin B, beta	ABP-278|ABP-280|AOI|FH1|FLN-B|FLN1L|LRS1|SCT|TABP|TAP	0	1	1.22763	0.295879	0.569846	0.244242
FLNC	2318	filamin C, gamma	ABP-280|ABP280A|ABPA|ABPL|FLN2|MFM5|MPD4	0	1	1.22763	0.295879	0.569846	0.244242
GATAD2B	57459	GATA zinc finger domain containing 2B	MRD18|P66beta|p68	0	1	1.22763	0.295879	0.569846	0.244242
GCDH	2639	glutaryl-CoA dehydrogenase	ACAD5|GCD	0	1	1.22763	0.295879	0.569846	0.244242
MCCC2	64087	methylcrotonoyl-CoA carboxylase 2 (beta)	MCCB	0	1	1.22763	0.295879	0.569846	0.244242
MTA2	9219	metastasis associated 1 family, member 2	MTA1L1|PID	0	1	1.22763	0.295879	0.569846	0.244242
MYH13	8735	myosin, heavy chain 13, skeletal muscle	MyHC-IIL|MyHC-eo	0	1	1.22763	0.295879	0.569846	0.244242
MYH6	4624	myosin, heavy chain 6, cardiac muscle, alpha	ASD3|CMD1EE|CMH14|MYHC|MYHCA|SSS3|alpha-MHC	0	1	1.22763	0.295879	0.569846	0.244242
MYH7	4625	myosin, heavy chain 7, cardiac muscle, beta	CMD1S|CMH1|MPD1|MYHCB|SPMD|SPMM	0	1	1.22763	0.295879	0.569846	0.244242
NAP1L1	4673	nucleosome assembly protein 1-like 1	NAP1|NAP1L|NRP	0	1	1.22763	0.295879	0.569846	0.244242
NDUFA4	4697	NDUFA4, mitochondrial complex associated	CI-9k|CI-MLRQ|MLRQ	0	1	1.22763	0.295879	0.569846	0.244242
NDUFB9	4715	NADH dehydrogenase (ubiquinone) 1 beta subcomplex, 9, 22kDa	B22|CI-B22|LYRM3|UQOR22	0	1	1.22763	0.295879	0.569846	0.244242
NPM1	4869	nucleophosmin (nucleolar phosphoprotein B23, numatrin)	B23|NPM	0	1	1.22763	0.295879	0.569846	0.244242
OSTC	58505	oligosaccharyltransferase complex subunit (non-catalytic)	DC2	0	1	1.22763	0.295879	0.569846	0.244242
RDH13	112724	retinol dehydrogenase 13 (all-trans/9-cis)	SDR7C3	0	1	1.22763	0.295879	0.569846	0.244242
RNPS1	10921	RNA binding protein S1, serine-rich domain	E5.1	0	1	1.22763	0.295879	0.569846	0.244242
SERPINB3	6317	serpin peptidase inhibitor, clade B (ovalbumin), member 3	HsT1196|SCC|SCCA-1|SCCA-PD|SCCA1|T4-A	0	1	1.22763	0.295879	0.569846	0.244242
SERPINB4	6318	serpin peptidase inhibitor, clade B (ovalbumin), member 4	LEUPIN|PI11|SCCA-2|SCCA1|SCCA2	0	1	1.22763	0.295879	0.569846	0.244242
SUCLG2	8801	succinate-CoA ligase, GDP-forming, beta subunit	GBETA	0	1	1.22763	0.295879	0.569846	0.244242
UGGT1	56886	UDP-glucose glycoprotein glucosyltransferase 1	HUGT1|UGCGL1|UGT1	0	1	1.22763	0.295879	0.569846	0.244242
XPNPEP3	63929	X-prolyl aminopeptidase 3, mitochondrial	APP3|ICP55|NPHPL1	0	1	1.22763	0.295879	0.569846	0.244242
ZNF248	57209	zinc finger protein 248	bA162G10.3	0	1	1.22763	0.295879	0.569846	0.244242
ACAT1	38	acetyl-CoA acetyltransferase 1	ACAT|MAT|T2|THIL	7	11	1.29314	0.370881	0.570766	0.243542
AIFM1	9131	apoptosis-inducing factor, mitochondrion-associated, 1	AIF|CMT2D|CMTX4|COWCK|COXPD6|NADMR|NAMSD|PDCD8	10	17	1.48132	0.566879	0.571421	0.243044
APBA1	320	amyloid beta (A4) precursor protein-binding, family A, member 1	D9S411E|LIN10|MINT1|X11|X11A|X11ALPHA	0	1	1.21305	0.27864	0.571733	0.242806
CA6	765	carbonic anhydrase VI	CA-VI|GUSTIN	0	1	1.21305	0.27864	0.571733	0.242806
DSG4	147409	desmoglein 4	CDGF13|CDHF13|HYPT6|LAH	0	1	1.21305	0.27864	0.571733	0.242806
FGD6	55785	FYVE, RhoGEF and PH domain containing 6	ZFYVE24	0	1	1.21305	0.27864	0.571733	0.242806
IGLL5	100423062	immunoglobulin lambda-like polypeptide 5	-	0	1	1.21305	0.27864	0.571733	0.242806
MYH2	4620	myosin, heavy chain 2, skeletal muscle, adult	IBM3|MYH2A|MYHSA2|MYHas8|MyHC-2A|MyHC-IIa	0	1	1.21305	0.27864	0.571733	0.242806
PIGR	5284	polymeric immunoglobulin receptor	-	0	1	1.21305	0.27864	0.571733	0.242806
RBBP6	5930	retinoblastoma binding protein 6	MY038|P2P-R|PACT|RBQ-1|SNAMA	0	1	1.21305	0.27864	0.571733	0.242806
RPLP1	6176	ribosomal protein, large, P1	LP1|P1|RPP1	0	1	1.21305	0.27864	0.571733	0.242806
SCGB1D2	10647	secretoglobin, family 1D, member 2	LIPB|LPHB|LPNB	0	1	1.21305	0.27864	0.571733	0.242806
SPRR2A	6700	small proline-rich protein 2A	-	0	1	1.21305	0.27864	0.571733	0.242806
SPRR2B	6701	small proline-rich protein 2B	-	0	1	1.21305	0.27864	0.571733	0.242806
SPRR2D	6703	small proline-rich protein 2D	-	0	1	1.21305	0.27864	0.571733	0.242806
SPRR2E	6704	small proline-rich protein 2E	-	0	1	1.21305	0.27864	0.571733	0.242806
SPRR2G	6706	small proline-rich protein 2G	-	0	1	1.21305	0.27864	0.571733	0.242806
TMA7	51372	translation machinery associated 7 homolog (S. cerevisiae)	CCDC72|HSPC016	0	1	1.21305	0.27864	0.571733	0.242806
ZFYVE16	9765	zinc finger, FYVE domain containing 16	PPP1R69	0	1	1.21305	0.27864	0.571733	0.242806
ZFYVE9	9372	zinc finger, FYVE domain containing 9	MADHIP|NSP|PPP1R173|SARA|SMADIP	0	1	1.21305	0.27864	0.571733	0.242806
NDUFS1	4719	NADH dehydrogenase (ubiquinone) Fe-S protein 1, 75kDa (NADH-coenzyme Q reductase)	CI-75Kd|CI-75k|PRO1304	6	9	1.531	0.614477	0.574089	0.241021
SNRPB	6628	small nuclear ribonucleoprotein polypeptides B and B1	COD|SNRPB1|Sm-B/B'|SmB/B'|SmB/SmB'|snRNP-B	4	3	0.894523	-0.160809	0.575111	0.240249
SNRPN	6638	small nuclear ribonucleoprotein polypeptide N	HCERN3|PWCR|RT-LI|SM-D|SMN|SNRNP-N|SNURF-SNRPN|sm-N	4	3	0.894523	-0.160809	0.575111	0.240249
UQCRC1	7384	ubiquinol-cytochrome c reductase core protein I	D3S3191|QCR1|UQCR1	6	9	1.23254	0.301634	0.576509	0.239194
WDR77	79084	WD repeat domain 77	HKMT1069|MEP-50|MEP50|Nbla10071|p44|p44/Mep50	7	6	0.960226	-0.0585537	0.579043	0.237289
BCAP31	10134	B-cell receptor-associated protein 31	6C6-AG|BAP31|CDM|DDCH|DXS1357E	4	6	1.18545	0.24543	0.57944	0.236992
ACSL3	2181	acyl-CoA synthetase long-chain family member 3	ACS3|FACL3|PRO2194	0	1	1.26547	0.339679	0.579547	0.236911
AGFG1	3267	ArfGAP with FG repeats 1	HRB|RAB|RIP	0	1	1.26547	0.339679	0.579547	0.236911
ALDH3A2	224	aldehyde dehydrogenase 3 family, member A2	ALDH10|FALDH|SLS	0	1	1.26547	0.339679	0.579547	0.236911
ANXA7	310	annexin A7	ANX7|SNX|SYNEXIN	0	1	1.26547	0.339679	0.579547	0.236911
ARF4	378	ADP-ribosylation factor 4	ARF2	0	1	1.26547	0.339679	0.579547	0.236911
ARHGAP39	80728	Rho GTPase activating protein 39	CrGAP|Vilse	0	1	1.26547	0.339679	0.579547	0.236911
ATP5H	10476	ATP synthase, H+ transporting, mitochondrial Fo complex, subunit d	ATPQ	0	1	1.26547	0.339679	0.579547	0.236911
ATP5J2	9551	ATP synthase, H+ transporting, mitochondrial Fo complex, subunit F2	ATP5JL	0	1	1.26547	0.339679	0.579547	0.236911
ATP6V1B2	526	ATPase, H+ transporting, lysosomal 56/58kDa, V1 subunit B2	ATP6B1B2|ATP6B2|HO57|VATB|VPP3|Vma2	0	1	1.26547	0.339679	0.579547	0.236911
BOD1	91272	biorientation of chromosomes in cell division 1	FAM44B	0	1	1.26547	0.339679	0.579547	0.236911
CACYBP	27101	calcyclin binding protein	GIG5|PNAS-107|S100A6BP|SIP	0	1	1.26547	0.339679	0.579547	0.236911
CAPZA2	830	capping protein (actin filament) muscle Z-line, alpha 2	CAPPA2|CAPZ	0	1	1.26547	0.339679	0.579547	0.236911
CCT7	10574	chaperonin containing TCP1, subunit 7 (eta)	CCTETA|CCTH|NIP7-1|TCP1ETA	0	1	1.26547	0.339679	0.579547	0.236911
CENPV	201161	centromere protein V	3110013H01Rik|CENP-V|PRR6|p30	0	1	1.26547	0.339679	0.579547	0.236911
CLPTM1	1209	cleft lip and palate associated transmembrane protein 1	-	0	1	1.26547	0.339679	0.579547	0.236911
CMC2	56942	C-x(9)-C motif containing 2	2310061C15Rik|C16orf61|DC13	0	1	1.26547	0.339679	0.579547	0.236911
COX7A2L	9167	cytochrome c oxidase subunit VIIa polypeptide 2 like	COX7AR|COX7RP|EB1|SIG81	0	1	1.26547	0.339679	0.579547	0.236911
CPVL	54504	carboxypeptidase, vitellogenic-like	HVLP	0	1	1.26547	0.339679	0.579547	0.236911
CYB5R1	51706	cytochrome b5 reductase 1	B5R.1|B5R1|B5R2|NQO3A2|humb5R2	0	1	1.26547	0.339679	0.579547	0.236911
DCAF7	10238	DDB1 and CUL4 associated factor 7	AN11|HAN11|SWAN-1|WDR68	0	1	1.26547	0.339679	0.579547	0.236911
DDRGK1	65992	DDRGK domain containing 1	C20orf116|UFBP1|dJ1187M17.3	0	1	1.26547	0.339679	0.579547	0.236911
DPM1	8813	dolichyl-phosphate mannosyltransferase polypeptide 1, catalytic subunit	CDGIE|MPDS	0	1	1.26547	0.339679	0.579547	0.236911
DRG1	4733	developmentally regulated GTP binding protein 1	NEDD3	0	1	1.26547	0.339679	0.579547	0.236911
ECSIT	51295	ECSIT signalling integrator	SITPEC	0	1	1.26547	0.339679	0.579547	0.236911
EIF3H	8667	eukaryotic translation initiation factor 3, subunit H	EIF3S3|eIF3-gamma|eIF3-p40	0	1	1.26547	0.339679	0.579547	0.236911
FAHD1	81889	fumarylacetoacetate hydrolase domain containing 1	C16orf36|YISKL	0	1	1.26547	0.339679	0.579547	0.236911
FAM3C	10447	family with sequence similarity 3, member C	GS3786|ILEI	0	1	1.26547	0.339679	0.579547	0.236911
GNA12	2768	guanine nucleotide binding protein (G protein) alpha 12	NNX3|RMP|gep	0	1	1.26547	0.339679	0.579547	0.236911
GNA13	10672	guanine nucleotide binding protein (G protein), alpha 13	G13	0	1	1.26547	0.339679	0.579547	0.236911
GNAI1	2770	guanine nucleotide binding protein (G protein), alpha inhibiting activity polypeptide 1	Gi	0	1	1.26547	0.339679	0.579547	0.236911
GNAI2	2771	guanine nucleotide binding protein (G protein), alpha inhibiting activity polypeptide 2	GIP|GNAI2B|H_LUCA15.1|H_LUCA16.1	0	1	1.26547	0.339679	0.579547	0.236911
GNAI3	2773	guanine nucleotide binding protein (G protein), alpha inhibiting activity polypeptide 3	87U6|ARCND1	0	1	1.26547	0.339679	0.579547	0.236911
GNAL	2774	guanine nucleotide binding protein (G protein), alpha activating activity polypeptide, olfactory type	DYT25	0	1	1.26547	0.339679	0.579547	0.236911
GNAO1	2775	guanine nucleotide binding protein (G protein), alpha activating activity polypeptide O	EIEE17|G-ALPHA-o|GNAO	0	1	1.26547	0.339679	0.579547	0.236911
GNAS	2778	GNAS complex locus	AHO|C20orf45|GNAS1|GPSA|GSA|GSP|NESP|PHP1A|PHP1B|PHP1C|POH	0	1	1.26547	0.339679	0.579547	0.236911
GNAT1	2779	guanine nucleotide binding protein (G protein), alpha transducing activity polypeptide 1	CSNBAD3|GBT1|GNATR	0	1	1.26547	0.339679	0.579547	0.236911
GNAT2	2780	guanine nucleotide binding protein (G protein), alpha transducing activity polypeptide 2	ACHM4|GNATC	0	1	1.26547	0.339679	0.579547	0.236911
GNAT3	346562	guanine nucleotide binding protein, alpha transducing 3	GDCA	0	1	1.26547	0.339679	0.579547	0.236911
GNB1	2782	guanine nucleotide binding protein (G protein), beta polypeptide 1	-	0	1	1.26547	0.339679	0.579547	0.236911
GNB2	2783	guanine nucleotide binding protein (G protein), beta polypeptide 2	-	0	1	1.26547	0.339679	0.579547	0.236911
GNB4	59345	guanine nucleotide binding protein (G protein), beta polypeptide 4	CMTD1F	0	1	1.26547	0.339679	0.579547	0.236911
GNG5	2787	guanine nucleotide binding protein (G protein), gamma 5	-	0	1	1.26547	0.339679	0.579547	0.236911
GTPBP10	85865	GTP-binding protein 10 (putative)	ObgH2|UG0751c10	0	1	1.26547	0.339679	0.579547	0.236911
HARS	3035	histidyl-tRNA synthetase	HRS|USH3B	0	1	1.26547	0.339679	0.579547	0.236911
HARS2	23438	histidyl-tRNA synthetase 2, mitochondrial	HARSL|HARSR|HO3|PRLTS2	0	1	1.26547	0.339679	0.579547	0.236911
HDAC1	3065	histone deacetylase 1	GON-10|HD1|RPD3|RPD3L1	0	1	1.26547	0.339679	0.579547	0.236911
HDAC2	3066	histone deacetylase 2	HD2|RPD3|YAF1	0	1	1.26547	0.339679	0.579547	0.236911
HOMER1	9456	homer scaffolding protein 1	HOMER|HOMER1A|HOMER1B|HOMER1C|SYN47|Ves-1	0	1	1.26547	0.339679	0.579547	0.236911
HSD17B12	51144	hydroxysteroid (17-beta) dehydrogenase 12	KAR|SDR12C1	0	1	1.26547	0.339679	0.579547	0.236911
HTRA2	27429	HtrA serine peptidase 2	OMI|PARK13|PRSS25	0	1	1.26547	0.339679	0.579547	0.236911
IDH3B	3420	isocitrate dehydrogenase 3 (NAD+) beta	H-IDHB|RP46	0	1	1.26547	0.339679	0.579547	0.236911
KCNG1	3755	potassium channel, voltage gated modifier subfamily G, member 1	K13|KCNG|KV6.1|kH2	0	1	1.26547	0.339679	0.579547	0.236911
KIF20B	9585	kinesin family member 20B	CT90|KRMP1|MPHOSPH1|MPP-1|MPP1	0	1	1.26547	0.339679	0.579547	0.236911
KPNA2	3838	karyopherin alpha 2 (RAG cohort 1, importin alpha 1)	IPOA1|QIP2|RCH1|SRP1alpha	0	1	1.26547	0.339679	0.579547	0.236911
LBR	3930	lamin B receptor	DHCR14B|LMN2R|PHA|TDRD18	0	1	1.26547	0.339679	0.579547	0.236911
LMAN2	10960	lectin, mannose-binding 2	C5orf8|GP36B|VIP36	0	1	1.26547	0.339679	0.579547	0.236911
LYRM7	90624	LYR motif containing 7	C5orf31|MC3DN8|MZM1L	0	1	1.26547	0.339679	0.579547	0.236911
MARCKSL1	65108	MARCKS-like 1	F52|MACMARCKS|MLP|MLP1|MRP	0	1	1.26547	0.339679	0.579547	0.236911
MAVS	57506	mitochondrial antiviral signaling protein	CARDIF|IPS-1|IPS1|VISA	0	1	1.26547	0.339679	0.579547	0.236911
MCM5	4174	minichromosome maintenance complex component 5	CDC46|P1-CDC46	0	1	1.26547	0.339679	0.579547	0.236911
MRPL34	64981	mitochondrial ribosomal protein L34	L34mt	0	1	1.26547	0.339679	0.579547	0.236911
MRPL47	57129	mitochondrial ribosomal protein L47	CGI-204|L47mt|MRP-L47|NCM1	0	1	1.26547	0.339679	0.579547	0.236911
MRPS24	64951	mitochondrial ribosomal protein S24	HSPC335|MRP-S24|S24mt|bMRP-47|bMRP47	0	1	1.26547	0.339679	0.579547	0.236911
MTX1	4580	metaxin 1	MTX|MTXN	0	1	1.26547	0.339679	0.579547	0.236911
MYH14	79784	myosin, heavy chain 14, non-muscle	DFNA4|DFNA4A|FP17425|MHC16|MYH17|NMHC II-C|NMHC-II-C|PNMHH|myosin	0	1	1.26547	0.339679	0.579547	0.236911
NOA1	84273	nitric oxide associated 1	C4orf14|MTG3|hAtNOS1|hNOA1|mAtNOS1	0	1	1.26547	0.339679	0.579547	0.236911
NUBPL	80224	nucleotide binding protein-like	C14orf127|IND1|huInd1	0	1	1.26547	0.339679	0.579547	0.236911
OXA1L	5018	oxidase (cytochrome c) assembly 1-like	OXA1	0	1	1.26547	0.339679	0.579547	0.236911
PFKFB2	5208	6-phosphofructo-2-kinase/fructose-2,6-biphosphatase 2	PFK-2/FBPase-2	0	1	1.26547	0.339679	0.579547	0.236911
PGRMC2	10424	progesterone receptor membrane component 2	DG6|PMBP	0	1	1.26547	0.339679	0.579547	0.236911
PLD3	23646	phospholipase D family, member 3	AD19|HU-K4|HUK4	0	1	1.26547	0.339679	0.579547	0.236911
POR	5447	P450 (cytochrome) oxidoreductase	CPR|CYPOR|P450R	0	1	1.26547	0.339679	0.579547	0.236911
PPT1	5538	palmitoyl-protein thioesterase 1	CLN1|INCL|PPT	0	1	1.26547	0.339679	0.579547	0.236911
PSMB2	5690	proteasome (prosome, macropain) subunit, beta type, 2	HC7-I	0	1	1.26547	0.339679	0.579547	0.236911
PSMB6	5694	proteasome (prosome, macropain) subunit, beta type, 6	DELTA|LMPY|Y	0	1	1.26547	0.339679	0.579547	0.236911
PSMD11	5717	proteasome (prosome, macropain) 26S subunit, non-ATPase, 11	Rpn6|S9|p44.5	0	1	1.26547	0.339679	0.579547	0.236911
PTPN1	5770	protein tyrosine phosphatase, non-receptor type 1	PTP1B	0	1	1.26547	0.339679	0.579547	0.236911
QPCTL	54814	glutaminyl-peptide cyclotransferase-like	gQC	0	1	1.26547	0.339679	0.579547	0.236911
RAP1A	5906	RAP1A, member of RAS oncogene family	C21KG|G-22K|KREV-1|KREV1|RAP1|SMGP21	0	1	1.26547	0.339679	0.579547	0.236911
RAP1B	5908	RAP1B, member of RAS oncogene family	K-REV|RAL1B	0	1	1.26547	0.339679	0.579547	0.236911
RMDN3	55177	regulator of microtubule dynamics 3	FAM82A2|FAM82C|RMD-3|RMD3|ptpip51	0	1	1.26547	0.339679	0.579547	0.236911
RPL23	9349	ribosomal protein L23	L23|rpL17	0	1	1.26547	0.339679	0.579547	0.236911
RPL30	6156	ribosomal protein L30	L30	0	1	1.26547	0.339679	0.579547	0.236911
RPL7	6129	ribosomal protein L7	L7|humL7-1	0	1	1.26547	0.339679	0.579547	0.236911
RPS18	6222	ribosomal protein S18	D6S218E|HKE3|KE-3|KE3|S18	0	1	1.26547	0.339679	0.579547	0.236911
SERBP1	26135	SERPINE1 mRNA binding protein 1	CGI-55|CHD3IP|HABP4L|PAI-RBP1|PAIRBP1	0	1	1.26547	0.339679	0.579547	0.236911
SMIM4	440957	small integral membrane protein 4	C3orf78	0	1	1.26547	0.339679	0.579547	0.236911
SPINT2	10653	serine peptidase inhibitor, Kunitz type, 2	DIAR3|HAI-2|HAI2|Kop|PB	0	1	1.26547	0.339679	0.579547	0.236911
SRP14	6727	signal recognition particle 14kDa (homologous Alu RNA binding protein)	ALURBP	0	1	1.26547	0.339679	0.579547	0.236911
SSR1	6745	signal sequence receptor, alpha	TRAPA	0	1	1.26547	0.339679	0.579547	0.236911
STK38	11329	serine/threonine kinase 38	NDR|NDR1	0	1	1.26547	0.339679	0.579547	0.236911
SYNJ2BP	55333	synaptojanin 2 binding protein	ARIP2|OMP25	0	1	1.26547	0.339679	0.579547	0.236911
SYNJ2BP-COX16	100529257	SYNJ2BP-COX16 readthrough	-	0	1	1.26547	0.339679	0.579547	0.236911
TAB1	10454	TGF-beta activated kinase 1/MAP3K7 binding protein 1	3'-Tab1|MAP3K7IP1	0	1	1.26547	0.339679	0.579547	0.236911
TECR	9524	trans-2,3-enoyl-CoA reductase	GPSN2|MRT14|SC2|TER	0	1	1.26547	0.339679	0.579547	0.236911
TIMM23	100287932	translocase of inner mitochondrial membrane 23 homolog (yeast)	TIM23	0	1	1.26547	0.339679	0.579547	0.236911
TIMM23B	100652748	translocase of inner mitochondrial membrane 23 homolog B (yeast)	TIMM23|bA592B15.7	0	1	1.26547	0.339679	0.579547	0.236911
TIMM8A	1678	translocase of inner mitochondrial membrane 8 homolog A (yeast)	DDP|DDP1|DFN1|MTS|TIM8	0	1	1.26547	0.339679	0.579547	0.236911
TIMMDC1	51300	translocase of inner mitochondrial membrane domain containing 1	C3orf1	0	1	1.26547	0.339679	0.579547	0.236911
TMEM65	157378	transmembrane protein 65	-	0	1	1.26547	0.339679	0.579547	0.236911
TOR1A	1861	torsin family 1, member A (torsin A)	DQ2|DYT1	0	1	1.26547	0.339679	0.579547	0.236911
UQCC1	55245	ubiquinol-cytochrome c reductase complex assembly factor 1	BFZB|C20orf44|CBP3|UQCC	0	1	1.26547	0.339679	0.579547	0.236911
ZNF439	90594	zinc finger protein 439	-	0	1	1.26547	0.339679	0.579547	0.236911
ZNF440	126070	zinc finger protein 440	-	0	1	1.26547	0.339679	0.579547	0.236911
ZNF700	90592	zinc finger protein 700	-	0	1	1.26547	0.339679	0.579547	0.236911
ILF2	3608	interleukin enhancer binding factor 2	NF45|PRO3063	11	8	0.824715	-0.278032	0.582704	0.234552
UQCRC2	7385	ubiquinol-cytochrome c reductase core protein II	MC3DN5|QCR2|UQCR2	18	26	1.36267	0.446431	0.583991	0.233594
RPS14	6208	ribosomal protein S14	EMTB|S14	6	9	1.1982	0.260871	0.587243	0.231182
CCT2	10576	chaperonin containing TCP1, subunit 2 (beta)	99D8.1|CCT-beta|CCTB|HEL-S-100n|PRO1633|TCP-1-beta	2	4	1.20059	0.263746	0.58805	0.230585
NOMO1	23420	NODAL modulator 1	Nomo|PM5	2	4	1.20059	0.263746	0.58805	0.230585
NOMO2	283820	NODAL modulator 2	Nomo|PM5	2	4	1.20059	0.263746	0.58805	0.230585
NOMO3	408050	NODAL modulator 3	Nomo	2	4	1.20059	0.263746	0.58805	0.230585
NFIL3	4783	nuclear factor, interleukin 3 regulated	E4BP4|IL3BP1|NF-IL3A|NFIL3A	1	3	1.63832	0.712216	0.592156	0.227564
RANGAP1	5905	Ran GTPase activating protein 1	Fug1|RANGAP|SD	5	7	1.16969	0.226123	0.593595	0.22651
XRCC6	2547	X-ray repair complementing defective repair in Chinese hamster cells 6	CTC75|CTCBF|G22P1|KU70|ML8|TLAA	5	7	1.16969	0.226123	0.593595	0.22651
RBMXL2	27288	RNA binding motif protein, X-linked-like 2	HNRNPG-T|HNRNPGT|HNRPGT	1	2	1.31867	0.399079	0.596341	0.224506
NDUFV3	4731	NADH dehydrogenase (ubiquinone) flavoprotein 3, 10kDa	CI-10k|CI-9KD	6	3	0.825296	-0.277016	0.597197	0.223882
POF1B	79983	premature ovarian failure, 1B	POF|POF2B	3	4	1.31214	0.391919	0.600932	0.221175
TBRG4	9238	transforming growth factor beta regulator 4	CPR2|FASTKD4	19	15	0.798659	-0.324348	0.604216	0.218808
MRPL44	65080	mitochondrial ribosomal protein L44	COXPD16|L44MT|MRP-L44	4	6	1.2984	0.37674	0.605572	0.217835
PRKDC	5591	protein kinase, DNA-activated, catalytic polypeptide	DNA-PKcs|DNAPK|DNPK1|HYRC|HYRC1|IMD26|XRCC7|p350	2	5	1.26546	0.33966	0.607851	0.216203
GANAB	23193	glucosidase, alpha; neutral AB	G2AN|GLUII	3	5	1.23508	0.304599	0.608775	0.215544
MSN	4478	moesin	HEL70	3	5	1.23508	0.304599	0.608775	0.215544
PKM	5315	pyruvate kinase, muscle	CTHBP|HEL-S-30|OIP3|PK3|PKM2|TCB|THBP1	3	2	0.842535	-0.247192	0.609583	0.214967
ERP29	10961	endoplasmic reticulum protein 29	C12orf8|ERp28|ERp31|HEL-S-107|PDI-DB|PDIA9	2	1	0.877809	-0.188021	0.611563	0.213559
FAM136A	84908	family with sequence similarity 136, member A	-	2	1	0.877809	-0.188021	0.611563	0.213559
MYH4	4622	myosin, heavy chain 4, skeletal muscle	MYH2B|MyHC-2B|MyHC-IIb	2	1	0.877809	-0.188021	0.611563	0.213559
RBM14-RBM4	100526737	RBM14-RBM4 readthrough	COAZ	2	1	0.877809	-0.188021	0.611563	0.213559
CKB	1152	creatine kinase, brain	B-CK|BCK|CKBB|HEL-211|HEL-S-29	4	3	0.989912	-0.014628	0.61229	0.213043
THRAP3	9967	thyroid hormone receptor associated protein 3	TRAP150	4	3	0.989912	-0.014628	0.61229	0.213043
TOMM22	56993	translocase of outer mitochondrial membrane 22 homolog (yeast)	1C9-2|MST065|MSTP065|TOM22	5	7	1.36461	0.448488	0.612517	0.212882
KRT10	3858	keratin 10, type I	BCIE|BIE|CK10|EHK|K10|KPP	1161	1045	0.89222	-0.164529	0.615328	0.210893
TUFM	7284	Tu translation elongation factor, mitochondrial	COXPD4|EF-TuMT|EFTU|P43	22	31	1.22479	0.292532	0.615779	0.210575
KRT82	3888	keratin 82, type II	HB2|Hb-2|KRTHB2	2	4	1.21113	0.27635	0.617442	0.209404
KRT20	54474	keratin 20, type I	CD20|CK-20|CK20|K20|KRT21	50	43	0.875423	-0.191948	0.619785	0.207759
ACTA1	58	actin, alpha 1, skeletal muscle	ACTA|ASMA|CFTD|CFTD1|CFTDM|MPFD|NEM1|NEM2|NEM3	42	49	1.12667	0.172059	0.620645	0.207157
ACTA2	59	actin, alpha 2, smooth muscle, aorta	AAT6|ACTSA|MYMY5	42	49	1.12667	0.172059	0.620645	0.207157
ACTC1	70	actin, alpha, cardiac muscle 1	ACTC|ASD5|CMD1R|CMH11|LVNC4	42	49	1.12667	0.172059	0.620645	0.207157
ACTG2	72	actin, gamma 2, smooth muscle, enteric	ACT|ACTA3|ACTE|ACTL3|ACTSG|VSCM	42	49	1.12667	0.172059	0.620645	0.207157
MRPS6	64968	mitochondrial ribosomal protein S6	C21orf101|MRP-S6|RPMS6|S6mt	7	5	0.781913	-0.35492	0.62453	0.204446
DYNC1H1	1778	dynein, cytoplasmic 1, heavy chain 1	DHC1|DHC1a|DNCH1|DNCL|DNECL|DYHC|Dnchc1|HL-3|SMALED1|p22	16	21	1.31196	0.391724	0.6273	0.202525
ACADSB	36	acyl-CoA dehydrogenase, short/branched chain	2-MEBCAD|ACAD7|SBCAD	1	2	1.13817	0.186713	0.628021	0.202026
CAPZA1	829	capping protein (actin filament) muscle Z-line, alpha 1	CAPPA1|CAPZ|CAZ1	1	2	1.13817	0.186713	0.628021	0.202026
CHCHD1	118487	coiled-coil-helix-coiled-coil-helix domain containing 1	C10orf34|C2360|MRP-S37	1	2	1.13817	0.186713	0.628021	0.202026
MRPL28	10573	mitochondrial ribosomal protein L28	MAAT1|p15	1	2	1.13817	0.186713	0.628021	0.202026
MRPL38	64978	mitochondrial ribosomal protein L38	HSPC262|L38MT|MRP-L3|MRP-L38|RPML3	1	2	1.13817	0.186713	0.628021	0.202026
MRPS30	10884	mitochondrial ribosomal protein S30	MRP-S30|PAP|PDCD9|S30mt	1	2	1.13817	0.186713	0.628021	0.202026
NDUFA8	4702	NADH dehydrogenase (ubiquinone) 1 alpha subcomplex, 8, 19kDa	CI-19KD|CI-PGIV|PGIV	1	2	1.13817	0.186713	0.628021	0.202026
NDUFB10	4716	NADH dehydrogenase (ubiquinone) 1 beta subcomplex, 10, 22kDa	PDSW	1	2	1.13817	0.186713	0.628021	0.202026
NDUFV1	4723	NADH dehydrogenase (ubiquinone) flavoprotein 1, 51kDa	CI-51K|CI51KD|UQOR1	1	2	1.13817	0.186713	0.628021	0.202026
PPIF	10105	peptidylprolyl isomerase F	CYP3|CyP-M|Cyp-D|CypD	1	2	1.13817	0.186713	0.628021	0.202026
RPS3A	6189	ribosomal protein S3A	FTE1|MFTL|S3A	1	2	1.13817	0.186713	0.628021	0.202026
TRMT10C	54931	tRNA methyltransferase 10 homolog C (S. cerevisiae)	HNYA|MRPP1|RG9MTD1	1	2	1.13817	0.186713	0.628021	0.202026
YARS2	51067	tyrosyl-tRNA synthetase 2, mitochondrial	CGI-04|MLASA2|MT-TYRRS|TYRRS	1	2	1.13817	0.186713	0.628021	0.202026
ATP5B	506	ATP synthase, H+ transporting, mitochondrial F1 complex, beta polypeptide	ATPMB|ATPSB|HEL-S-271	70	84	1.11551	0.157705	0.631299	0.199765
SPTBN1	6711	spectrin, beta, non-erythrocytic 1	ELF|HEL102|SPTB2|betaSpII	23	30	1.15264	0.204946	0.632175	0.199163
GADD45GIP1	90480	growth arrest and DNA-damage-inducible, gamma interacting protein 1	CKBBP2|CKbetaBP2|CRIF1|MRP-L59|PLINP|PLINP-1|PRG6|Plinp1	6	4	0.777535	-0.36302	0.633025	0.198579
ALDH18A1	5832	aldehyde dehydrogenase 18 family, member A1	ARCL3A|GSAS|P5CS|PYCS	5	4	0.879137	-0.18584	0.63359	0.198192
SDHA	6389	succinate dehydrogenase complex, subunit A, flavoprotein (Fp)	CMD1GG|FP|PGL5|SDH1|SDH2|SDHF	5	4	0.879137	-0.18584	0.63359	0.198192
AP2B1	163	adaptor-related protein complex 2, beta 1 subunit	ADTB2|AP105B|AP2-BETA|CLAPB1	4	5	1.41169	0.49742	0.634101	0.197842
KRT75	9119	keratin 75, type II	K6HF|KB18|PFB	228	206	0.894224	-0.161292	0.637943	0.195218
ARG1	383	arginase 1	-	17	20	2.23285	1.15889	0.638074	0.195129
HADHA	3030	hydroxyacyl-CoA dehydrogenase/3-ketoacyl-CoA thiolase/enoyl-CoA hydratase (trifunctional protein), alpha subunit	ECHA|GBP|HADH|LCEH|LCHAD|MTPA|TP-ALPHA	42	34	0.935065	-0.0968611	0.6392	0.194363
CTSD	1509	cathepsin D	CLN10|CPSD|HEL-S-130P	7	5	0.859822	-0.217891	0.643436	0.191495
HNRNPCL1	343069	heterogeneous nuclear ribonucleoprotein C-like 1	HNRPCL1	9	13	1.38686	0.47182	0.644779	0.190589
HNRNPCL3	649330	heterogeneous nuclear ribonucleoprotein C-like 3	HNRNPCL2	9	13	1.38686	0.47182	0.644779	0.190589
HNRNPCL4	101060301	heterogeneous nuclear ribonucleoprotein C-like 4	-	9	13	1.38686	0.47182	0.644779	0.190589
H2AFJ	55766	H2A histone family, member J	H2AJ	2	3	1.2363	0.306031	0.64786	0.188519
HIST1H2AB	8335	histone cluster 1, H2ab	H2A/m|H2AFM	2	3	1.2363	0.306031	0.64786	0.188519
HIST1H2AC	8334	histone cluster 1, H2ac	H2A/l|H2AFL|dJ221C16.4	2	3	1.2363	0.306031	0.64786	0.188519
HIST1H2AD	3013	histone cluster 1, H2ad	H2A.3|H2A/g|H2AFG	2	3	1.2363	0.306031	0.64786	0.188519
HIST1H2AE	3012	histone cluster 1, H2ae	H2A.1|H2A.2|H2A/a|H2AFA	2	3	1.2363	0.306031	0.64786	0.188519
HIST1H2AG	8969	histone cluster 1, H2ag	H2A.1b|H2A/p|H2AFP|H2AG|pH2A/f	2	3	1.2363	0.306031	0.64786	0.188519
HIST1H2AH	85235	histone cluster 1, H2ah	H2A/S|H2AFALii|H2AH|dJ86C11.1	2	3	1.2363	0.306031	0.64786	0.188519
HIST1H2AI	8329	histone cluster 1, H2ai	H2A/c|H2AFC	2	3	1.2363	0.306031	0.64786	0.188519
HIST1H2AJ	8331	histone cluster 1, H2aj	H2A/E|H2AFE|dJ160A22.4	2	3	1.2363	0.306031	0.64786	0.188519
HIST1H2AK	8330	histone cluster 1, H2ak	H2A/d|H2AFD	2	3	1.2363	0.306031	0.64786	0.188519
HIST1H2AL	8332	histone cluster 1, H2al	H2A.i|H2A/i|H2AFI|dJ193B12.9	2	3	1.2363	0.306031	0.64786	0.188519
HIST1H2AM	8336	histone cluster 1, H2am	H2A.1|H2A/n|H2AFN|dJ193B12.1	2	3	1.2363	0.306031	0.64786	0.188519
HIST2H2AA3	8337	histone cluster 2, H2aa3	H2A|H2A.2|H2A/O|H2A/q|H2AFO|H2a-615|HIST2H2AA	2	3	1.2363	0.306031	0.64786	0.188519
HIST2H2AA4	723790	histone cluster 2, H2aa4	H2A/R	2	3	1.2363	0.306031	0.64786	0.188519
HIST2H2AC	8338	histone cluster 2, H2ac	H2A|H2A-GL101|H2A/q|H2AFQ	2	3	1.2363	0.306031	0.64786	0.188519
HIST3H2A	92815	histone cluster 3, H2a	-	2	3	1.2363	0.306031	0.64786	0.188519
PGAM5	192111	phosphoglycerate mutase family member 5	BXLBV68	12	10	0.768224	-0.3804	0.647918	0.18848
CYCS	54205	cytochrome c, somatic	CYC|HCS|THC4	2	4	1.5575	0.639234	0.650675	0.186636
PKP1	5317	plakophilin 1	B6P	19	24	1.28368	0.360282	0.65093	0.186466
RPL12	6136	ribosomal protein L12	L12	5	3	0.751733	-0.411708	0.654892	0.18383
ALDOC	230	aldolase C, fructose-bisphosphate	ALDC	2	1	0.911955	-0.132965	0.655267	0.183582
FLG	2312	filaggrin	ATOD2	2	1	0.911955	-0.132965	0.655267	0.183582
HADHB	3032	hydroxyacyl-CoA dehydrogenase/3-ketoacyl-CoA thiolase/enoyl-CoA hydratase (trifunctional protein), beta subunit	ECHB|MSTP029|MTPB|TP-BETA	25	20	0.82717	-0.273744	0.655864	0.183187
TRIM28	10155	tripartite motif containing 28	KAP1|PPP1R157|RNF96|TF1B|TIF1B	4	3	1.37767	0.462229	0.65863	0.181359
HSP90AB1	3326	heat shock protein 90kDa alpha (cytosolic), class B member 1	D6S182|HSP84|HSP90B|HSPC2|HSPCB	45	51	1.09132	0.126076	0.662213	0.179003
FLG2	388698	filaggrin family member 2	IFPS	63	58	0.91459	-0.128803	0.66431	0.177629
CAT	847	catalase	-	14	19	1.62823	0.703306	0.667169	0.175764
HBE1	3046	hemoglobin, epsilon 1	HBE	4	3	1.04522	0.0638082	0.669577	0.1742
HBG1	3047	hemoglobin, gamma A	HBG-T2|HBGA|HBGR|HSGGL1|PRO2979	4	3	1.04522	0.0638082	0.669577	0.1742
HBG2	3048	hemoglobin, gamma G	HBG-T1|TNCY	4	3	1.04522	0.0638082	0.669577	0.1742
BRI3BP	140707	BRI3 binding protein	BNAS1|HCCR-1|HCCR-2|HCCRBP-1|KG19	2	3	1.1383	0.18688	0.670597	0.173539
COX7A2	1347	cytochrome c oxidase subunit VIIa polypeptide 2 (liver)	COX7AL|COX7AL1|COXVIIAL|COXVIIa-L|VIIAL	2	3	1.1383	0.18688	0.670597	0.173539
EIF3I	8668	eukaryotic translation initiation factor 3, subunit I	EIF3S2|PRO2242|TRIP-1|TRIP1|eIF3-beta|eIF3-p36	2	3	1.1383	0.18688	0.670597	0.173539
EMD	2010	emerin	EDMD|LEMD5|STA	2	3	1.1383	0.18688	0.670597	0.173539
TOMM5	401505	translocase of outer mitochondrial membrane 5 homolog (yeast)	C9orf105|Tom5|bA613M10.3	2	3	1.1383	0.18688	0.670597	0.173539
SBSN	374897	suprabasin	UNQ698	8	8	1.58622	0.665596	0.677799	0.168899
KPNB1	3837	karyopherin (importin) beta 1	IMB1|IPO1|IPOB|Impnb|NTF97	8	12	1.15324	0.20569	0.67884	0.168233
P4HB	5034	prolyl 4-hydroxylase, beta polypeptide	DSI|ERBA2L|GIT|P4Hbeta|PDI|PDIA1|PHDB|PO4DB|PO4HB|PROHB	9	13	1.26094	0.334494	0.679121	0.168053
ERH	2079	enhancer of rudimentary homolog (Drosophila)	DROER	7	6	0.988741	-0.0163353	0.681972	0.166233
KIF11	3832	kinesin family member 11	EG5|HKSP|KNSL1|MCLMR|TRIP5	10	13	1.29187	0.369459	0.68232	0.166012
ALDH1B1	219	aldehyde dehydrogenase 1 family, member B1	ALDH5|ALDHX	5	4	0.902175	-0.14852	0.68421	0.164811
C14orf166	51637	chromosome 14 open reading frame 166	CGI-99|CGI99|CLE|CLE7|LCRP369|RLLM1	5	4	0.902175	-0.14852	0.68421	0.164811
KRT33B	3884	keratin 33B, type I	HA3II|Ha-3II|K33B|KRTHA3A|KRTHA3B|hHa3-II	24	29	1.11889	0.162072	0.685483	0.164003
KRT79	338785	keratin 79, type II	K6L|KRT6L	192	172	0.891017	-0.166476	0.687929	0.162456
ATP1A2	477	ATPase, Na+/K+ transporting, alpha 2 polypeptide	FHM2|MHP2	27	25	0.927099	-0.109204	0.688808	0.161902
DSP	1832	desmoplakin	DCWHKTA|DP|DPI|DPII	148	158	1.30195	0.380673	0.692642	0.159491
LGALS7	3963	lectin, galactoside-binding, soluble, 7	GAL7|LGALS7A	5	4	1.22904	0.297532	0.693947	0.158674
LGALS7B	653499	lectin, galactoside-binding, soluble, 7B	GAL7|Gal-7|HKL-14|LGALS7|PI7	5	4	1.22904	0.297532	0.693947	0.158674
RPS28	6234	ribosomal protein S28	S28	4	5	1.22995	0.298596	0.693952	0.158671
KRT18	3875	keratin 18, type I	CYK18|K18	38	36	0.947603	-0.0776453	0.69412	0.158565
SYNCRIP	10492	synaptotagmin binding, cytoplasmic RNA interacting protein	GRY-RBP|GRYRBP|HNRNPQ|HNRPQ1|NSAP1|PP68|hnRNP-Q	6	5	0.968367	-0.0463746	0.698774	0.155663
KHDRBS1	10657	KH domain containing, RNA binding, signal transduction associated 1	Sam68|p62|p68	6	5	0.901745	-0.149208	0.701667	0.153869
CLPP	8192	caseinolytic mitochondrial matrix peptidase proteolytic subunit	DFNB81|PRLTS3	8	10	1.12307	0.167442	0.703676	0.152627
ATP5A1	498	ATP synthase, H+ transporting, mitochondrial F1 complex, alpha subunit 1, cardiac muscle	ATP5A|ATP5AL2|ATPM|COXPD22|HEL-S-123m|MC5DN4|MOM2|OMR|ORM|hATP1	51	60	1.06763	0.0944158	0.706166	0.151093
ACTR1A	10121	ARP1 actin-related protein 1 homolog A, centractin alpha (yeast)	ARP1|CTRN1	3	2	0.89045	-0.167393	0.706536	0.150866
MALSU1	115416	mitochondrial assembly of ribosomal large subunit 1	C7orf30|mtRsfA	3	2	0.89045	-0.167393	0.706536	0.150866
MIA3	375056	melanoma inhibitory activity family, member 3	ARNT|D320|TANGO|TANGO1|UNQ6077	3	2	0.89045	-0.167393	0.706536	0.150866
YBX2	51087	Y box binding protein 2	CONTRIN|CSDA3|DBPC|MSY2	3	2	0.89045	-0.167393	0.706536	0.150866
YBX3	8531	Y box binding protein 3	CSDA|CSDA1|DBPA|ZONAB	3	2	0.89045	-0.167393	0.706536	0.150866
HSPE1	3336	heat shock 10kDa protein 1	CPN10|EPF|GROES|HSP10	8	8	0.970489	-0.0432165	0.707704	0.150149
MTHFD1	4522	methylenetetrahydrofolate dehydrogenase (NADP+ dependent) 1, methenyltetrahydrofolate cyclohydrolase, formyltetrahydrofolate synthetase	MTHFC|MTHFD	9	13	1.31865	0.399063	0.708309	0.149777
TUBB4B	10383	tubulin, beta 4B class IVb	Beta2|TUBB2|TUBB2C	77	75	0.976624	-0.0341244	0.708347	0.149754
KRT35	3886	keratin 35, type I	HA5|Ha-5|KRTHA5|hHa5	24	21	0.860177	-0.217295	0.708768	0.149496
ENO3	2027	enolase 3 (beta, muscle)	GSD13|MSE	6	7	1.08452	0.117059	0.709034	0.149333
DNAJC15	29103	DnaJ (Hsp40) homolog, subfamily C, member 15	DNAJD1|HSD18|MCJ	1	2	1.36361	0.44743	0.711232	0.147989
ATP5C1	509	ATP synthase, H+ transporting, mitochondrial F1 complex, gamma polypeptide 1	ATP5C|ATP5CL1	3	4	1.08867	0.122565	0.711264	0.147969
EIF3B	8662	eukaryotic translation initiation factor 3, subunit B	EIF3-ETA|EIF3-P110|EIF3-P116|EIF3S9|PRT1	3	4	1.08867	0.122565	0.711264	0.147969
SSBP1	6742	single-stranded DNA binding protein 1, mitochondrial	Mt-SSB|SOSS-B1|SSBP|mtSSB	18	17	1.02819	0.0401033	0.711626	0.147748
HNRNPCL2	440563	heterogeneous nuclear ribonucleoprotein C-like 2	HNRNPCP5	9	12	1.34321	0.425689	0.716536	0.144762
FH	2271	fumarate hydratase	HLRCC|LRCC|MCL|MCUL1	2	1	1.00472	0.00678755	0.717877	0.14395
HSPA5	3309	heat shock 70kDa protein 5 (glucose-regulated protein, 78kDa)	BIP|GRP78|HEL-S-89n|MIF2	72	77	1.05285	0.074297	0.718405	0.143631
DLD	1738	dihydrolipoamide dehydrogenase	DLDD|DLDH|E3|GCSL|LAD|PHE3	10	13	1.12673	0.172145	0.718539	0.14355
TAGLN2	8407	transgelin 2	HA1756	3	2	0.900418	-0.151334	0.71935	0.14306
SSR4	6748	signal sequence receptor, delta	CDG1Y|TRAPD	1	1	1.13347	0.180751	0.720309	0.142481
GRSF1	2926	G-rich RNA sequence binding factor 1	-	4	5	1.22908	0.297575	0.720648	0.142277
MRPL48	51642	mitochondrial ribosomal protein L48	CGI-118|HSPC290|L48MT|MRP-L48	5	5	0.992059	-0.0115022	0.722552	0.141131
MYH8	4626	myosin, heavy chain 8, skeletal muscle, perinatal	MyHC-peri|MyHC-pn|gtMHC-F	6	4	0.887523	-0.172144	0.724322	0.140068
TXNDC5	81567	thioredoxin domain containing 5 (endoplasmic reticulum)	ENDOPDI|ERP46|HCC-2|PDIA15|STRF8|UNQ364	2	3	1.09406	0.129692	0.726042	0.139038
EEF1G	1937	eukaryotic translation elongation factor 1 gamma	EF1G|GIG35	7	7	1.07743	0.107597	0.727888	0.137935
CD2AP	23607	CD2-associated protein	CMS	2	3	1.08854	0.122392	0.72902	0.137261
MRPL4	51073	mitochondrial ribosomal protein L4	CGI-28|L4mt	2	3	1.08854	0.122392	0.72902	0.137261
POLRMT	5442	polymerase (RNA) mitochondrial (DNA directed)	APOLMT|MTRNAP|MTRPOL|h-mtRPOL	2	3	1.08854	0.122392	0.72902	0.137261
RPS25	6230	ribosomal protein S25	S25	2	3	1.08854	0.122392	0.72902	0.137261
CHCHD2	51142	coiled-coil-helix-coiled-coil-helix domain containing 2	C7orf17	4	4	0.956668	-0.0639093	0.729558	0.13694
EIF3F	8665	eukaryotic translation initiation factor 3, subunit F	EIF3S5|eIF3-p47	4	4	0.956668	-0.0639093	0.729558	0.13694
DSG1	1828	desmoglein 1	CDHF4|DG1|DSG|EPKHE|EPKHIA|PPKS1|SPPK1	112	117	1.19678	0.259162	0.729941	0.136712
MRPL12	6182	mitochondrial ribosomal protein L12	5c5-2|L12mt|MRP-L31/34|MRPL7|MRPL7/L12|RPML12	7	7	1.01453	0.0208058	0.733521	0.134587
TUBB6	84617	tubulin, beta 6 class V	HsT1601|TUBB-5	18	22	1.36933	0.453468	0.7346	0.133949
HNRNPU	3192	heterogeneous nuclear ribonucleoprotein U (scaffold attachment factor A)	HNRPU|SAF-A|U21.1|hnRNP U	21	18	0.791132	-0.338009	0.73865	0.131562
ATP2A3	489	ATPase, Ca++ transporting, ubiquitous	SERCA3	1	2	1.26561	0.339828	0.739416	0.131111
CYB5B	80777	cytochrome b5 type B (outer mitochondrial membrane)	CYB5-M|CYPB5M|OMB5	1	2	1.26561	0.339828	0.739416	0.131111
CYB5R3	1727	cytochrome b5 reductase 3	B5R|DIA1	1	2	1.26561	0.339828	0.739416	0.131111
HRSP12	10247	heat-responsive protein 12	P14.5|PSP|UK114	1	2	1.26561	0.339828	0.739416	0.131111
KATNAL2	83473	katanin p60 subunit A-like 2	-	1	2	1.26561	0.339828	0.739416	0.131111
ME2	4200	malic enzyme 2, NAD(+)-dependent, mitochondrial	ODS1	1	2	1.26561	0.339828	0.739416	0.131111
RPS21	6227	ribosomal protein S21	HLDF|S21	1	2	1.26561	0.339828	0.739416	0.131111
SLC3A2	6520	solute carrier family 3 (amino acid transporter heavy chain), member 2	4F2|4F2HC|4T2HC|CD98|CD98HC|MDU1|NACAE	1	2	1.26561	0.339828	0.739416	0.131111
TMED10	10972	transmembrane emp24-like trafficking protein 10 (yeast)	P24(DELTA)|S31I125|S31III125|TMP21|Tmp-21-I|p23	1	2	1.26561	0.339828	0.739416	0.131111
WIBG	84305	within bgcn homolog (Drosophila)	PYM	1	2	1.26561	0.339828	0.739416	0.131111
NEFH	4744	neurofilament, heavy polypeptide	NFH	15	16	1.11541	0.157576	0.747167	0.126583
LRPPRC	10128	leucine-rich pentatricopeptide repeat containing	CLONE-23970|GP130|LRP130|LSFC	507	472	1.00243	0.00350223	0.750075	0.124895
PGK1	5230	phosphoglycerate kinase 1	HEL-S-68p|MIG10|PGKA	1	2	1.11464	0.156581	0.751417	0.124119
ATP5D	513	ATP synthase, H+ transporting, mitochondrial F1 complex, delta subunit	-	5	5	0.956347	-0.0643944	0.751639	0.123991
MRPS2	51116	mitochondrial ribosomal protein S2	CGI-91|MRP-S2|S2mt	5	4	0.835978	-0.258463	0.754539	0.122318
AK3	50808	adenylate kinase 3	AK3L1|AK6|AKL3L|AKL3L1|FIX	1	1	1.12528	0.170288	0.754754	0.122195
ATP5I	521	ATP synthase, H+ transporting, mitochondrial Fo complex, subunit E	ATP5K	1	1	1.12528	0.170288	0.754754	0.122195
CALU	813	calumenin	-	1	1	1.12528	0.170288	0.754754	0.122195
COX17	10063	COX17 cytochrome c oxidase copper chaperone	-	1	1	1.12528	0.170288	0.754754	0.122195
CTSB	1508	cathepsin B	APPS|CPSB	1	1	1.12528	0.170288	0.754754	0.122195
KTN1	3895	kinectin 1 (kinesin receptor)	CG1|KNT|MU-RMS-40.19	1	1	1.12528	0.170288	0.754754	0.122195
MCM3	4172	minichromosome maintenance complex component 3	HCC5|P1-MCM3|P1.h|RLFB	1	1	1.12528	0.170288	0.754754	0.122195
MRPL50	54534	mitochondrial ribosomal protein L50	MRP-L50	1	1	1.12528	0.170288	0.754754	0.122195
MYL6	4637	myosin, light chain 6, alkali, smooth muscle and non-muscle	ESMLC|LC17|LC17-GI|LC17-NM|LC17A|LC17B|MLC-3|MLC1SM|MLC3NM|MLC3SM	1	1	1.12528	0.170288	0.754754	0.122195
MYL6B	140465	myosin, light chain 6B, alkali, smooth muscle and non-muscle	MLC1SA	1	1	1.12528	0.170288	0.754754	0.122195
PDGFRL	5157	platelet-derived growth factor receptor-like	PDGRL|PRLTS	1	1	1.12528	0.170288	0.754754	0.122195
PDHA2	5161	pyruvate dehydrogenase (lipoamide) alpha 2	PDHAL	1	1	1.12528	0.170288	0.754754	0.122195
PFKFB3	5209	6-phosphofructo-2-kinase/fructose-2,6-biphosphatase 3	IPFK2|PFK2	1	1	1.12528	0.170288	0.754754	0.122195
PPP2R1A	5518	protein phosphatase 2, regulatory subunit A, alpha	PP2A-Aalpha|PP2AAALPHA|PR65A	1	1	1.12528	0.170288	0.754754	0.122195
ETFB	2109	electron-transfer-flavoprotein, beta polypeptide	FP585|MADD	6	5	0.916395	-0.125958	0.762114	0.11798
KRT2	3849	keratin 2, type II	CK-2e|K2e|KRT2A|KRT2E|KRTE	1076	999	0.917063	-0.124907	0.762865	0.117552
KRT31	3881	keratin 31, type I	HA1|Ha-1|KRTHA1|hHa1	27	32	1.03985	0.056379	0.763359	0.117271
KRT36	8689	keratin 36, type I	HA6|KRTHA6|hHa6	26	23	0.848657	-0.236746	0.766669	0.115392
HSPA9	3313	heat shock 70kDa protein 9 (mortalin)	CRP40|CSA|GRP-75|GRP75|HEL-S-124m|HSPA9B|MOT|MOT2|MTHSP75|PBP74	68	77	1.05174	0.0727825	0.767613	0.114857
EEF1D	1936	eukaryotic translation elongation factor 1 delta (guanine nucleotide exchange protein)	EF-1D|EF1D|FP1047	4	4	1.15866	0.212452	0.774343	0.111066
DDX3X	1654	DEAD (Asp-Glu-Ala-Asp) box helicase 3, X-linked	CAP-Rf|DBX|DDX14|DDX3|HLP2	14	12	0.908959	-0.137713	0.774711	0.11086
ECHS1	1892	enoyl CoA hydratase, short chain, 1, mitochondrial	SCEH	9	11	1.07649	0.106331	0.774999	0.110699
MTHFD1L	25902	methylenetetrahydrofolate dehydrogenase (NADP+ dependent) 1-like	FTHFSDC1|MTC1THFS|dJ292B18.2	15	18	1.10509	0.144163	0.775953	0.110165
ATP13A1	57130	ATPase type 13A1	ATP13A|CGI-152	2	2	1.12572	0.170849	0.777461	0.109322
SERPINH1	871	serpin peptidase inhibitor, clade H (heat shock protein 47), member 1, (collagen binding protein 1)	AsTP3|CBP1|CBP2|HSP47|OI10|PIG14|PPROM|RA-A47|SERPINH2|gp46	3	2	0.891725	-0.165329	0.780463	0.107648
SND1	27044	staphylococcal nuclease and tudor domain containing 1	TDRD11|p100	3	2	0.891725	-0.165329	0.780463	0.107648
SRPRB	58477	signal recognition particle receptor, B subunit	APMCF1	3	3	1.10592	0.145244	0.787888	0.103535
EIF4B	1975	eukaryotic translation initiation factor 4B	EIF-4B|PRO1843	8	7	0.901619	-0.14941	0.78978	0.102494
NDUFS3	4722	NADH dehydrogenase (ubiquinone) Fe-S protein 3, 30kDa (NADH-coenzyme Q reductase)	CI-30	8	9	1.21454	0.280412	0.79008	0.102329
KRT222	125113	keratin 222, type II	KA21|KRT222P	28	27	0.945465	-0.0809042	0.790495	0.102101
RPN2	6185	ribophorin II	RIBIIR|RPN-II|RPNII|SWP1	2	2	0.997976	-0.00292236	0.79332	0.100551
STRAP	11171	serine/threonine kinase receptor associated protein	MAWD|PT-WD|UNRIP	2	2	0.997976	-0.00292236	0.79332	0.100551
ALDH2	217	aldehyde dehydrogenase 2 family (mitochondrial)	ALDH-E2|ALDHI|ALDM	9	8	0.974453	-0.0373348	0.795422	0.0994024
HSP90B1	7184	heat shock protein 90kDa beta (Grp94), member 1	ECGP|GP96|GRP94|HEL-S-125m|HEL35|TRA1	32	36	1.03007	0.0427406	0.799265	0.0973095
LDHA	3939	lactate dehydrogenase A	GSD11|HEL-S-133P|LDH1|LDHM|PIG19	4	6	1.56351	0.644787	0.80027	0.0967632
HIST1H1A	3024	histone cluster 1, H1a	H1.1|H1A|H1F1|HIST1	5	6	1.38981	0.474884	0.802422	0.0955974
HIST1H1T	3010	histone cluster 1, H1t	H1.6|H1FT|H1t|dJ221C16.2	5	6	1.38981	0.474884	0.802422	0.0955974
HSPB1	3315	heat shock 27kDa protein 1	CMT2F|HEL-S-102|HMN2B|HS.76067|HSP27|HSP28|Hsp25|SRP27	30	33	1.20327	0.266963	0.804796	0.0943143
FLNA	2316	filamin A, alpha	ABP-280|ABPX|CSBS|CVD1|FLN|FLN-A|FLN1|FMD|MNS|NHBP|OPD|OPD1|OPD2|XLVD|XMVD	23	29	1.15269	0.205001	0.805151	0.0941226
LGALS3BP	3959	lectin, galactoside-binding, soluble, 3 binding protein	90K|BTBD17B|CyCAP|M2BP|MAC-2-BP|TANGO10B|gp90	3	3	0.956537	-0.0641073	0.812901	0.0899624
MCAT	27349	malonyl CoA:ACP acyltransferase (mitochondrial)	FASN2C|MCT|MT|NET62|fabD	3	3	0.956537	-0.0641073	0.812901	0.0899624
ETFA	2108	electron-transfer-flavoprotein, alpha polypeptide	EMA|GA2|MADD	9	8	0.925555	-0.111609	0.816345	0.088126
GOT2	2806	glutamic-oxaloacetic transaminase 2, mitochondrial	KAT4|KATIV|mitAAT	15	17	1.04702	0.0662958	0.816911	0.0878254
KRT9	3857	keratin 9, type I	CK-9|EPPK|K9	844	896	1.04545	0.06412	0.81809	0.0871991
ALYREF	10189	Aly/REF export factor	ALY|ALY/REF|BEF|REF|THOC4	7	6	0.917536	-0.124163	0.82088	0.0857201
PRKCSH	5589	protein kinase C substrate 80K-H	AGE-R2|G19P1|PCLD|PKCSH|PLD1	7	9	1.07726	0.107368	0.821056	0.0856274
PDHA1	5160	pyruvate dehydrogenase (lipoamide) alpha 1	PDHA|PDHAD|PDHCE1A|PHE1A	3	4	1.13798	0.186472	0.82194	0.0851601
SHMT1	6470	serine hydroxymethyltransferase 1 (soluble)	CSHMT|SHMT	3	4	1.13798	0.186472	0.82194	0.0851601
ALDOA	226	aldolase A, fructose-bisphosphate	ALDA|GSD12|HEL-S-87p	21	24	1.09277	0.127993	0.823647	0.0842589
MRPL49	740	mitochondrial ribosomal protein L49	C11orf4|L49mt|MRP-L49|NOF|NOF1	4	5	1.39024	0.475331	0.824257	0.0839371
ACADM	34	acyl-CoA dehydrogenase, C-4 to C-12 straight chain	ACAD1|MCAD|MCADH	2	2	1.16856	0.22473	0.824338	0.0838947
ENO2	2026	enolase 2 (gamma, neuronal)	HEL-S-279|NSE	2	2	1.16856	0.22473	0.824338	0.0838947
RAB5C	5878	RAB5C, member RAS oncogene family	L1880|RAB5CL|RAB5L|RABL	6	7	1.04531	0.0639267	0.826135	0.0829487
RPN1	6184	ribophorin I	OST1|RBPH1	12	12	0.964518	-0.0521201	0.82635	0.082836
MRPL53	116540	mitochondrial ribosomal protein L53	L53MT	3	3	1.04125	0.0583181	0.827676	0.0821396
KRT80	144501	keratin 80, type II	KB20	61	62	1.04725	0.0666018	0.834578	0.0785329
PABPN1	8106	poly(A) binding protein, nuclear 1	OPMD|PAB2|PABII|PABP-2|PABP2	4	4	0.984399	-0.022685	0.834937	0.0783463
HSPE1-MOB4	100529241	HSPE1-MOB4 readthrough	HSPE1-PHOCN	3	3	0.976155	-0.0348178	0.84206	0.0746567
KRT5	3852	keratin 5, type II	CK5|DDD|DDD1|EBS2|K5|KRT5A	613	587	0.955502	-0.0656691	0.850499	0.0703261
HSPA2	3306	heat shock 70kDa protein 2	HSP70-2|HSP70-3	9	11	1.1557	0.208761	0.850596	0.0702768
TUBB	203068	tubulin, beta class I	CDCBM6|M40|OK/SW-cl.56|TUBB1|TUBB5	88	89	0.989895	-0.0146521	0.851332	0.0699012
LRRC59	55379	leucine rich repeat containing 59	PRO1855|p34	3	2	1.04274	0.0603795	0.85206	0.0695297
VIM	7431	vimentin	CTRCT30|HEL113	12	16	1.48407	0.569557	0.857587	0.0667218
RBM14	10432	RNA binding motif protein 14	COAA|PSP2|SIP|SYTIP1|TMEM137	7	6	0.936337	-0.0949005	0.860202	0.0653995
GRPEL1	80273	GrpE-like 1, mitochondrial (E. coli)	HMGE	2	3	1.15974	0.213803	0.861751	0.0646183
ATP5L	10632	ATP synthase, H+ transporting, mitochondrial Fo complex, subunit G	ATP5JG	2	3	1.26528	0.339462	0.864285	0.063343
SERPINA12	145264	serpin peptidase inhibitor, clade A (alpha-1 antiproteinase, antitrypsin), member 12	OL-64	1	1	1.05215	0.0733357	0.864651	0.0631589
KRT78	196374	keratin 78, type II	CK-78|K5B|K78|Kb40	89	86	1.10111	0.138958	0.867873	0.0615438
DAD1	1603	defender against cell death 1	OST2	1	2	1.4175	0.50335	0.869238	0.0608614
NDUFV2	4729	NADH dehydrogenase (ubiquinone) flavoprotein 2, 24kDa	CI-24k	1	2	1.4175	0.50335	0.869238	0.0608614
CLCC1	23155	chloride channel CLIC-like 1	MCLC	3	3	0.948346	-0.0765138	0.870659	0.0601521
EMC2	9694	ER membrane protein complex subunit 2	KIAA0103|TTC35	3	3	0.948346	-0.0765138	0.870659	0.0601521
GLS	2744	glutaminase	AAD20|GAC|GAM|GLS1|KGA	3	3	0.948346	-0.0765138	0.870659	0.0601521
MRPL19	9801	mitochondrial ribosomal protein L19	L19mt|MRP-L15|MRP-L19|MRPL15|RLX1|RPML15	5	4	0.917726	-0.123864	0.871017	0.0599733
SCO1	6341	SCO1 cytochrome c oxidase assembly protein	SCOD1	2	2	1.11677	0.159332	0.875627	0.0576808
TUBB4A	10382	tubulin, beta 4A class IVa	DYT4|TUBB4|beta-5	50	55	1.12494	0.169846	0.877284	0.0568597
EEF1B2	1933	eukaryotic translation elongation factor 1 beta 2	EEF1B|EEF1B1|EF1B	5	5	1.12859	0.174515	0.878687	0.0561656
HNRNPR	10236	heterogeneous nuclear ribonucleoprotein R	HNRPR|hnRNP-R	9	8	0.890204	-0.167793	0.879504	0.0557621
MRPS28	28957	mitochondrial ribosomal protein S28	HSPC007|MRP-S28|MRP-S35|MRPS35	15	16	1.09984	0.137289	0.880607	0.055218
CS	1431	citrate synthase	-	11	12	1.0446	0.0629501	0.880686	0.0551787
LTBP3	4054	latent transforming growth factor beta binding protein 3	LTBP-3|LTBP2|STHAG6|pp6425	2	3	1.12296	0.167312	0.882578	0.0542467
ECI2	10455	enoyl-CoA delta isomerase 2	ACBD2|DRS-1|DRS1|HCA88|PECI|dJ1013A10.3	3	3	1.14336	0.193276	0.884276	0.053412
MRPL11	65003	mitochondrial ribosomal protein L11	CGI-113|L11MT|MRP-L11	3	3	1.14336	0.193276	0.884276	0.053412
GLUD2	2747	glutamate dehydrogenase 2	GDH2|GLUDP1	8	8	1.11339	0.154958	0.888666	0.0512616
POTEE	445582	POTE ankyrin domain family, member E	A26C1|A26C1A|CT104.2|POTE-2|POTE2|POTE2gamma	27	28	1.0197	0.0281477	0.88977	0.0507221
POTEF	728378	POTE ankyrin domain family, member F	A26C1B|ACTB|POTE2alpha|POTEACTIN	27	28	1.0197	0.0281477	0.88977	0.0507221
POTEI	653269	POTE ankyrin domain family, member I	POTE2beta	27	28	1.0197	0.0281477	0.88977	0.0507221
POTEJ	653781	POTE ankyrin domain family, member J	POTE2beta	27	28	1.0197	0.0281477	0.88977	0.0507221
CALR	811	calreticulin	CRT|HEL-S-99n|RO|SSA|cC1qR	6	6	0.918354	-0.122877	0.897615	0.0469101
ATP2A2	488	ATPase, Ca++ transporting, cardiac muscle, slow twitch 2	ATP2B|DAR|DD|SERCA2	3	4	1.20302	0.266656	0.899059	0.0462119
SNRPA1	6627	small nuclear ribonucleoprotein polypeptide A'	Lea1	3	4	1.20302	0.266656	0.899059	0.0462119
ALDH5A1	7915	aldehyde dehydrogenase 5 family, member A1	SSADH|SSDH	1	1	0.974857	-0.0367373	0.899322	0.0460846
ERO1L	30001	ERO1-like (S. cerevisiae)	ERO1-L|ERO1-L-alpha|ERO1-alpha|ERO1A|ERO1LA	1	1	0.974857	-0.0367373	0.899322	0.0460846
HINT2	84681	histidine triad nucleotide binding protein 2	HIT-17	1	1	0.974857	-0.0367373	0.899322	0.0460846
IDH2	3418	isocitrate dehydrogenase 2 (NADP+), mitochondrial	D2HGA2|ICD-M|IDH|IDHM|IDP|IDPM|mNADP-IDH	1	1	0.974857	-0.0367373	0.899322	0.0460846
MAPRE1	22919	microtubule-associated protein, RP/EB family, member 1	EB1	1	1	0.974857	-0.0367373	0.899322	0.0460846
PNN	5411	pinin, desmosome associated protein	DRS|DRSP|SDK3|memA	1	1	0.974857	-0.0367373	0.899322	0.0460846
PRPF19	27339	pre-mRNA processing factor 19	NMP200|PRP19|PSO4|SNEV|UBOX4|hPSO4	1	1	0.974857	-0.0367373	0.899322	0.0460846
RTCB	51493	RNA 2',3'-cyclic phosphate and 5'-OH ligase	C22orf28|DJ149A16.6|FAAP|HSPC117	1	1	0.974857	-0.0367373	0.899322	0.0460846
TACC3	10460	transforming, acidic coiled-coil containing protein 3	ERIC-1|ERIC1	1	1	0.974857	-0.0367373	0.899322	0.0460846
UBE2N	7334	ubiquitin-conjugating enzyme E2N	HEL-S-71|UBC13|UBCHBEN; UBC13|UbcH-ben|UbcH13	1	1	0.974857	-0.0367373	0.899322	0.0460846
UBE2NL	389898	ubiquitin-conjugating enzyme E2N-like (gene/pseudogene)	Li174	1	1	0.974857	-0.0367373	0.899322	0.0460846
AHNAK	79026	AHNAK nucleoprotein	AHNAKRS	2	2	0.975717	-0.0354649	0.899719	0.0458931
CCT4	10575	chaperonin containing TCP1, subunit 4 (delta)	CCT-DELTA|Cctd|SRB	2	2	0.975717	-0.0354649	0.899719	0.0458931
DYNC1LI2	1783	dynein, cytoplasmic 1, light intermediate chain 2	DNCLI2|LIC2	2	2	0.975717	-0.0354649	0.899719	0.0458931
HIBADH	11112	3-hydroxyisobutyrate dehydrogenase	NS5ATP1	2	2	0.975717	-0.0354649	0.899719	0.0458931
IGF2BP3	10643	insulin-like growth factor 2 mRNA binding protein 3	CT98|IMP-3|IMP3|KOC|KOC1|VICKZ3	2	2	0.975717	-0.0354649	0.899719	0.0458931
PMPCB	9512	peptidase (mitochondrial processing) beta	Beta-MPP|MPP11|MPPB|MPPP52|P-52	2	2	0.975717	-0.0354649	0.899719	0.0458931
RAB11A	8766	RAB11A, member RAS oncogene family	YL8	2	2	0.975717	-0.0354649	0.899719	0.0458931
RAB11B	9230	RAB11B, member RAS oncogene family	H-YPT3	2	2	0.975717	-0.0354649	0.899719	0.0458931
RALYL	138046	RALY RNA binding protein-like	HNRPCL3	2	2	0.975717	-0.0354649	0.899719	0.0458931
SF3B4	10262	splicing factor 3b, subunit 4, 49kDa	AFD1|Hsh49|SAP49|SF3b49	2	2	0.975717	-0.0354649	0.899719	0.0458931
SPIN1	10927	spindlin 1	SPIN	2	2	0.975717	-0.0354649	0.899719	0.0458931
GLUD1	2746	glutamate dehydrogenase 1	GDH|GDH1|GLUD	9	9	1.12399	0.168636	0.900527	0.0455034
KRT1	3848	keratin 1, type II	CK1|EHK|EHK1|EPPK|K1|KRT1A|NEPPK	1353	1379	1.0099	0.0142153	0.901527	0.0450213
ALDOB	229	aldolase B, fructose-bisphosphate	ALDB|ALDO2	2	2	1.05228	0.0735157	0.901938	0.0448235
SLC25A11	8402	solute carrier family 25 (mitochondrial carrier; oxoglutarate carrier), member 11	OGC|SLC20A4	5	5	0.96474	-0.051788	0.903599	0.0440244
IGF2BP1	10642	insulin-like growth factor 2 mRNA binding protein 1	CRD-BP|CRDBP|IMP-1|IMP1|VICKZ1|ZBP1	6	6	1.03115	0.0442517	0.903609	0.0440196
ACTB	60	actin, beta	BRWS1|PS1TP5BP1	78	83	1.02818	0.0400866	0.903651	0.0439994
RPS10	6204	ribosomal protein S10	DBA9|S10	12	12	0.999719	-0.000405363	0.907825	0.0419977
ATP6	4508	ATP synthase F0 subunit 6	ATPase6|MTATP6	1	1	0.975586	-0.035659	0.909041	0.0414166
BAX	581	BCL2-associated X protein	BCL2L4	1	1	0.975586	-0.035659	0.909041	0.0414166
CCDC47	57003	coiled-coil domain containing 47	GK001|MSTP041	1	1	0.975586	-0.035659	0.909041	0.0414166
DTD1	92675	D-tyrosyl-tRNA deacylase 1	C20orf88|DUE-B|DUEB|HARS2|bA379J5.3|bA555E18.1|pqn-68	1	1	0.975586	-0.035659	0.909041	0.0414166
EMC7	56851	ER membrane protein complex subunit 7	C11orf3|C15orf24|HT022|ORF1-FL1	1	1	0.975586	-0.035659	0.909041	0.0414166
FASTKD3	79072	FAST kinase domains 3	-	1	1	0.975586	-0.035659	0.909041	0.0414166
FECH	2235	ferrochelatase	EPP|FCE	1	1	0.975586	-0.035659	0.909041	0.0414166
GBA	2629	glucosidase, beta, acid	GBA1|GCB|GLUC	1	1	0.975586	-0.035659	0.909041	0.0414166
LOC100996643	100996643	monofunctional C1-tetrahydrofolate synthase, mitochondrial-like	-	1	1	0.975586	-0.035659	0.909041	0.0414166
LOC101928195	101928195	monofunctional C1-tetrahydrofolate synthase, mitochondrial-like	-	1	1	0.975586	-0.035659	0.909041	0.0414166
LOC101929583	101929583	monofunctional C1-tetrahydrofolate synthase, mitochondrial-like	-	1	1	0.975586	-0.035659	0.909041	0.0414166
LOC102724580	102724580	monofunctional C1-tetrahydrofolate synthase, mitochondrial-like	-	1	1	0.975586	-0.035659	0.909041	0.0414166
LOC102724904	102724904	monofunctional C1-tetrahydrofolate synthase, mitochondrial-like	-	1	1	0.975586	-0.035659	0.909041	0.0414166
MMAB	326625	methylmalonic aciduria (cobalamin deficiency) cblB type	ATR|CFAP23|cblB|cob	1	1	0.975586	-0.035659	0.909041	0.0414166
MOGS	7841	mannosyl-oligosaccharide glucosidase	CDG2B|CWH41|DER7|GCS1	1	1	0.975586	-0.035659	0.909041	0.0414166
MRPL10	124995	mitochondrial ribosomal protein L10	L10MT|MRP-L10|MRP-L8|MRPL8|RPML8	1	1	0.975586	-0.035659	0.909041	0.0414166
MRPL3	11222	mitochondrial ribosomal protein L3	COXPD9|MRL3|RPML3	1	1	0.975586	-0.035659	0.909041	0.0414166
MRPL37	51253	mitochondrial ribosomal protein L37	L37mt|MRP-L2|MRP-L37|MRPL2|RPML2	1	1	0.975586	-0.035659	0.909041	0.0414166
MRPL54	116541	mitochondrial ribosomal protein L54	L54mt|MRP-L54	1	1	0.975586	-0.035659	0.909041	0.0414166
NDUFA13	51079	NADH dehydrogenase (ubiquinone) 1 alpha subcomplex, 13	B16.6|CDA016|CGI-39|GRIM-19|GRIM19	1	1	0.975586	-0.035659	0.909041	0.0414166
NFS1	9054	NFS1 cysteine desulfurase	HUSSY-08|IscS|NIFS	1	1	0.975586	-0.035659	0.909041	0.0414166
NGRN	51335	neugrin, neurite outgrowth associated	DSC92	1	1	0.975586	-0.035659	0.909041	0.0414166
PABPC5	140886	poly(A) binding protein, cytoplasmic 5	PABP5	1	1	0.975586	-0.035659	0.909041	0.0414166
POLR2H	5437	polymerase (RNA) II (DNA directed) polypeptide H	RPABC3|RPB17|RPB8	1	1	0.975586	-0.035659	0.909041	0.0414166
RPL23A	6147	ribosomal protein L23a	L23A|MDA20	1	1	0.975586	-0.035659	0.909041	0.0414166
RQCD1	9125	RCD1 required for cell differentiation1 homolog (S. pombe)	CNOT9|CT129|RCD-1|RCD1	1	1	0.975586	-0.035659	0.909041	0.0414166
SPTLC1	10558	serine palmitoyltransferase, long chain base subunit 1	HSAN1|HSN1|LBC1|LCB1|SPT1|SPTI	1	1	0.975586	-0.035659	0.909041	0.0414166
SUB1	10923	SUB1 homolog (S. cerevisiae)	P15|PC4|p14	1	1	0.975586	-0.035659	0.909041	0.0414166
UGGT2	55757	UDP-glucose glycoprotein glucosyltransferase 2	HUGT2|UGCGL2|UGT2	1	1	0.975586	-0.035659	0.909041	0.0414166
WBSCR16	81554	Williams-Beuren syndrome chromosome region 16	-	1	1	0.975586	-0.035659	0.909041	0.0414166
KRT8	3856	keratin 8, type II	CARD2|CK-8|CK8|CYK8|K2C8|K8|KO	153	157	1.00527	0.00757921	0.912386	0.0398213
OCIAD1	54940	OCIA domain containing 1	ASRIJ|OCIA|TPA018	6	6	1.17851	0.236961	0.917559	0.0373659
ACTN2	88	actinin, alpha 2	CMD1AA	1	1	1.06673	0.0931928	0.917923	0.0371937
ACTN3	89	actinin, alpha 3 (gene/pseudogene)	-	1	1	1.06673	0.0931928	0.917923	0.0371937
RBMXL3	139804	RNA binding motif protein, X-linked-like 3	CXorf55	1	1	1.06673	0.0931928	0.917923	0.0371937
SNRPF	6636	small nuclear ribonucleoprotein polypeptide F	SMF|Sm-F|snRNP-F	1	1	1.06673	0.0931928	0.917923	0.0371937
PDIA4	9601	protein disulfide isomerase family A, member 4	ERP70|ERP72|ERp-72	7	9	1.55751	0.639243	0.918256	0.0370362
PDK3	5165	pyruvate dehydrogenase kinase, isozyme 3	CMTX6|GS1-358P8.4	3	2	1.22366	0.291199	0.919017	0.0366764
KRT32	3882	keratin 32, type I	HA2|HKA2|KRTHA2|hHa2	26	27	0.955038	-0.0663693	0.919674	0.0363662
UQCRFS1	7386	ubiquinol-cytochrome c reductase, Rieske iron-sulfur polypeptide 1	RIP1|RIS1|RISP|UQCR5	4	4	0.921465	-0.117999	0.922811	0.0348873
RPS19	6223	ribosomal protein S19	DBA|DBA1|S19	6	6	0.984085	-0.0231451	0.923839	0.0344036
ANXA2	302	annexin A2	ANX2|ANX2L4|CAL1H|HEL-S-270|LIP2|LPC2|LPC2D|P36|PAP-IV	36	36	1.0734	0.102192	0.924956	0.033879
TUBB3	10381	tubulin, beta 3 class III	CDCBM|CDCBM1|CFEOM3|CFEOM3A|FEOM3|TUBB4|beta-4	66	71	1.08996	0.124271	0.933136	0.030055
PRDX3	10935	peroxiredoxin 3	AOP-1|AOP1|HBC189|MER5|PRO1748|SP-22|prx-III	11	12	1.0428	0.0604579	0.936186	0.0286379
PA2G4	5036	proliferation-associated 2G4, 38kDa	EBP1|HG4-1|p38-2G4	6	6	0.948581	-0.0761574	0.938185	0.0277115
ECI1	1632	enoyl-CoA delta isomerase 1	DCI	4	5	1.22562	0.293517	0.941244	0.0262978
HNRNPH3	3189	heterogeneous nuclear ribonucleoprotein H3 (2H9)	2H9|HNRPH3	4	4	0.97449	-0.0372803	0.941967	0.0259642
PRDX4	10549	peroxiredoxin 4	AOE37-2|AOE372|HEL-S-97n|PRX-4	7	8	1.08717	0.120579	0.943643	0.0251921
DAZAP1	26528	DAZ associated protein 1	-	4	4	0.976293	-0.0346137	0.945485	0.0243454
RBMXL1	494115	RNA binding motif protein, X-linked-like 1	RBM1	4	4	0.976293	-0.0346137	0.945485	0.0243454
SLC25A31	83447	solute carrier family 25 (mitochondrial carrier; adenine nucleotide translocator), member 31	AAC4|ANT4|SFEC35kDa	4	5	1.06872	0.0958875	0.945572	0.0243056
DCTN1	1639	dynactin 1	DAP-150|DP-150|P135	3	3	0.976615	-0.0341385	0.946521	0.0238698
SF1	7536	splicing factor 1	BBP|D11S636|MBBP|ZCCHC25|ZFM1|ZNF162	3	3	0.976615	-0.0341385	0.946521	0.0238698
HNRNPC	3183	heterogeneous nuclear ribonucleoprotein C (C1/C2)	C1|C2|HNRNP|HNRPC|SNRPC	32	31	0.875466	-0.191877	0.948373	0.0230207
SHMT2	6472	serine hydroxymethyltransferase 2 (mitochondrial)	GLYA|HEL-S-51e|SHMT	21	21	0.896712	-0.157283	0.949019	0.0227251
KRT37	8688	keratin 37, type I	HA7|K37|KRTHA7	24	23	0.924693	-0.112954	0.950083	0.0222386
KRT38	8687	keratin 38, type I	HA8|KRTHA8|hHa8	24	23	0.924693	-0.112954	0.950083	0.0222386
RBMX	27316	RNA binding motif protein, X-linked	HNRNPG|HNRPG|RBMXP1|RBMXRT|RNMX|hnRNP-G	6	6	0.976248	-0.0346805	0.953915	0.0204905
PDIA3	2923	protein disulfide isomerase family A, member 3	ER60|ERp57|ERp60|ERp61|GRP57|GRP58|HEL-S-269|HEL-S-93n|HsT17083|P58|PI-PLC	10	11	0.930929	-0.103257	0.959215	0.0180843
EEF2	1938	eukaryotic translation elongation factor 2	EEF-2|EF-2|EF2|SCA26	3	4	1.48338	0.568892	0.95977	0.0178328
MRPL1	65008	mitochondrial ribosomal protein L1	BM022|L1MT|MRP-L1	5	6	1.08373	0.116004	0.962743	0.0164896
NEFL	4747	neurofilament, light polypeptide	CMT1F|CMT2E|NF-L|NF68|NFL|PPP1R110	1	1	1.07286	0.101462	0.963039	0.016356
KRT4	3851	keratin 4, type II	CK-4|CK4|CYK4|K4|WSN1	80	81	0.984569	-0.0224364	0.963741	0.0160398
KRT13	3860	keratin 13, type I	CK13|K13|WSN2	141	140	0.979062	-0.0305283	0.965172	0.0153952
KRT7	3855	keratin 7, type II	CK7|K2C7|K7|SCL	59	59	0.948634	-0.0760765	0.967417	0.0143862
DIABLO	56616	diablo, IAP-binding mitochondrial protein	DFNA64|SMAC	15	16	1.00649	0.00932958	0.967961	0.0141423
SPTAN1	6709	spectrin, alpha, non-erythrocytic 1	EIEE5|NEAS|SPTA2	40	40	0.913866	-0.129946	0.968421	0.0139359
TOMM70A	9868	translocase of outer mitochondrial membrane 70 homolog A (S. cerevisiae)	-	5	5	0.975863	-0.0352495	0.969567	0.0134223
TUBB2A	7280	tubulin, beta 2A class IIa	CDCBM5|TUBB|TUBB2|dJ40E16.7	82	86	1.02836	0.0403388	0.972139	0.0122715
TUBB2B	347733	tubulin, beta 2B class IIb	PMGYSA|bA506K6.1	82	86	1.02836	0.0403388	0.972139	0.0122715
TUBA1A	7846	tubulin, alpha 1a	B-ALPHA-1|LIS3|TUBA3	49	50	1.00223	0.00321236	0.974233	0.0113374
TUBA1B	10376	tubulin, alpha 1b	K-ALPHA-1	49	50	1.00223	0.00321236	0.974233	0.0113374
TUBA1C	84790	tubulin, alpha 1c	TUBA6|bcm948	49	50	1.00223	0.00321236	0.974233	0.0113374
ACTG1	71	actin gamma 1	ACT|ACTG|BRWS2|DFNA20|DFNA26|HEL-176	75	78	1.00529	0.00760652	0.97598	0.010559
MDH2	4191	malate dehydrogenase 2, NAD (mitochondrial)	M-MDH|MDH|MGC:3559|MOR1	44	48	1.12117	0.165002	0.978454	0.00945968
GAPDHS	26330	glyceraldehyde-3-phosphate dehydrogenase, spermatogenic	GAPD2|GAPDH-2|GAPDS|HSD-35	3	3	0.954175	-0.0676738	0.980023	0.00876382
GK	2710	glycerol kinase	GK1|GKD	2	2	0.976483	-0.0343325	0.982044	0.00786887
KCTD5	54442	potassium channel tetramerization domain containing 5	-	2	2	0.976483	-0.0343325	0.982044	0.00786887
MRPS17	51373	mitochondrial ribosomal protein S17	HSPC011|MRP-S17|RPMS17|S17mt	2	2	0.976483	-0.0343325	0.982044	0.00786887
POLDIP2	26073	polymerase (DNA-directed), delta interacting protein 2	PDIP38|POLD4|p38	2	2	0.976483	-0.0343325	0.982044	0.00786887
PTRH2	51651	peptidyl-tRNA hydrolase 2	BIT1|CFAP37|CGI-147|PTH2	2	2	0.976483	-0.0343325	0.982044	0.00786887
SDHB	6390	succinate dehydrogenase complex, subunit B, iron sulfur (Ip)	CWS2|IP|PGL4|SDH|SDH1|SDH2|SDHIP	2	2	0.976483	-0.0343325	0.982044	0.00786887
SUPV3L1	6832	suppressor of var1, 3-like 1 (S. cerevisiae)	SUV3	2	2	0.976483	-0.0343325	0.982044	0.00786887
SEC61B	10952	Sec61 beta subunit	-	4	5	1.20897	0.273781	0.98586	0.00618477
TUBA3C	7278	tubulin, alpha 3c	TUBA2|bA408E5.3	19	20	1.02618	0.037286	0.986663	0.00583128
TUBA3D	113457	tubulin, alpha 3d	H2-ALPHA	19	20	1.02618	0.037286	0.986663	0.00583128
TUBA3E	112714	tubulin, alpha 3e	-	19	20	1.02618	0.037286	0.986663	0.00583128
MRPL46	26589	mitochondrial ribosomal protein L46	C15orf4|LIECG2|P2ECSL	4	4	0.976185	-0.0347741	0.987682	0.00538277
SARS2	54938	seryl-tRNA synthetase 2, mitochondrial	SARS|SARSM|SERS|SYS|SerRS|SerRSmt|mtSerRS	15	16	0.92515	-0.112241	0.990089	0.00432591
MRPL39	54148	mitochondrial ribosomal protein L39	C21orf92|L39mt|MRP-L5|MRPL5|MSTP003|PRED22|PRED66|RPML5	3	3	0.976053	-0.0349681	0.991028	0.00391392
YBX1	4904	Y box binding protein 1	BP-8|CSDA2|CSDB|DBPB|MDR-NF1|NSEP-1|NSEP1|YB-1|YB1	3	3	0.976053	-0.0349681	0.991028	0.00391392
HSD17B4	3295	hydroxysteroid (17-beta) dehydrogenase 4	DBP|MFE-2|MPF-2|PRLTS1|SDR8C1	3	3	0.910729	-0.134906	0.995536	0.00194317
KRT23	25984	keratin 23, type I	CK23|HAIK1|K23	3	2	1.19466	0.256597	0.996827	0.00138032
